# Supplementary material for: High-throughput identification of G protein-coupled receptor modulators through affinity mass spectrometry screening
Source: Chem Sci. 2018 Feb 20;9(12):3192–9. doi: 10.1039/c7sc04698g (PMC5916221; doi:10.1039/c7sc04698g)
Supplement: Supplementary file 2 [file SC-009-C7SC04698G-s002.xlsx]

## Sheet: mix-1
Supplementary Table 1. BI measurement of compounds in mix-1 from four individual MS affinity assays
Hits are in bold red with mean BI >2.0 and p <0.05
Cpd ID	BI-1	BI-2	BI-3	BI-4	Mean	s.d.	p-value
1	0.90886	0.981649	0.737989	1.05766	0.92154	0.136619	0.334001
3	0.50301	0.700277	0.814576	0.80883	0.706673	0.1456	0.0274798
19	1.08989	0.783226	1.27559	1.22521	1.09348	0.221198	0.460076
22	1.08077	1.3459	1.02245	1.25185	1.17524	0.149736	0.101159
23	0.669188	0.708244	0.321224	0.886209	0.646216	0.236355	0.0579611
25	0.724673	0.858777	1.03657	1.22751	0.961882	0.218352	0.750052
31	1.4022	1.28373	1.60201	1.47246	1.4401	0.133107	0.00704162
37	1.3288	0.887251	0.993246	0.715656	0.981239	0.2584	0.893751
39	1.01191	0.970549	0.679635	0.682967	0.836265	0.179737	0.165998
40	1.38683	1.26606	1.63294	1.48138	1.4418	0.154931	0.0106909
42	0.659716	0.824881	0.896795	0.893408	0.8187	0.111047	0.0469435
44	0.654266	0.734776	0.344266	0.576105	0.577353	0.168354	0.0152171
50	0.783433	1.27074	0.863305	0.869665	0.946786	0.219506	0.66098
55	0.575845	0.729801	0.466094	0.448276	0.555004	0.129465	0.00630436
61	0.631354	0.631026	0.588686	0.889789	0.685214	0.137847	0.0196892
64	1.15496	0.882281	1.50583	1.38519	1.23206	0.274886	0.18991
65	0.616533	0.648721	0.298735	0.745418	0.577352	0.193651	0.0222322
68	0.539414	0.706906	0.431071	0.658361	0.583938	0.123842	0.00672853
70	0.87506	1.27298	0.875046	0.755956	0.944761	0.225901	0.658324
72	1.0164	1.13583	0.716947	0.940649	0.952458	0.176371	0.627247
73	0.614654	0.856011	1.31648	0.932412	0.929889	0.291141	0.66302
75	0.469874	0.56951	0.940316	1.11544	0.773785	0.304714	0.234272
80	0.614654	0.856011	1.31648	0.932412	0.929889	0.291141	0.66302
81	0.677084	1.15666	1.30053	0.964583	1.02471	0.269534	0.866189
87	0.871387	1.25944	0.797236	0.74386	0.917982	0.233571	0.533079
90	2.05191	2.0469	0.853292	0.675249	1.40684	0.745529	0.354904
93	0.991471	0.930471	1.48323	1.07222	1.11935	0.249441	0.409198
96	0.742044	0.925381	1.2883	0.984811	0.985134	0.22699	0.904081
99	0.895338	1.17554	1.5278	1.53967	1.28459	0.309637	0.16333
107	0.479524	0.613521	0.700166	0.298171	0.522845	0.175138	0.0121407
108	0.653653	0.728763	0.699204	0.974891	0.764128	0.143865	0.0464583
112	0.597131	0.986434	0.900527	0.907498	0.847898	0.171657	0.174485
114	0.986034	0.946571	0.924208	0.838273	0.923772	0.0624679	0.0924538
116	0.747278	1.06734	1.72721	1.16585	1.17692	0.40806	0.449665
119	0.700092	0.699845	0.581808	0.440502	0.605562	0.123335	0.00774005
120	0.994245	1.3465	1.17393	1.06027	1.14373	0.154206	0.159167
124	0.68165	1.25855	1.02296	1.14235	1.02638	0.249132	0.845867
130	0.654282	0.885539	0.403148	0.525602	0.617143	0.206228	0.033972
133	1.16491	1.28372	1.5923	1.04734	1.27207	0.234285	0.102844
134	0.654655	0.808687	0.447781	0.634418	0.636385	0.14787	0.016105
137	0.465711	0.754652	0.686763	0.72674	0.658466	0.131489	0.0138564
147	1.25219	1.8861	1.4049	1.10603	1.41231	0.338612	0.0928915
152	1.07051	1.20486	1.04582	1.40168	1.18072	0.163042	0.113378
155	1.01481	0.887326	1.42166	1.23779	1.1404	0.236934	0.321299
157	0.859981	1.34615	2.06678	1.17967	1.36315	0.510632	0.250075
158	0.545541	0.626324	0.134754	0.267237	0.393464	0.231096	0.0134638
159	0.545296	0.484497	0.315145	0.322787	0.416931	0.115854	0.00208799
160	0.584054	0.663928	0.592381	0.660643	0.625252	0.0429191	0.00040927
161	0.833439	0.889808	0.947131	0.829074	0.874863	0.0555535	0.0204282
165	0.878607	1.1564	1.13169	1.14983	1.07913	0.134092	0.322953
167	0.686073	0.944221	1.08025	0.884981	0.89888	0.163737	0.304689
168	0.884168	0.934182	0.659652	0.90955	0.846888	0.126483	0.0940785
169	0.617332	0.634885	0.5062	0.579112	0.584382	0.0570858	0.000702356
170	1.5065	1.77486	1.37869	1.02917	1.4223	0.309756	0.0721414
174	0.368536	0.5928	0.354957	0.610214	0.481627	0.138719	0.00496083
192	1.02636	1.07989	1.02433	0.951177	1.02044	0.052859	0.49562
196	0.502717	0.840805	0.483603	0.510532	0.584414	0.171301	0.0167094
202	0.282021	0.436851	0.527317	0.768984	0.503793	0.203751	0.0165357
203	0.79032	1.27008	1.12921	0.854704	1.01108	0.226735	0.928307
207	1.24622	1.22095	1.23724	1.19721	1.2254	0.0215095	0.000237598
210	1.33049	0.811684	1.15002	1.37293	1.16628	0.255391	0.283813
211	0.520912	0.643897	0.921254	1.00045	0.771629	0.226512	0.137131
213	1.79652	1.84341	2.05891	1.68744	1.84657	0.155913	0.00167084
217	1.14709	1.22865	0.95493	1.10146	1.10803	0.114828	0.156447
223	0.785859	0.984871	0.782028	0.837347	0.847526	0.0949738	0.048924
226	0.745691	1.13573	1.1073	1.31742	1.07653	0.239396	0.568051
227	0.585694	0.761076	0.698192	0.897007	0.735492	0.129836	0.0266853
228	0.839548	1.74721	0.99037	0.755749	1.08322	0.45318	0.737798
229	0.981543	1.10415	0.891505	0.852918	0.957529	0.111621	0.502018
230	0.727219	0.742525	0.894944	1.02565	0.847585	0.140802	0.119019
231	0.727618	0.876867	1.33407	0.887871	0.956605	0.262039	0.762275
232	0.726956	0.978996	1.2888	0.808198	0.950739	0.248652	0.718437
236	1.2616	1.19237	1.49403	1.21553	1.29088	0.138456	0.0246034
244	0.829246	1.22535	1.24352	0.87068	1.0422	0.222742	0.729988
250	1.66254	1.54684	1.38763	1.57826	1.54382	0.115017	0.00250666
252	0.723483	0.879205	0.628375	0.828705	0.764942	0.11179	0.0245495
255	1.16573	1.26775	0.712246	0.824976	0.992677	0.26607	0.95956
256	0.821063	1.21451	1.07965	0.926431	1.01041	0.172582	0.911595
265	3.11434	5.16573	4.89521	3.73047	4.22644	0.968207	0.00688641
268	0.85935	1.04975	0.606879	0.580735	0.774178	0.222562	0.135436
274	1.06138	1.14916	0.761489	0.934474	0.976625	0.168336	0.799272
278	0.395033	0.576034	0.286223	0.37443	0.40793	0.1216	0.00230049
283	0.749214	0.545395	0.690834	1.11463	0.775019	0.242086	0.160038
291	1.2853	0.63015	0.754039	1.04809	0.929395	0.294989	0.664879
294	0.650596	1.43476	0.691495	0.890539	0.916847	0.360831	0.676232
295	1.12636	0.957975	0.77802	0.697877	0.890057	0.191429	0.333978
299	1.29105	1.16328	0.834665	0.721064	1.00252	0.26863	0.986234
304	0.283197	0.609972	0.178713	0.301695	0.343394	0.185783	0.00582166
306	0.831328	0.910732	0.80688	0.950464	0.874851	0.0671294	0.0336074
307	0.827085	1.53624	1.27869	0.928858	1.14272	0.325937	0.445639
311	0.8141	1.10465	1.45536	1.1842	1.13958	0.263858	0.367724
314	0.815727	1.3209	0.771911	0.593626	0.875542	0.312058	0.48337
316	0.471945	0.787843	0.730819	1.04745	0.759515	0.236101	0.134418
318	0.825309	1.30507	0.858273	0.704504	0.923288	0.262963	0.600563
320	0.735206	1.15723	1.88564	1.21616	1.24856	0.475672	0.372778
322	1.03104	1.35377	1.12755	1.21507	1.18186	0.137055	0.0767464
323	0.892209	0.873004	1.0306	1.34875	1.03614	0.219911	0.764008
324	1.28064	0.719644	1.32824	0.937871	1.0666	0.289378	0.676622
327	0.837699	0.970956	0.914323	0.947275	0.917563	0.0580873	0.0657342
333	1.19299	1.47901	1.1673	1.16135	1.25016	0.15318	0.0469094
337	0.619163	0.848724	0.602348	0.803309	0.718386	0.125844	0.0207917
346	1.14809	1.38469	0.918382	1.27981	1.18274	0.201074	0.166706
352	1.10887	0.619296	0.955667	0.743993	0.856956	0.217904	0.280613
361	0.756297	0.970016	0.52619	0.544232	0.699184	0.208606	0.0633186
363	0.756297	0.970016	0.52619	0.644232	0.724184	0.188908	0.0614905
364	0.854366	1.12014	1.07238	1.19339	1.06007	0.145888	0.470576
374	0.736185	1.07695	0.806242	0.977075	0.899113	0.155857	0.286092
383	0.474351	0.586955	0.746474	1.03194	0.709931	0.24197	0.096085
394	0.600516	1.25781	1.50372	1.27603	1.15952	0.389098	0.472331
402	1.02758	0.993859	0.955211	1.28893	1.0664	0.151273	0.444664
404	0.397094	0.209362	0.387584	0.212006	0.301511	0.104956	0.000916577
407	1.3906	1.40921	1.79081	1.7801	1.59268	0.222769	0.012967
408	0.54406	0.587485	0.941343	0.962641	0.758882	0.223857	0.120229
409	1.2282	1.22671	1.06714	1.15519	1.16931	0.076161	0.0211637
416	0.822977	0.964199	0.890019	0.958572	0.908942	0.0664944	0.0714088
418	7.66769	15.0817	7.51129	8.56778	9.70711	3.61316	0.0170176
431	1.8414	3.37766	2.16408	3.03413	2.60432	0.720798	0.0210952
437	1.50291	0.911152	0.320902	0.472672	0.801909	0.530127	0.509107
439	0.953455	1.46701	1.21556	0.88556	1.1304	0.265718	0.398733
446	7.93513	7.99883	10.8656	8.53495	8.83363	1.3811	0.00146943
459	3.0924	1.47991	3.94656	1.91025	2.60728	1.12336	0.0644951
462	1.9324	2.80654	1.86457	2.91592	2.37986	0.558321	0.0158844
464	0.814438	1.4624	0.887065	0.652643	0.954136	0.352724	0.811647
465	1.11202	1.60318	1.50673	1.3463	1.39206	0.214662	0.0354229
476	1.03605	1.18193	1.28237	0.964101	1.11611	0.143166	0.203248
477	1.0386	0.766511	1.81615	2.00875	1.4075	0.598736	0.266671
478	1.14249	0.624667	0.824772	0.772371	0.841074	0.218073	0.241024

## Sheet: mix-2
Supplementary Table 1. BI measurement of compounds in mix-2 from four individual MS affinity assays
Hits are in bold red with mean BI >2.0 and p <0.05
Cpd ID	BI-1	BI-2	BI-3	BI-4	Mean	s.d.	p-value	BI-1	BI-2	BI-3	BI-4	Mean	s.d.	p-value
481	0.000228667	0.000216342	0.000162164	0.000172882	0.000257224	0.000227942	0.000185111	0.88898	0.949111	0.876041	0.642144	0.839069	0.135089	0.0973893
488	0.00270319	0.00203142	0.00450817	0.00380253	0.0020212	0.00281363	0.00349186	1.33742	0.721994	1.29105	0.868428	1.05472	0.306151	0.74439
489	0.00022201	0.000253026	0.000164708	0.000185797	0.000251996	0.000228581	0.000187833	0.881005	1.10694	0.876887	0.867408	0.933061	0.116061	0.332258
491	0.00443383	0.00487021	0.00369142	0.00511015	0.00761495	0.00726633	0.00489405	0.582253	0.670243	0.754266	1.00515	0.752979	0.182196	0.0730664
492	0.00883842	0.00789367	0.00611562	0.00547	0.00907429	0.00826857	0.00620987	0.974006	0.95466	0.984822	0.809496	0.930746	0.0817904	0.188944
500	0.00286413	0.00358752	0.00224911	0.00371359	0.00273292	0.0019853	0.0024448	1.04801	1.80704	0.919955	1.82949	1.40112	0.484588	0.196394
502	0.0154619	0.0140908	0.0123983	0.00949179	0.0105852	0.00851729	0.00878113	1.46071	1.65437	1.41192	0.914246	1.36031	0.315272	0.106373
507	0.000670371	0.000750927	0.00052677	0.000756396	0.00086543	0.000682227	0.000661251	0.77461	1.1007	0.796626	1.06483	0.934191	0.172416	0.500785
510	0.0395247	0.0312301	0.0378738	0.0313416	0.0274508	0.0223421	0.024987	1.43984	1.39781	1.51574	0.988533	1.33548	0.236391	0.0657356
511	0.00154481	0.00345552	0.00294673	0.00237691	0.00230839	0.00316369	0.00312931	0.669212	1.09224	0.941655	0.469061	0.793042	0.278031	0.233305
517	0.000353131	0.000374052	0.000305039	0.000251839	0.000306717	0.000296356	0.0001715	1.15133	1.26217	1.77866	0.712921	1.22627	0.438012	0.377516
519	0.000711763	0.000252399	0.000189722	0.000232173	0.000510266	0.00023018	0.000207383	1.39489	1.09653	0.914836	0.892783	1.07476	0.232125	0.565352
524	0.026704	0.0391263	0.0612704	0.0641763	0.0277415	0.0471824	0.049698	0.9626	0.829256	1.23285	1.37392	1.09966	0.248237	0.480738
528	0.0012597	0.00126011	0.00109212	0.000970371	0.00139382	0.000908251	0.00111858	0.903772	1.38741	0.976342	0.870463	1.0345	0.239392	0.791959
532	0.000272374	0.000288143	0.000243565	0.00025448	0.000217142	0.000214195	0.000206641	1.25436	1.34524	1.17869	1.19632	1.24365	0.0750435	0.00741521
533	0.000164409	0.000171506	0.000114469	0.000118581	0.000147782	0.000161126	0.000127449	1.11251	1.06442	0.898154	0.76345	0.959634	0.159812	0.648218
539	0.00311537	0.0029087	0.0038769	0.00335227	0.00264753	0.00368575	0.00340599	1.17671	0.789175	1.13826	0.71479	0.954734	0.2366	0.727487
548	0.0933286	0.0599431	0.0743937	0.0712612	0.129423	0.0687083	0.0684041	0.721112	0.872428	1.08756	1.1316	0.953175	0.191719	0.658694
558	0.00197406	0.00223961	0.00318542	0.00262581	0.00151511	0.00288492	0.00258561	1.30292	0.776317	1.23198	0.759554	1.01769	0.289924	0.910583
559	0.00403033	0.00242617	0.00416434	0.00272532	0.0022345	0.00209879	0.00272667	1.80368	1.15598	1.52726	0.6463	1.28331	0.500764	0.340118
566	0.00207537	0.0015586	0.00224338	0.00193663	0.00177443	0.00162245	0.00198177	1.1696	0.96065	1.13201	0.867699	1.03249	0.142618	0.679627
567	0.00225888	0.00249734	0.00305039	0.00316735	0.00215399	0.00342968	0.00293405	1.0487	0.728156	1.03965	0.804888	0.905348	0.163376	0.330434
569	0.016161	0.0105374	0.0139404	0.0120583	0.0139351	0.00904318	0.0119127	1.15973	1.16523	1.17022	1.02703	1.13055	0.0691486	0.0325308
570	0.00029061	0.000300998	0.000228938	0.000244207	0.0003346	0.000326088	0.000270242	0.868528	0.923057	0.84716	0.664599	0.825836	0.112141	0.0530397
580	0.00146607	0.00126262	0.00113494	0.00085854	0.00121153	0.00106298	0.000985937	1.2101	1.18781	1.15113	0.545267	1.02358	0.319798	0.892132
581	0.00116012	0.00124695	0.000962812	0.000714717	0.00120909	0.00117583	0.00097975	0.9595	1.06048	0.982711	0.531525	0.883553	0.238626	0.401055
586	0.000577746	0.000761901	0.000655441	0.000653371	0.000761564	0.000673276	0.000632544	0.758631	1.13163	1.0362	0.807765	0.933557	0.179064	0.511838
587	0.00145652	0.00141093	0.00120807	0.00122603	0.00124987	0.00112085	0.00118738	1.16534	1.2588	1.01743	0.986673	1.10706	0.127736	0.192279
593	0.00351945	0.00277608	0.00356232	0.00334963	0.00288941	0.00194885	0.00272024	1.21805	1.42447	1.30956	1.01424	1.24158	0.173501	0.0687185
595	0.00061248	0.000597606	0.000445581	0.000439984	0.000711374	0.000650577	0.000526873	0.860982	0.918578	0.84571	0.613012	0.809571	0.134743	0.0663779
597	0.00444019	0.00482631	0.00626443	0.00614333	0.00438466	0.00682707	0.00597056	1.01267	0.706938	1.04922	0.692067	0.865222	0.192034	0.255018
599	0.0113005	0.00961845	0.00994524	0.00793262	0.0105702	0.00850354	0.00861136	1.06909	1.13111	1.1549	0.694143	1.01231	0.215173	0.916136
602	0.00647794	0.00463568	0.00580125	0.00321461	0.00477119	0.00324553	0.00382645	1.35772	1.42833	1.51609	0.597698	1.22496	0.423162	0.365675
613	0.000633321	0.00060858	0.000487977	0.000447615	0.000588688	0.000464196	0.000449661	1.07582	1.31104	1.08521	0.876064	1.08703	0.17778	0.399725
614	0.00286094	0.00208786	0.00211365	0.00145027	0.00225263	0.00180947	0.00180136	1.27005	1.15385	1.17336	0.551344	1.03715	0.327832	0.835264
615	0.0133151	0.0112504	0.0128848	0.0105341	0.0123771	0.0138153	0.0121987	1.07579	0.814348	1.05624	0.617276	0.890911	0.217753	0.390198
616	0.000189302	0.000195021	0.00014669	0.000186678	0.000139068	0.000132034	0.000108641	1.36121	1.47706	1.35022	1.12675	1.32881	0.146418	0.020596
620	0.00894262	0.00710574	0.0075539	0.00609256	0.00795234	0.00658825	0.00650263	1.12453	1.07855	1.16167	0.667655	1.0081	0.229495	0.948171
622	0.00315676	0.00364458	0.00516764	0.00378374	0.00356907	0.00440922	0.00426893	0.884478	0.826582	1.21052	0.634513	0.889024	0.239484	0.422395
623	0.0133359	0.0107136	0.0114179	0.00996142	0.0104695	0.00798276	0.00830301	1.27379	1.3421	1.37515	1.07172	1.26569	0.136028	0.0297942
626	0.000412469	0.000510756	0.000682575	0.000543008	0.000449619	0.000452687	0.000395216	0.917374	1.12828	1.72709	0.642196	1.10373	0.460769	0.683067
641	0.00130803	0.000958803	0.000795984	0.00128913	0.00173504	0.00115601	0.000894867	0.753891	0.829405	0.8895	1.10508	0.894469	0.150971	0.256539
647	0.00100816	0.000311031	0.000948821	0.000193722	0.000567775	0.000224745	0.000243267	1.77564	1.38393	1.90033	1.37849	1.6096	0.268594	0.0200183
649	0.00991113	0.00477301	0.0101161	0.00756924	0.0100607	0.00567713	0.00828643	0.985136	0.840744	1.2208	0.904587	0.987818	0.16618	0.892733
650	0.0124702	0.0108908	0.00913739	0.00716184	0.0107769	0.00749842	0.0079073	1.15712	1.45241	1.15556	0.621675	1.09669	0.346071	0.615298
653	0.000664871	0.000520475	0.000686178	0.000590852	0.000612388	0.000507994	0.00064962	1.0857	1.02457	1.05628	0.804637	0.992797	0.127899	0.91743
660	0.0429987	0.0312147	0.0348115	0.0244236	0.0297177	0.0215368	0.0283026	1.4469	1.44937	1.22997	0.885792	1.25301	0.265537	0.15278
664	0.00122033	0.00110366	0.00108746	0.00107398	0.000969993	0.0009399	0.000925306	1.25808	1.17423	1.17524	1.05465	1.16555	0.0837244	0.0288554
665	0.00541767	0.00406974	0.0048785	0.00364608	0.00421004	0.00297955	0.00359308	1.28685	1.36589	1.35775	0.858453	1.21724	0.241808	0.170232
666	0.0280858	0.0161407	0.0258914	0.0185398	0.017937	0.0126014	0.0172574	1.5658	1.28087	1.50031	0.916952	1.31598	0.2926	0.119595
668	0.0332916	0.0306463	0.0259493	0.0232507	0.0280416	0.0239483	0.0243539	1.18722	1.27969	1.06551	0.807703	1.08503	0.204634	0.466911
672	0.0138949	0.0077764	0.0128879	0.00919915	0.00565091	0.00419023	0.0063148	2.45887	1.85584	2.04091	1.10634	1.86549	0.565472	0.0549446
674	0.00722935	0.0058218	0.00695506	0.00576117	0.00570668	0.00495973	0.00549888	1.26682	1.17381	1.26481	0.93661	1.16052	0.155445	0.130839
677	0.000334028	0.000382205	0.000301011	0.00104346	0.000397338	0.000317456	0.000266777	0.840664	1.20396	1.12832	2.69232	1.46632	0.832185	0.344038
679	0.000379761	0.000237976	0.000107262	0.000192254	0.000303232	0.000175512	0.000112353	1.25238	1.3559	0.954683	1.28172	1.21117	0.176453	0.0964379
680	0.000313477	0.000295981	0.000211132	0.000240098	0.000371546	0.000260231	0.000273459	0.843709	1.13738	0.772078	0.696603	0.862442	0.192881	0.249027
681	0.0107615	0.00679283	0.0100495	0.00865908	0.0105023	0.00712502	0.0090234	1.02469	0.953377	1.11372	0.902892	0.998669	0.0915388	0.978619
682	0.0199673	0.0173061	0.0158849	0.012928	0.0156534	0.0119332	0.012882	1.27559	1.45025	1.23311	0.904875	1.21595	0.22768	0.154086
683	0.000652135	0.000320751	0.000419508	0.000304085	0.000881463	0.000263108	0.000326913	0.739833	1.21908	1.28324	0.578078	0.955058	0.349212	0.813523
685	0.00224499	0.00196526	0.0019057	0.00166865	0.00222684	0.0016963	0.00191669	1.00815	1.15856	0.994266	0.566505	0.931872	0.254685	0.629763
689	0.0106773	0.00849472	0.00858009	0.00787832	0.00573143	0.00634369	0.00511851	1.86294	1.33908	1.67629	1.55046	1.60719	0.220063	0.0117204
690	0.00857849	0.01339	0.0120572	0.0108188	0.00801821	0.0116426	0.00923871	1.06988	1.15009	1.30507	0.687667	1.05318	0.262501	0.71253
693	0.00830033	0.0138218	0.0215454	0.0223538	0.00990382	0.017508	0.018988	0.838093	0.789452	1.13469	1.39393	1.03904	0.281527	0.799519
707	0.0246208	0.0207061	0.0258143	0.0136956	0.0186456	0.014548	0.0159878	1.32046	1.4233	1.61462	0.866934	1.30633	0.317276	0.149022
715	0.000451835	0.000281872	0.000344679	0.00025947	0.000318219	0.000210678	0.00021555	1.41989	1.33793	1.59907	0.884095	1.31024	0.304308	0.134174
717	0.0123825	0.0116856	0.00964826	0.00850322	0.0106727	0.00826217	0.00854133	1.1602	1.41435	1.1296	0.993581	1.17443	0.175576	0.141098
722	0.00333449	0.005486	0.00638907	0.00395633	0.00409293	0.00308185	0.00293876	0.814694	1.7801	2.17407	0.540919	1.32745	0.775287	0.460312
726	0.00242995	0.00224149	0.00207253	0.00206343	0.00198774	0.00172091	0.00198722	1.22247	1.3025	1.04293	1.03957	1.15187	0.13185	0.104636
730	0.00271188	0.00288958	0.00525773	0.00465696	0.00186365	0.00209464	0.00259922	1.45514	1.37951	2.02281	1.64963	1.62677	0.287497	0.0222981
735	0.000355158	0.000298176	0.000219823	0.000202821	0.000261058	0.000244566	0.000209363	1.36045	1.2192	1.04996	0.899666	1.13232	0.200421	0.27839
736	0.00290262	0.00260865	0.00217788	0.00222252	0.00244189	0.00199585	0.00220623	1.18868	1.30704	0.987149	1.05169	1.13364	0.142911	0.158216
740	0.0186728	0.0132125	0.0163203	0.0137962	0.016448	0.01029	0.0109903	1.13526	1.28402	1.48497	1.31911	1.30584	0.14357	0.023715
742	0.00204469	0.00205306	0.00180225	0.00158558	0.00160051	0.00124872	0.00166723	1.27753	1.64412	1.08098	0.949399	1.23801	0.302458	0.213592
743	0.00303375	0.00293755	0.00275913	0.00261202	0.00231083	0.00230467	0.00238813	1.31284	1.27461	1.15535	1.14928	1.22302	0.0831559	0.0126824
744	0.00275037	0.00318681	0.00240321	0.00184388	0.00368758	0.00312885	0.00233418	0.745849	1.01853	1.02958	1.18916	0.995779	0.183959	0.966284
751	0.00119602	0.00112247	0.00100288	0.000987101	0.00112579	0.000890348	0.000991877	1.06238	1.26071	1.01109	0.987409	1.0804	0.124215	0.286133
752	0.00169329	0.0017414	0.00115847	0.00104786	0.00181904	0.00168127	0.00129676	0.930872	1.03576	0.893353	0.562283	0.855568	0.204601	0.252844
753	0.000766469	0.000725844	0.000534189	0.000651317	0.000892616	0.000749043	0.000594433	0.858677	0.969028	0.898653	0.965987	0.923086	0.0538413	0.064733
766	0.000368762	0.000308523	0.000288504	0.000294986	0.000409537	0.000343671	0.000318499	0.900436	0.897727	0.905824	0.771127	0.868779	0.0651881	0.0275383
767	0.000845779	0.000952219	0.000587608	0.000854138	0.000884251	0.00114355	0.000824832	0.956491	0.83269	0.712397	0.949993	0.862893	0.115338	0.0978395
768	0.0107997	0.0105678	0.00917787	0.00992443	0.00153986	0.00142807	0.0015529	7.01346	7.40007	5.91015	5.75388	6.51939	0.811767	0.000860221
769	0.000228088	0.000229824	0.000250348	0.000158206	0.000152313	0.000156011	0.000158631	1.4975	1.47313	1.57818	0.564077	1.27822	0.478208	0.32872
770	0.000356026	0.000441777	0.000442614	0.000444386	0.00042313	0.00070013	0.000485049	0.84141	0.630993	0.912512	0.601782	0.746675	0.15368	0.045844
771	0.00380687	0.0178081	0.0022419	0.00544153	0.00703741	0.00910137	0.00306076	0.540948	1.95664	0.732464	1.46848	1.17463	0.657	0.631847
772	0.00582725	0.0042331	0.00538429	0.00523783	0.0222328	0.00525897	0.00790408	0.262101	0.804929	0.681203	0.706893	0.613782	0.240438	0.0488585
778	0.0129478	0.110199	0.0850469	0.140161	0.0525849	0.197752	0.202002	0.546226	0.55726	0.421021	0.819866	0.586093	0.16765	0.0159296
779	0.00116186	0.00102182	0.000951577	0.00087439	0.000988465	0.000841435	0.000930008	1.17542	1.21438	1.02319	0.6085	1.00537	0.277144	0.971503
780	0.000299293	0.000320124	0.000214523	0.000346351	0.000536406	0.00034431	0.000306868	0.55796	0.929753	0.699074	1.33335	0.880036	0.338846	0.529954
784	0.0356492	0.0402578	0.0292218	0.0439203	0.0514915	0.0482287	0.0409812	0.692332	0.834727	0.713054	1.04695	0.821767	0.162736	0.116205
786	0.000335185	0.000399136	0.000286173	0.000300269	0.000360044	0.000299234	0.000254156	0.930957	1.33386	1.12597	1.00587	1.09917	0.175877	0.341504
787	0.000241114	0.000311031	0.000211556	0.000221313	0.000225507	0.000170397	0.000239308	1.06921	1.82533	0.884033	1.0014	1.19499	0.427131	0.428544
788	0.000318108	0.000312599	0.000259039	0.000254774	0.00032519	0.000226024	0.000212333	0.978222	1.38304	1.21997	0.976359	1.1394	0.198671	0.255125
789	0.0146104	0.0140883	0.0095711	0.00762002	0.0131059	0.0106327	0.00942778	1.1148	1.32499	1.0152	0.627233	1.02056	0.292287	0.897054
790	0.00188549	0.00185396	0.00168842	0.0016211	0.00167544	0.00122059	0.00143832	1.12537	1.5189	1.17388	1.03113	1.21232	0.212808	0.139947
792	0.000215352	0.000233587	0.000208376	0.000223954	0.000174968	8.50386e-05	0.000191545	1.23081	2.74683	1.08787	1.42557	1.62277	0.762049	0.200674
796	0.000547643	0.000323259	0.00035125	0.000117407	0.000408143	0.000615731	0.000699857	1.34179	0.525001	0.501889	0.811005	0.794922	0.390748	0.37097
797	0.0187527	0.0214307	0.0211123	0.0150067	0.0223304	0.0208626	0.0180926	0.839785	1.02723	1.1669	0.757303	0.947806	0.184637	0.611348
798	0.00528539	0.00533644	0.00577687	0.00578465	0.00550383	0.00594311	0.0049725	0.960312	0.89792	1.16176	0.80949	0.957372	0.149653	0.608753
799	0.00251476	0.00236409	0.00204158	0.00134519	0.00201004	0.00250384	0.00231042	1.2511	0.944183	0.883639	0.368911	0.861958	0.365949	0.505407
800	0.0126279	0.0111388	0.0117013	0.00952584	0.0117825	0.00891435	0.00975345	1.07176	1.24954	1.19971	0.761088	1.07052	0.219458	0.56617
802	0.00583767	0.00282311	0.00129901	0.00196305	0.00485171	0.00196484	0.00131706	1.20322	1.43681	0.986298	1.30281	1.23229	0.189877	0.0919501
806	0.00147534	0.001283	0.00118073	0.000550933	0.000571609	0.000784529	0.000661746	2.58102	1.63538	1.78426	1.09476	1.77386	0.614269	0.0862071
812	0.0108828	0.0106751	0.0096773	0.0100245	0.00883136	0.00703455	0.00772788	1.23229	1.51752	1.25226	1.42962	1.35792	0.138516	0.0140561
813	0.000741576	0.000456827	0.000621737	0.000480196	0.000632952	0.000300512	0.000485544	1.17161	1.52016	1.28049	1.03053	1.2507	0.206741	0.0937269
814	0.00505962	0.00634322	0.00376158	0.0031427	0.00450491	0.00541146	0.0037235	1.12314	1.17218	1.01023	1.08548	1.09776	0.0683014	0.0644459
817	0.000284242	0.000272152	0.000190782	0.000194015	0.000630861	0.000602943	0.000426398	0.450562	0.451373	0.447426	0.456673	0.451509	0.00384055	9.46311e-08
820	0.00148836	0.00145639	0.00118136	0.000985634	0.00148897	0.00149265	0.00123193	0.999591	0.975707	0.958956	0.566003	0.875064	0.206714	0.31333
821	0.0119104	0.0104484	0.00980385	0.00935853	0.0108658	0.0104757	0.0095134	1.09613	0.997389	1.03053	0.708657	0.958178	0.171333	0.658866
822	0.0106816	0.00752338	0.0111228	0.00941371	0.00873934	0.00540315	0.00768878	1.22225	1.39241	1.44663	1.02595	1.27181	0.189743	0.0643125
826	0.000833043	0.00094344	0.000628308	0.000664818	0.000849397	0.00067871	0.000668428	0.980746	1.39005	0.939979	0.711565	1.00558	0.28236	0.970933
831	0.00196798	0.00145106	0.00188386	0.00188938	0.0017096	0.000834721	0.00157814	1.15114	1.73838	1.19372	1.12532	1.30214	0.29219	0.130479
833	0.0033203	0.002471	0.00341457	0.0203848	0.00398872	0.00321037	0.00360075	0.832424	0.769695	0.948294	1.55368	1.02602	0.359468	0.894054
835	0.00236338	0.00268327	0.00254291	0.0023455	0.0215354	0.0199412	0.017417	0.109744	0.134559	0.146002	0.12294	0.128311	0.0155518	1.565e-06
836	0.000369051	0.000332038	0.000242081	0.000308194	0.000445785	0.000401855	0.000329388	0.827868	0.826263	0.734941	0.526649	0.72893	0.141676	0.0314322
838	0.0156	0.0134493	0.0128362	0.0143894	0.0114702	0.0101541	0.00868907	1.36005	1.32451	1.47728	1.5221	1.42099	0.0938306	0.00292097
841	0.00917129	0.0079755	0.00834882	0.00863061	0.00791191	0.00568927	0.00727055	1.15918	1.40185	1.14831	1.01658	1.18148	0.160573	0.108886
844	0.000258481	0.000177463	0.000260735	0.000172589	0.000210519	0.000224106	0.000158136	1.22782	0.791874	1.6488	0.914355	1.14571	0.382348	0.501385
845	0.0428609	0.0428671	0.0326027	0.0351467	0.0416999	0.0435417	0.0365982	1.02784	0.984507	0.890827	1.14627	1.01236	0.106013	0.830623
846	0.00813534	0.00966015	0.00837935	0.00488121	0.0106556	0.00993865	0.00735642	0.763478	0.971978	1.13905	0.456738	0.832812	0.294046	0.33808
856	0.000186986	0.000208817	0.000140967	0.000205756	0.000160329	0.000137788	0.000144772	1.16626	1.5155	0.973711	1.21161	1.21677	0.224271	0.148711
858	0.000885144	0.00096915	0.000720943	0.000772833	0.000904118	0.000671677	0.000687731	0.979014	1.44288	1.04829	0.973618	1.11095	0.223884	0.394677
859	0.00247395	0.00246317	0.00172318	0.00204934	0.00264334	0.00206394	0.0017197	0.935916	1.19343	1.00203	0.807706	0.984769	0.160804	0.86184
860	0.00532852	0.00502165	0.00433795	0.00477759	0.00486878	0.00463716	0.00396256	1.09443	1.08291	1.09474	1.20242	1.11862	0.0561349	0.0242265
863	0.00200243	0.00198564	0.00167146	0.00187	0.00220697	0.00149489	0.00148831	0.907321	1.32829	1.12306	0.930748	1.07235	0.196097	0.51403
864	0.00258654	0.00354205	0.00157925	0.00210511	0.00357325	0.00394311	0.00222653	0.723862	0.89829	0.709289	0.931333	0.815694	0.115398	0.0495482
865	0.0026233	0.0026331	0.00224826	0.00179604	0.00294588	0.00259016	0.00224954	0.8905	1.01658	0.999429	0.547996	0.863626	0.217701	0.299024
866	0.000471228	0.000445226	0.000348283	0.000348699	0.000478548	0.000437341	0.00036354	0.984703	1.01803	0.958032	0.67158	0.908086	0.15957	0.332785
872	0.00111294	0.00170001	0.00081591	0.00116204	0.00164651	0.00184815	0.00141506	0.675939	0.919844	0.576591	1.28736	0.864935	0.316398	0.455984
882	0.000806124	0.00139117	0.0014474	0.00169008	0.000723573	0.00203038	0.00172366	1.11409	0.68518	0.839724	0.694029	0.833255	0.200182	0.194317
884	0.00282997	0.00287045	0.00287614	0.00267307	0.00137291	0.00114834	0.00123415	2.0613	2.49965	2.33046	1.74356	2.15874	0.330444	0.00595397
896	0.000497279	0.000236409	0.000158773	0.000167892	0.000419645	0.000231778	0.000159621	1.185	1.01998	0.994687	0.597352	0.949254	0.249317	0.711254
897	0.000568194	0.000549007	0.000374356	0.000415035	0.000567775	0.000507994	0.000422191	1.00074	1.08074	0.886699	0.63134	0.899879	0.195933	0.382005
901	0.00146463	0.000992039	0.00141581	0.00134285	0.0012436	0.000953008	0.00119728	1.17773	1.04096	1.18252	0.944224	1.08636	0.115269	0.230969
903	0.00055488	0.000481596	0.000369693	0.000409458	0.000585899	0.000509273	0.00040858	0.947056	0.945656	0.904823	0.690269	0.871951	0.122695	0.12811
908	0.000134885	0.000150812	9.87826e-05	0.000134725	0.00017462	0.000161445	0.000155661	0.772449	0.934139	0.634599	0.875725	0.804228	0.131368	0.0585724
909	0.00110021	0.00037562	0.00116398	0.000296747	0.000727756	0.000203006	0.000274944	1.51178	1.85029	2.23352	2.44225	2.00946	0.412524	0.0163212
914	0.00167795	0.0011927	0.00153918	0.0013402	0.00133039	0.000963877	0.00130295	1.26125	1.2374	1.18131	0.896666	1.14416	0.168363	0.185332
915	0.0119104	0.0104484	0.00980385	0.00935853	0.0108658	0.0104757	0.0095134	1.09613	0.997389	1.03053	0.708657	0.958178	0.171333	0.658866
916	0.00129443	0.00135041	0.0012015	0.00125097	0.00122408	0.000775258	0.00104607	1.05747	1.74189	1.14858	1.09571	1.26091	0.322819	0.204413
917	0.000379472	0.000388162	0.000270698	0.000271798	0.000458681	0.000404093	0.00033508	0.82731	0.960575	0.807861	0.603211	0.799739	0.147555	0.0728937
918	0.000679054	0.000664703	0.000459996	0.00047726	0.000801995	0.000620206	0.000560529	0.846706	1.07175	0.820646	0.767808	0.876727	0.134092	0.163258
922	0.00307948	0.00177244	0.00299951	0.00237427	0.00267576	0.00163523	0.00247821	1.15088	1.0839	1.21036	0.928192	1.09333	0.12161	0.222356
923	0.00195988	0.00201261	0.00143765	0.00119374	0.00245827	0.0021346	0.00181869	0.797261	0.942852	0.790486	0.469556	0.750039	0.199761	0.0875055
925	0.000558932	0.000605131	0.000437526	0.000572947	0.000472623	0.000453006	0.000605817	1.18262	1.33581	0.722209	0.582434	0.955767	0.360473	0.821967
929	0.00301291	0.00790966	0.00243946	0.00329034	0.00408038	0.00697732	0.00207804	0.738388	1.13362	1.17392	1.11204	1.03949	0.202369	0.722366
933	0.00017975	0.000324513	0.000106626	0.000191961	0.000324144	0.000202047	0.000166055	0.554536	1.60613	0.642111	1.29251	1.02382	0.508988	0.931328
934	0.00618617	0.00736661	0.00530289	0.00562527	0.00625563	0.00665475	0.00667636	0.988896	1.10697	0.794278	0.837756	0.931975	0.143412	0.412777
938	0.0167274	0.0142196	0.0133153	0.0150002	0.00813253	0.0067107	0.00643136	2.05685	2.11895	2.07037	2.3395	2.14642	0.131452	0.000410717
939	0.00171066	0.00161504	0.00129986	0.00124334	0.00161236	0.00117679	0.00124628	1.06097	1.37241	1.04299	1.14511	1.15537	0.151384	0.132424
940	0.0061688	0.00588137	0.00461671	0.00383922	0.00752154	0.0075272	0.00573744	0.820152	0.78135	0.804663	0.944794	0.83774	0.07313	0.0212731
942	0.00647562	0.00393116	0.0069434	0.00625722	0.00494581	0.00370525	0.00514177	1.30931	1.06097	1.35039	1.00809	1.18219	0.172682	0.125352
943	0.00161919	0.000570955	0.000708012	0.000741133	0.00141125	0.00210071	0.00193451	0.84735	0.371792	0.365991	0.490207	0.518835	0.226366	0.0238531
944	0.000380051	0.000361197	0.000289352	0.000283538	0.000384093	0.000345589	0.00026752	0.989474	1.04516	1.08161	0.612772	0.932255	0.216333	0.575534
950	0.000303925	0.000316048	0.000220671	0.000282951	0.000334949	0.000326088	0.000241782	0.907376	0.96921	0.912684	0.770661	0.889983	0.0843257	0.0797306
951	0.00294054	0.0025914	0.00236633	0.00262053	0.00224182	0.00191752	0.00175162	1.31168	1.35143	1.35094	1.54447	1.38963	0.104894	0.00504726
953	0.0115266	0.010998	0.00909732	0.00933446	0.00919071	0.00618704	0.00756652	1.25415	1.77759	1.20231	1.22977	1.36596	0.275239	0.0763912
957	0.00163685	0.00148053	0.00109466	0.00100471	0.00163641	0.00152238	0.00115867	1.00027	0.97251	0.944755	0.831329	0.937217	0.074141	0.188912
958	0.00086633	0.000758765	0.00068957	0.000555336	0.000710329	0.000565219	0.000604332	1.21962	1.34243	1.14105	0.804917	1.127	0.230161	0.350345
960	0.00116012	0.00124695	0.000962812	0.000714717	0.00120909	0.00117583	0.00097975	0.9595	1.06048	0.982711	0.531525	0.883553	0.238626	0.401055

## Sheet: mix-3
Supplementary Table 1. BI measurement of compounds in mix-3 from four individual MS affinity assays
Hits are in bold red with mean BI >2.0 and p <0.05
Cpd ID	BI-1	BI-2	BI-3	BI-4	Mean	s.d.	p-value	BI-1	BI-2	BI-3	BI-4	Mean	s.d.	p-value
961	0.000475365	0.00045703	0.000450452	0.000503141	0.000644856	0.000711631	0.0005209	0.737165	0.642229	0.864756	0.879247	0.780849	0.112319	0.0298751
964	0.00918474	0.0109858	0.00785978	0.00836799	0.00981172	0.00977636	0.00580825	0.936099	1.12372	1.35321	1.30225	1.17882	0.189383	0.155393
965	0.00226631	0.00126937	0.000745558	0.000879149	0.00213026	0.000663714	0.000422682	1.06386	1.91253	1.76387	1.27078	1.50276	0.401056	0.0871531
966	0.00152741	0.00172902	0.00225075	0.00195864	0.00168684	0.00180467	0.00166722	0.905483	0.958082	1.35	1.16701	1.09514	0.204021	0.419779
967	0.000106125	0.000100669	0.000130711	0.000112408	0.000117838	0.000105455	0.000111976	0.900603	0.954612	1.16731	1.30018	1.08068	0.186195	0.449923
970	0.00135472	0.00131778	0.00116258	0.00128004	0.00133065	0.00137765	0.00114575	1.01809	0.956542	1.01469	1.01784	1.00179	0.0302049	0.913163
973	0.0283511	0.0304565	0.0392124	0.0332295	0.0346491	0.0421969	0.0314321	0.818235	0.721771	1.24753	1.28114	1.01717	0.288432	0.912766
978	0.000201156	0.000167257	0.000232264	0.000198892	0.000179626	0.000182237	0.000182296	1.11986	0.917798	1.27411	1.30106	1.15321	0.176074	0.180192
979	0.000151129	0.000216892	0.000141018	8.48247e-05	0.000226302	0.000108727	0.000126499	0.667819	1.49484	1.11477	0.936916	1.05359	0.346832	0.777531
984	0.000895261	0.00120925	0.00054195	0.000837878	0.000337636	0.000402962	0.000294463	2.65156	3.0009	1.84047	1.1216	2.15363	0.842407	0.0714047
992	0.000295769	0.000135623	0.000162635	0.000151191	0.000142898	0.000121043	0.000159175	2.0698	1.12046	1.02174	1.28816	1.37504	0.476049	0.213192
993	0.000492739	0.000620791	0.000521338	0.000486342	0.000539644	0.000654477	0.000563321	0.913082	0.948531	0.925471	0.547787	0.833718	0.191186	0.180329
995	0.0007232	0.00177411	0.00110853	0.000398407	0.00110703	0.000877703	0.00143372	0.653282	1.02131	0.773188	1.12268	0.892615	0.216821	0.394933
996	0.000314398	0.000807973	0.000806389	0.000598958	0.000310472	0.000978155	0.000901161	1.01265	0.826017	0.894833	0.684186	0.85442	0.13718	0.123893
997	0.0204595	0.0226758	0.016355	0.0173723	0.015977	0.0189465	0.0129923	1.28056	1.19683	1.25882	1.09758	1.20845	0.0819847	0.0146955
1004	0.000838744	0.000697342	0.0022236	0.00126988	0.000523575	0.000967186	0.00167831	1.60196	0.721	1.32491	1.78091	1.35719	0.463764	0.221104
1012	0.00230294	0.00199468	0.00236537	0.0022069	0.00270013	0.00297392	0.00259609	0.852898	0.670724	0.911129	0.824261	0.814753	0.102596	0.0364731
1019	0.000119522	0.000254993	0.000169925	0.000216728	8.45525e-05	0.000217646	0.00019357	1.41358	1.1716	0.877847	0.988351	1.11284	0.234247	0.406392
1020	0.000785368	0.0010018	0.000708858	0.000827301	0.00049775	0.000822859	0.000608609	1.57784	1.21746	1.16472	1.10195	1.26549	0.213515	0.0887301
1022	0.00816222	0.00638898	0.00708733	0.00643175	0.00749074	0.00803808	0.00762395	1.08964	0.794839	0.929614	0.814711	0.907201	0.135359	0.263894
1024	0.000930008	0.000857433	0.000733241	0.000776281	0.000984596	0.00110632	0.000763579	0.944558	0.775033	0.960268	0.824957	0.876204	0.0905554	0.0716899
1025	0.000425129	0.000129856	0.000182996	0.000150362	0.00034414	0.000181275	0.000159175	1.23534	0.716346	1.14966	0.863645	0.991246	0.242573	0.947003
1029	0.000588398	0.000445145	0.000572114	0.000419561	0.000438831	0.000489559	0.000463574	1.34083	0.909278	1.23414	1.00821	1.12311	0.198876	0.303738
1032	0.000165363	0.000127059	0.000146548	0.000149947	0.000104638	0.000101414	0.000126499	1.58032	1.25288	1.15849	1.69442	1.42153	0.256463	0.0461733
1034	0.00126262	0.00160336	0.000851887	0.0012535	0.00103529	0.00106013	0.00083237	1.21958	1.51241	1.02345	1.25273	1.25204	0.200918	0.0870214
1035	0.0010512	0.00118391	0.00107058	0.00109878	0.00116805	0.00149331	0.00133072	0.899966	0.792809	0.804508	0.746904	0.811047	0.0642813	0.00981952
1037	0.000676522	0.000710624	0.000549994	0.000570338	0.00070454	0.000771478	0.000621985	0.960231	0.92112	0.884256	0.815394	0.89525	0.0616163	0.0424594
1038	0.00667898	0.00373279	0.00652979	0.0071539	0.00945591	0.00656786	0.0103886	0.706328	0.868341	0.628555	1.39209	0.898827	0.343674	0.597409
1041	0.00111233	0.00110945	0.00106555	0.000745172	0.000708557	0.000982004	0.000778675	1.56985	1.12979	1.36841	0.961453	1.25737	0.266968	0.14944
1042	0.000358983	0.0002688	0.000367752	0.000314204	0.000337636	0.000355046	0.000328668	1.06323	0.757086	1.11892	1.04985	0.99727	0.162892	0.975364
1046	0.00210869	0.00176258	0.00177039	0.00172574	0.00188426	0.00171576	0.00197354	1.11911	1.02728	0.897063	1.00784	1.01282	0.0911605	0.796719
1047	0.00376483	0.00414438	0.00423379	0.00433934	0.00251591	0.00276839	0.00299852	1.4964	1.49703	1.41196	1.4309	1.45907	0.0441505	0.000243184
1050	0.00322499	0.0028979	0.00351187	0.00294066	0.00299415	0.00335398	0.00328591	1.0771	0.864019	1.06876	0.877085	0.971741	0.117014	0.66215
1056	0.00187509	0.00218361	0.00160549	0.00183296	0.00267698	0.00293812	0.00145779	0.700447	0.743198	1.10131	0.779552	0.831128	0.183002	0.162136
1058	0.00413783	0.00653317	0.0055663	0.00496899	0.00459587	0.00711342	0.00594564	0.900338	0.918428	0.936198	0.551552	0.826629	0.183968	0.155955
1059	0.000125383	0.000117447	0.000234275	0.000131074	0.00012262	0.000124314	0.000138919	1.02253	0.944761	1.68641	1.13316	1.19671	0.335491	0.325562
1060	0.00295601	0.00739235	0.00239504	0.00355932	0.00570155	0.00905799	0.00431204	0.518458	0.816113	0.555429	0.373957	0.565989	0.184218	0.0180962
1063	0.0010512	0.00118391	0.00107058	0.00109878	0.00116805	0.00149331	0.00133072	0.899966	0.792809	0.804508	0.746904	0.811047	0.0642813	0.00981952
1064	0.00060326	0.000644036	0.000427326	0.000522637	0.000652317	0.000736263	0.000627526	0.924796	0.874737	0.680969	1.06102	0.885381	0.157374	0.241252
1065	0.000438525	0.00105353	0.000596497	0.000663043	0.000407459	0.000907531	0.000659246	1.07624	1.16087	0.904816	0.832144	0.993519	0.151394	0.937164
1066	0.0970425	0.0494578	0.0750113	0.0486133	0.154682	0.0533598	0.0880975	0.627367	0.926874	0.851458	0.710468	0.779041	0.135162	0.046793
1068	0.000218111	0.000185958	0.000228494	0.000172138	0.000189765	0.000235542	0.00019185	1.14938	0.789487	1.191	0.909733	1.0099	0.192238	0.924469
1078	0.000453177	0.000428192	0.000523097	0.000424539	0.000433284	0.000421051	0.000406822	1.04591	1.01696	1.28581	1.18064	1.13233	0.124725	0.12395
1081	0.00173756	0.00155652	0.0020582	0.00159425	0.00187201	0.00193572	0.00185697	0.928178	0.804105	1.10836	0.85834	0.924747	0.132529	0.338622
1088	0.00518087	0.00429468	0.00634579	0.00456146	0.00494039	0.00522812	0.00534869	1.04868	0.821458	1.18642	1.0348	1.02284	0.150691	0.781611
1091	0.0010443	0.000969462	0.00136694	0.000944064	0.00138479	0.00104301	0.00131123	0.754121	0.929488	1.04249	0.731035	0.864283	0.14821	0.164437
1092	0.0024323	0.00273169	0.0032698	0.00275546	0.00282581	0.00312517	0.00301744	0.860742	0.874094	1.08363	1.07869	0.97429	0.123542	0.705233
1093	0.00142903	0.00251952	0.00266626	0.00228114	0.001534	0.00293293	0.00288693	0.931571	0.859046	0.923565	0.741781	0.863991	0.0877036	0.0532303
1098	0.0368692	0.038686	0.0456087	0.0398293	0.0232676	0.0342726	0.0352896	1.58457	1.12878	1.29241	1.06757	1.26833	0.231205	0.102974
1099	0.00456003	0.00437263	0.003261	0.00416035	0.00311926	0.00316828	0.0028468	1.4619	1.38013	1.1455	1.3115	1.32476	0.134391	0.0168901
1104	0.102564	0.0689716	0.106857	0.0762604	0.0941094	0.084248	0.125214	1.08984	0.818674	0.853395	1.05252	0.953606	0.137346	0.547722
1105	0.000258719	0.000226855	0.000216428	0.000191633	0.000304733	0.000287115	0.000271724	0.849002	0.790116	0.796499	0.676796	0.778103	0.072509	0.0087673
1108	0.00430382	0.00423264	0.00430418	0.00363108	0.001591	0.00192841	0.00175933	2.7051	2.19489	2.44649	1.82792	2.2936	0.373859	0.00618561
1109	0.000979198	0.000920176	0.00100296	0.000897608	0.000956285	0.00104839	0.00105671	1.02396	0.8777	0.949138	0.768998	0.904949	0.108538	0.178161
1111	0.000265627	0.000340107	0.00026645	0.000278532	0.000207938	0.000356778	0.000289686	1.27743	0.953275	0.919789	0.90249	1.01325	0.177382	0.890746
1115	0.00633506	0.00938527	0.00525686	0.00685131	0.00692278	0.00815008	0.00527722	0.915104	1.15156	0.996143	0.84922	0.978006	0.130373	0.758039
1120	0.000136267	0.000147683	0.000164143	0.000147666	0.000218077	0.000212258	0.000277266	0.62486	0.695771	0.592008	0.570074	0.620678	0.0548913	0.000819863
1129	0.00448468	0.00537879	0.00285781	0.00454901	0.00385995	0.00391859	0.00302565	1.16185	1.37264	0.944525	1.15793	1.15923	0.174785	0.165979
1130	0.0527109	0.061307	0.0417445	0.0489126	0.013032	0.0157738	0.0123529	4.04473	3.88663	3.37931	3.53602	3.71167	0.307058	0.000395675
1131	0.0347814	0.0637645	0.0252185	0.0385484	0.0957698	0.121101	0.0495199	0.363177	0.526541	0.50926	0.455159	0.463534	0.0734903	0.000696879
1132	0.0182627	0.020889	0.0208452	0.0179932	0.0115506	0.0175252	0.015206	1.58111	1.19194	1.37085	1.00655	1.28761	0.245774	0.101179
1133	0.00131118	0.00118758	0.00100246	0.00110334	0.000795214	0.000824783	0.000746573	1.64884	1.43987	1.34274	1.39665	1.45702	0.133906	0.00643258
1140	0.00935262	0.0125092	0.00686009	0.00985025	0.00755004	0.00885247	0.00659074	1.23875	1.41307	1.04087	1.16275	1.21386	0.155823	0.071046
1145	0.00245344	0.00217452	0.00246492	0.00191488	0.00211687	0.0020481	0.00212239	1.15899	1.06172	1.16139	1.04492	1.10676	0.0620881	0.0412714
1146	0.00838451	0.00670165	0.00925311	0.00863678	0.00598677	0.00592435	0.0128744	1.40051	1.1312	0.718721	1.43323	1.17091	0.330442	0.376998
1151	0.00079102	0.000630229	0.000752596	0.000713026	0.000592441	0.000570575	0.000676062	1.33519	1.10455	1.11321	1.23068	1.19591	0.109229	0.0371003
1152	0.00958245	0.0102189	0.00905579	0.00794179	0.002637	0.00309861	0.00252616	3.63384	3.29791	3.58481	2.47401	3.24764	0.536614	0.00356732
1156	0.000512624	0.000438154	0.000412495	0.000347387	0.000258631	0.000273068	0.000267138	1.98207	1.60456	1.54413	1.27825	1.60225	0.290184	0.0254113
1158	0.00012915	0.000113952	0.000135487	0.000114068	0.000170061	0.000156066	0.000142741	0.759433	0.730149	0.949183	0.894219	0.833246	0.105256	0.050537
1165	0.000261859	0.000164636	0.000362976	0.000124852	0.000162984	0.000173385	0.000258921	1.60666	0.949535	1.40188	0.683769	1.16046	0.41996	0.500373
1173	0.0139143	0.00728102	0.0107382	0.00735383	0.0128946	0.00806848	0.00955009	1.07908	0.902402	1.12441	1.27536	1.09531	0.153561	0.302685
1177	0.000276721	0.00350733	0.000272986	0.000264637	0.000291151	0.000556142	0.000267329	0.950436	3.30654	1.02116	3.01954	2.07442	1.26281	0.18738
1185	0.0168431	0.0175368	0.0220943	0.0186372	0.0204271	0.0255402	0.018448	0.824549	0.686637	1.19765	1.22957	0.984601	0.270677	0.916597
1187	0.00106062	0.000855336	0.00105575	0.000843063	0.000948824	0.00103627	0.000909951	1.11783	0.825398	1.16022	0.922227	1.00642	0.159086	0.94076
1188	0.00123268	0.00142737	0.000888838	0.00124914	0.00103548	0.0012112	0.000902308	1.19045	1.17848	0.985072	1.12673	1.12018	0.0942212	0.0838662
1189	0.00141563	0.00219636	0.00066512	0.000467262	0.00222113	0.00216049	0.000825682	0.637347	1.01661	0.80554	0.177836	0.659332	0.356531	0.151975
1192	0.00022146	0.000192774	0.000221204	0.000199929	0.000207747	0.000262291	0.000207519	1.06601	0.734962	1.06594	0.92246	0.947344	0.156922	0.550204
1193	0.000393521	0.000187181	0.000168919	0.000182923	0.000510567	0.000230732	0.000192806	0.770754	0.811251	0.876112	0.822716	0.820208	0.0434264	0.00368966
1195	0.0101087	0.01584	0.00729822	0.0112218	0.00789858	0.0111311	0.00692438	1.27981	1.42304	1.05399	1.12232	1.21979	0.165228	0.0763097
1198	0.0074095	0.00738798	0.00749354	0.00760312	0.00949723	0.0107505	0.00899327	0.780175	0.687223	0.833239	0.823732	0.781092	0.0667073	0.00719386
1200	0.0104294	0.0138622	0.00554166	0.00698342	0.0189853	0.0123702	0.00620494	0.549339	1.12061	0.893105	0.375224	0.734571	0.335462	0.211694
1202	0.00186023	0.00212558	0.00182946	0.00183068	0.00210119	0.00262714	0.00188258	0.885321	0.809084	0.971783	0.68327	0.837365	0.122356	0.0764434
1207	0.0028974	0.00252494	0.00255491	0.002378	0.00287153	0.00298565	0.00241915	1.00901	0.845689	1.05612	0.896182	0.95175	0.0974818	0.395188
1209	0.000117219	9.35032e-05	0.000105323	0.000100587	0.000100047	0.000118156	8.94282e-05	1.17164	0.791353	1.17774	0.937013	1.01944	0.188892	0.85013
1213	0.00303828	0.0026305	0.00275248	0.00235809	0.0016503	0.00187606	0.00203678	1.84104	1.40214	1.35139	1.20627	1.45021	0.273456	0.0459835
1216	0.0219901	0.0263882	0.0161994	0.0185003	0.00221864	0.00256422	0.00199723	9.91151	10.2909	8.11095	7.07767	8.84776	1.51552	0.00192062
1229	0.00205133	0.00184228	0.0018639	0.00134537	0.00165623	0.00199903	0.00116677	1.23855	0.921584	1.59748	0.816486	1.14353	0.351814	0.474305
1230	0.000371333	0.000234195	0.00040973	0.000283924	0.000333428	0.000277686	0.000458797	1.11369	0.84338	0.893053	1.20257	1.01317	0.172464	0.888293
1231	0.000352076	0.000346049	0.000287062	0.000321878	0.000434814	0.000460693	0.000368223	0.809716	0.751149	0.77959	0.747541	0.771999	0.0289432	0.000555838
1233	0.000429106	0.000397957	0.00053089	0.000418939	0.000334001	0.000372365	0.000375293	1.28474	1.06873	1.4146	1.31055	1.26965	0.145237	0.0339636
1235	0.00560956	0.00688603	0.00325874	0.0034156	0.00776926	0.00975904	0.00734018	0.72202	0.705605	0.443959	0.482633	0.588554	0.145649	0.0109758
1236	0.000173945	0.000221611	0.000144788	0.00016799	0.000172931	0.000186856	0.000150385	1.00586	1.186	0.962785	0.923457	1.01953	0.115973	0.758492
1236	0.000173945	0.000221611	0.000144788	0.00016799	0.000172931	0.000186856	0.000150385	1.00586	1.186	0.962785	0.923457	1.01953	0.115973	0.758492
1238	0.0103793	0.00966316	0.0102211	0.0099919	0.00786797	0.00998996	0.00803306	1.31919	0.967287	1.27238	1.17603	1.18372	0.156114	0.0999714
1240	0.000613935	0.000549135	0.00067794	0.000624675	0.000679863	0.000821704	0.00088167	0.903027	0.668287	0.768927	0.829806	0.792512	0.0993184	0.024973
1242	0.00134676	0.000371566	0.000712126	0.00043076	0.00115389	0.000471855	0.00102709	1.16715	0.787459	0.693346	1.36714	1.00377	0.31722	0.982513
1243	0.00240069	0.00331735	0.0045465	0.00357612	0.00296393	0.00319272	0.00302355	0.809969	1.03904	1.50369	1.18407	1.13419	0.290514	0.423711
1245	0.00374264	0.00577203	0.0111024	0.0079897	0.00260142	0.00727834	0.0075028	1.43869	0.793043	1.47977	1.34495	1.26411	0.319076	0.1964
1246	0.0104306	0.0120083	0.0148184	0.0121208	0.013269	0.0148867	0.0133045	0.786089	0.806643	1.11379	0.986532	0.923262	0.15569	0.396927
1248	0.0104139	0.0152721	0.00928454	0.0102503	0.00309879	0.00382391	0.00251641	3.36062	3.99385	3.6896	2.94263	3.49668	0.450881	0.00157717
1249	0.000627959	0.000908991	0.000417271	0.000470995	0.000569486	0.000652553	0.00047504	1.10268	1.39298	0.878392	0.800498	1.04364	0.265799	0.764235
1252	0.0567546	0.0628051	0.0680853	0.0673782	0.0604051	0.0724204	0.0568366	0.939566	0.867229	1.19791	1.20793	1.05316	0.175481	0.587369
1255	0.000901331	0.000767425	0.000779744	0.000757408	0.00104734	0.000974307	0.000835237	0.86059	0.787663	0.933561	0.823177	0.851248	0.0624332	0.0175524
1257	0.000725921	0.000616247	0.000704334	0.000718418	0.000632231	0.000612911	0.000641858	1.14819	1.00544	1.09734	1.01795	1.06723	0.0675935	0.140783
1261	0.000890237	0.000856035	0.000972041	0.000778148	0.00070301	0.000695851	0.000732432	1.26632	1.2302	1.32714	1.2269	1.26264	0.0465603	0.00149346
1266	0.00341945	0.00237253	0.00361317	0.00240288	0.00339166	0.00284287	0.00419243	1.00819	0.834557	0.861832	0.889393	0.898494	0.076482	0.0767055
1270	0.0119235	0.00938772	0.0134774	0.0121169	0.0085421	0.00847799	0.017864	1.39585	1.10731	0.75444	1.38985	1.16186	0.303148	0.363882
1271	0.00191653	0.00226662	0.00142802	0.00149428	0.00176393	0.00222072	0.00138442	1.08651	1.02067	1.0315	0.756832	0.973878	0.147541	0.746687
1272	0.000397917	0.00037978	0.00043537	0.000343654	0.000385651	0.000383141	0.000375866	1.03181	0.991228	1.15831	1.1284	1.07744	0.0788504	0.14427
1274	0.00135702	0.000987639	0.00119777	0.000949664	0.00122104	0.00117675	0.00119562	1.11137	0.839293	1.00179	1.04897	1.00036	0.116376	0.995491
1283	0.00184871	0.00154569	0.00178547	0.00157952	0.00171898	0.00195785	0.00172054	1.07547	0.789482	1.03774	0.997881	0.975143	0.127764	0.723174
1288	0.00165384	0.0013232	0.00154566	0.00121534	0.00124036	0.00154835	0.00143964	1.33335	0.854591	1.07364	0.84337	1.02624	0.230558	0.834573
1292	0.000247625	0.000220912	0.000242822	0.000234979	0.000228215	0.000232079	0.000235227	1.08505	0.951886	1.03229	1.06008	1.03233	0.0577963	0.344782
1294	0.00048018	0.000238739	0.000479611	0.000200137	0.000379338	0.000354083	0.000575169	1.26583	0.674245	0.833861	0.686243	0.865046	0.276875	0.401538
1296	0.00339391	0.00616282	0.00224145	0.00144658	0.00464254	0.00523678	0.00153767	0.731046	1.17683	1.45769	0.303513	0.917272	0.506889	0.765556
1297	0.000261022	0.000330495	0.000302396	0.000272518	0.000346244	0.000305397	0.00026045	0.753866	1.08218	1.16105	1.00527	1.00059	0.176351	0.995061
1298	0.000527486	0.000526065	0.000479611	0.000396748	0.000469438	0.000494562	0.000360388	1.12365	1.0637	1.33082	0.876803	1.09874	0.187051	0.368574
1300	0.01313	0.0113048	0.0139379	0.0114951	0.0095221	0.0111307	0.0103773	1.3789	1.01564	1.34311	1.2763	1.25349	0.164167	0.0537908
1305	0.00262801	0.0041671	0.00343997	0.0030707	0.00254805	0.00339343	0.00383701	1.03138	1.22799	0.896526	0.754585	0.97762	0.201574	0.838534
1316	0.000546743	0.000631103	0.000151324	0.000286621	0.000575799	0.000474356	0.000171022	0.949539	1.33044	0.88482	0.851384	1.00405	0.221378	0.973137
1322	0.00045841	0.00036108	0.000456736	0.000467262	0.000320228	0.000289425	0.000399752	1.43151	1.24758	1.14255	1.66623	1.37197	0.229668	0.047881
1323	0.0075464	0.00947808	0.00510755	0.00724889	0.00618821	0.0071011	0.00496518	1.21948	1.33473	1.02867	1.15659	1.18487	0.127611	0.0626356
1326	0.0119164	0.00863812	0.0114405	0.00876412	0.00783622	0.00902836	0.009312	1.52068	0.956777	1.22858	1.03189	1.18448	0.251731	0.23898
1327	0.0200007	0.0221332	0.0196565	0.0237503	0.02368	0.0229065	0.0210653	0.844623	0.96624	0.933121	0.905874	0.912464	0.0515246	0.0425296
1329	9.00075e-05	0.000110806	0.000153837	0.000125889	8.81871e-05	0.000104878	0.000143697	1.02064	1.05652	1.07057	0.925289	1.01826	0.065446	0.615852
1333	0.000168921	0.00014611	0.000151072	0.000135222	0.000181348	0.000185316	0.000158601	0.931476	0.788433	0.952529	0.761092	0.858382	0.0975781	0.0623676
1334	0.000448782	0.000490236	0.000411741	0.000519733	0.000516114	0.00058597	0.000463574	0.869539	0.836624	0.888188	0.9823	0.894163	0.0625056	0.0428857
1335	0.00481184	0.00491792	0.00404301	0.00400418	0.00397817	0.00449089	0.0031491	1.20956	1.09509	1.28386	0.928774	1.12932	0.15461	0.192946
1336	0.0344247	0.0332683	0.0396352	0.0321233	0.0223618	0.0272877	0.0246707	1.53944	1.21917	1.60657	1.44385	1.45226	0.16913	0.0127866
1337	0.00101248	0.000228427	0.000193554	0.000240994	0.00100162	0.000273452	0.000267329	1.01084	0.835346	0.724027	1.41882	0.997258	0.304833	0.986778
1338	0.0144205	0.0191517	0.0101141	0.01397	0.0133031	0.0154144	0.00955296	1.084	1.24246	1.05873	1.002	1.0968	0.102982	0.156711
1340	0.000558675	0.00056032	0.00042255	0.000494016	0.000342036	0.000406426	0.000393637	1.63338	1.37865	1.07345	0.992987	1.26962	0.293949	0.163941
1349	0.00422554	0.00378644	0.00378686	0.00286123	0.0041249	0.00442008	0.00326356	1.0244	0.856646	1.16035	0.642674	0.921017	0.223298	0.530305
1351	0.00127559	0.00150129	0.0018742	0.00134289	0.00172778	0.00142114	0.00139875	0.738286	1.0564	1.33991	0.869851	1.00111	0.260863	0.993733
1353	0.00245344	0.00217452	0.00246492	0.00191488	0.00211687	0.0020481	0.00212239	1.15899	1.06172	1.16139	1.04492	1.10676	0.0620881	0.0412714
1356	0.00816745	0.00356081	0.00720572	0.00419105	0.00609792	0.00291291	0.00576086	1.33938	1.22242	1.25081	2.04732	1.46498	0.391406	0.0979746
1357	0.00051995	0.000344476	0.00051807	0.00035755	0.000383164	0.000650051	0.000406822	1.35699	0.529922	1.27346	0.937653	1.02451	0.376244	0.904602
1365	0.0494281	0.0617488	0.0401179	0.049229	0.0492681	0.0608206	0.0421463	1.00325	1.01526	0.951872	0.873706	0.961022	0.0643766	0.312614
1366	0.000375101	0.000320008	0.000351161	0.000286413	0.000324819	0.000423745	0.000318158	1.1548	0.75519	1.10373	0.926496	0.985054	0.18181	0.879862
1367	0.000154478	0.000137371	0.000147302	0.000116764	0.000159349	0.000147406	0.000138919	0.969433	0.93192	1.06034	0.917799	0.969873	0.064126	0.416728
1370	0.000279651	0.000311969	0.000274745	0.000262977	0.000330367	0.000363705	0.000302489	0.846487	0.857751	0.908282	0.777623	0.847536	0.0538002	0.0108789
1375	0.00042764	0.000507189	0.000355183	0.000441545	0.000321759	0.00048648	0.000374528	1.32907	1.04257	0.948348	1.2869	1.15172	0.185294	0.20002
1377	0.0011274	0.000334339	0.000328035	0.000311923	0.00113304	0.000446068	0.000390771	0.995018	0.749526	0.839458	0.792238	0.84406	0.107132	0.0619372
1380	0.000424082	0.000476429	0.000498212	0.000441338	0.000499472	0.000551331	0.000503894	0.849061	0.864144	0.988724	0.799483	0.875353	0.0804698	0.0533797
1382	4.60098e-05	4.648e-05	4.63629e-05	4.05556e-05	1.74571e-05	2.17167e-05	2.55586e-05	2.63559	2.14028	1.81398	2.4509	2.26019	0.360913	0.0060272
1383	0.0139143	0.00728102	0.0107382	0.00735383	0.0128946	0.00806848	0.00955009	1.07908	0.902402	1.12441	1.27536	1.09531	0.153561	0.302685
1388	0.00116319	0.00180627	0.000540944	0.00065454	0.00234031	0.0020483	0.00122486	0.497025	0.881842	0.441637	0.21586	0.509091	0.276661	0.0381228
1400	0.000286349	0.000195745	0.000238297	0.000167783	0.000243519	0.000234773	0.000231978	1.17588	0.833764	1.02724	0.766927	0.950953	0.1862	0.634789
1405	0.00143154	0.00183756	0.00209666	0.00184375	0.00148942	0.0021882	0.00205398	0.961135	0.839758	1.02078	0.867068	0.922185	0.0838051	0.1603
1407	0.00387263	0.00325601	0.00379189	0.00353194	0.00463986	0.00475222	0.00394344	0.834642	0.685155	0.961569	0.843121	0.831122	0.113254	0.0584891
1412	0.00408236	0.00428577	0.00502988	0.00417923	0.0042808	0.00507744	0.00519735	0.953644	0.84408	0.967778	0.870254	0.908939	0.0610022	0.0583401
1414	0.0115467	0.00745876	0.0433585	0.11169	0.0104612	0.013475	0.114636	1.10377	0.553526	0.378229	1.00332	0.759711	0.349172	0.262457
1419	0.00178194	0.00172098	0.00165953	0.00171371	0.00162218	0.0018776	0.00154665	1.09848	0.916585	1.07299	1.06494	1.03825	0.0823597	0.421497
1420	0.000424919	0.000363526	0.000449949	0.000405043	0.000279291	0.000249783	0.000317012	1.52142	1.45537	1.41935	1.67343	1.51739	0.112287	0.00270268
1428	0.000238415	0.000309172	0.000513545	0.000633593	0.000716592	0.000563647	0.00039937	0.832707	0.548521	1.28589	1.20719	0.968576	0.342797	0.866224
1429	0.0027536	0.00225631	0.00232566	0.00230748	0.00255245	0.00236062	0.00233717	1.07881	0.955813	0.995074	1.0126	1.01057	0.0513122	0.707943
1435	0.000336796	0.000291695	0.000325019	0.000262355	0.000347392	0.000316751	0.000322362	0.969497	0.920898	1.00824	0.88262	0.945314	0.0549896	0.140828
1437	0.00214511	0.00384569	0.00126941	0.00207976	0.00159731	0.00227941	0.00115569	1.34295	1.68714	1.0984	0.983955	1.27811	0.311091	0.171737

## Sheet: mix-4
Supplementary Table 1. BI measurement of compounds in mix-4 from four individual MS affinity assays
Hits are in bold red with mean BI >2.0 and p <0.05
Cpd ID	BI-1	BI-2	BI-3	BI-4	Mean	s.d.	p-value	BI-1	BI-2	BI-3	BI-4	Mean	s.d.	p-value
1441	0.00293047	0.00316581	0.00282655	0.00383064	0.00295509	0.00480498	0.00538251	0.991669	0.658859	0.525136	0.647645	0.705827	0.199955	0.0603937
1445	0.00852228	0.0139657	0.00839802	0.0142503	0.00967603	0.0106986	0.0114189	0.880761	1.30538	0.73545	1.29215	1.05343	0.289476	0.736511
1448	0.000197384	0.000307328	0.000249279	0.000267926	0.000190894	0.000221051	0.000218467	1.034	1.39031	1.14104	1.26551	1.20771	0.154168	0.074122
1449	0.0272316	0.0449406	0.0471974	0.0349264	0.00876773	0.0132445	0.0131467	3.10589	3.39316	3.59004	2.79737	3.22161	0.345706	0.00101651
1457	0.00132836	0.00253941	0.00289074	0.00168013	0.00171529	0.00261348	0.00288831	0.774422	0.971658	1.00084	0.54568	0.82315	0.210549	0.19157
1458	0.00015185	0.000147997	0.000130233	0.000156192	0.000526224	0.000562223	0.00063156	0.288564	0.263234	0.206209	0.250077	0.252021	0.034466	2.69187e-05
1471	0.00625958	0.00558512	0.0055339	0.00712369	0.00972654	0.010036	0.0118414	0.643556	0.556509	0.467334	0.633856	0.575314	0.0818485	0.00190931
1474	0.0133321	0.0207087	0.0172183	0.0182678	0.0135682	0.0202443	0.0192164	0.9826	1.02294	0.89602	0.884879	0.946611	0.0670623	0.209574
1476	8.78166e-05	0.000111741	0.000141497	0.000114814	9.9644e-05	0.000143265	0.000103499	0.881304	0.77996	1.36714	1.02889	1.01432	0.256456	0.918116
1490	0.000379251	0.00069818	0.000660115	0.000454756	0.000435771	0.000543948	0.000703571	0.8703	1.28354	0.938234	0.619566	0.927911	0.273846	0.634989
1491	5.35979e-05	7.67717e-05	7.26774e-05	5.12479e-05	4.63124e-05	5.10611e-05	4.97685e-05	1.15731	1.50352	1.46031	0.964493	1.27141	0.256109	0.124243
1499	0.000149071	0.000143173	0.000135942	0.000177907	0.000208189	0.000237489	0.000224653	0.71604	0.602861	0.60512	0.773508	0.674382	0.0846047	0.00455683
1504	0.000217102	0.000168817	0.00020916	0.000317674	0.000360585	0.000281938	0.000380423	0.602083	0.598774	0.549808	0.803731	0.638599	0.112653	0.00767192
1506	4.39761e-05	4.11593e-05	3.81904e-05	4.85631e-05	4.77596e-05	4.23367e-05	4.31652e-05	0.920779	0.97219	0.88475	1.24376	1.00537	0.162929	0.951584
1508	0.0010126	0.00133534	0.00106756	0.00127535	0.00112221	0.00144229	0.00172181	0.90233	0.925848	0.620019	0.784261	0.808115	0.139865	0.0711072
1514	0.00231034	0.00303019	0.003003	0.00299015	0.00263271	0.00434653	0.00402409	0.877549	0.697151	0.746255	0.741024	0.765495	0.0778802	0.00917678
1515	0.00520957	0.00947282	0.0070754	0.00776923	0.00501317	0.00791135	0.00820451	1.03918	1.19737	0.86238	0.825683	0.981152	0.171654	0.840277
1519	0.000949449	0.00141983	0.00149976	0.00104272	0.00111656	0.00157105	0.00156159	0.850332	0.903749	0.960406	0.53841	0.813224	0.188642	0.142028
1520	0.00103029	0.00190474	0.00166201	0.00123714	0.0010133	0.00215706	0.00227072	1.01676	0.883028	0.731931	0.711784	0.835877	0.142766	0.105067
1525	7.73816e-05	8.61772e-05	6.6891e-05	9.49942e-05	0.000103335	9.80815e-05	0.000108365	0.748846	0.878629	0.617277	0.815147	0.764975	0.111817	0.0245742
1526	0.000512467	0.00037799	0.00045489	0.000436278	0.000630934	0.000484897	0.0004092	0.812235	0.779526	1.11166	1.27273	0.994037	0.238447	0.963255
1527	4.74318e-05	7.33953e-05	5.81728e-05	5.43275e-05	5.34763e-05	6.5204e-05	6.75629e-05	0.886968	1.12563	0.861017	0.912995	0.946652	0.121189	0.443462
1529	0.00625958	0.00558512	0.0055339	0.00712369	0.00972654	0.010036	0.0118414	0.643556	0.556509	0.467334	0.633856	0.575314	0.0818485	0.00190931
1532	0.00371364	0.0105746	0.00992394	0.00881424	0.00343566	0.00835676	0.00995378	1.08091	1.26539	0.997003	0.824277	1.0419	0.183344	0.678725
1533	0.000372746	0.000370353	0.000318793	0.000367027	0.000483386	0.000597489	0.000817566	0.771116	0.619849	0.389929	0.49389	0.568696	0.164463	0.0134937
1534	0.0020769	0.00379308	0.0039782	0.00340597	0.00285313	0.00277163	0.00342423	0.727938	1.36854	1.16178	0.868662	1.03173	0.288233	0.83987
1535	0.000125017	0.000104667	9.33542e-05	0.000132581	0.000217813	0.000230785	0.000275812	0.573964	0.453524	0.33847	0.495823	0.465445	0.0982578	0.00166132
1536	0.00109839	0.00206616	0.00204353	0.00206895	0.0011408	0.00176032	0.00171486	0.962816	1.17374	1.19166	1.1288	1.11425	0.104364	0.116306
1537	0.000855941	0.00425725	0.00352956	0.00122869	0.00127554	0.0031376	0.00382258	0.67104	1.35685	0.923344	0.298715	0.812487	0.444444	0.460745
1538	0.00638202	0.00539347	0.00508572	0.00579062	0.00666797	0.00437757	0.00501063	0.957115	1.23207	1.01499	1.11145	1.07891	0.120328	0.28103
1539	5.04132e-05	0.000131597	8.62562e-05	6.24608e-05	5.5213e-05	8.49488e-05	7.97965e-05	0.913067	1.54913	1.08095	0.843568	1.09668	0.317669	0.585726
1546	0.000117766	6.4231e-05	9.89864e-05	0.000116867	0.000134089	9.13774e-05	0.00010899	0.878272	0.70292	0.908213	0.957873	0.861819	0.110903	0.088334
1547	0.00278818	0.00379035	0.00389287	0.0037212	0.0032072	0.00411391	0.00505192	0.869348	0.92135	0.770572	0.794562	0.838958	0.0691847	0.0186973
1548	0.00264439	0.00377098	0.00338992	0.00334596	0.0028087	0.00356317	0.00296317	0.941499	1.05832	1.14402	1.08263	1.05662	0.0847945	0.274024
1551	0.00467352	0.000930907	0.00569461	0.0149768	0.0049416	0.00199451	0.00262765	0.94575	0.766735	1.86718	1.62408	1.30094	0.528075	0.337148
1555	4.0046e-05	7.11444e-05	6.31877e-05	0.000131239	4.52269e-05	5.85917e-05	6.16546e-05	0.885446	1.21424	1.02487	2.03154	1.28902	0.513021	0.341838
1556	0.000431697	0.00040685	0.000456973	0.000452624	0.000454802	0.000402428	0.000365062	0.949198	1.01099	1.25177	1.16888	1.09521	0.139463	0.265512
1557	0.231933	0.242472	0.246826	0.233736	0.193405	0.251766	0.24249	1.19921	0.963083	1.01788	0.881157	1.01533	0.134846	0.834729
1558	0.000798277	0.000904941	0.000869275	0.00096684	0.000872699	0.000899264	0.000885199	0.914722	1.00631	0.982011	1.13736	1.0101	0.0932632	0.842413
1563	0.000589577	0.00079529	0.00112233	0.00141394	0.000601193	0.000658009	0.000819582	0.98068	1.20863	1.3694	1.23806	1.19919	0.161573	0.0904114
1566	0.00354837	0.00285768	0.00332357	0.00305292	0.00297933	0.00289735	0.00280129	1.191	0.986306	1.18644	0.893347	1.06427	0.148637	0.450748
1568	0.0057612	0.0114592	0.0112009	0.00793798	0.00405725	0.00759856	0.00765261	1.41998	1.50808	1.46367	0.996625	1.34709	0.236395	0.0606807
1573	0.00030065	8.57753e-05	7.18288e-05	6.25398e-05	0.000500463	0.00010102	5.17843e-05	0.600743	0.84909	1.38708	1.02771	0.966154	0.330753	0.850938
1575	0.00718965	0.0073995	0.00682666	0.00603793	0.0089194	0.00412677	0.00236936	0.806068	1.79305	2.88123	1.54213	1.75562	0.859385	0.1769
1577	8.72745e-05	4.19632e-05	7.13658e-05	4.54045e-05	6.75871e-05	9.15611e-05	3.48936e-05	1.29129	0.458308	2.04524	1.34039	1.28381	0.649228	0.446312
1578	0.000393887	0.000522771	0.000500178	0.000608184	0.000369341	0.000319408	0.0004304	1.06646	1.63669	1.16212	1.35413	1.30485	0.251494	0.0938058
1580	0.000260875	0.000430725	0.000425495	0.00042854	0.000414206	0.000430438	0.00051541	0.629819	1.00067	0.825546	0.880267	0.834075	0.154575	0.121066
1585	4.20788e-05	5.06452e-05	7.11344e-05	6.30926e-05	4.92069e-05	5.01428e-05	3.21132e-05	0.85514	1.01002	2.21511	1.41969	1.37499	0.608619	0.305621
1589	0.000178276	0.00035733	0.000303208	0.000189909	0.000193861	0.000355867	0.000343445	0.919608	1.00411	0.882845	0.542856	0.837355	0.202791	0.207037
1591	0.000115395	0.000585635	0.000664358	0.000306935	0.000115419	0.000498948	0.000437768	0.999789	1.17374	1.5176	0.727585	1.10468	0.330896	0.571863
1595	0.000503251	0.000505568	0.000538831	0.000501898	0.000461532	0.000441642	0.000524168	1.09039	1.14475	1.02797	0.905621	1.04218	0.102785	0.471904
1601	0.00117129	0.0020238	0.0017215	0.00102433	0.00116085	0.00210278	0.00286989	1.009	0.962438	0.599848	0.389016	0.740075	0.297025	0.178391
1611	0.000106518	0.000126372	0.000132085	8.70188e-05	7.73562e-05	0.000114704	9.5436e-05	1.37699	1.10172	1.38401	1.60156	1.36607	0.204759	0.037402
1613	0.000223743	0.000157724	0.000191029	0.000173564	0.000210142	0.000199836	0.000126993	1.06472	0.789264	1.50425	1.14764	1.12647	0.294779	0.453949
1617	0.0080317	0.0068543	0.00776028	0.00799064	0.00764639	0.00722478	0.0082148	1.05039	0.948721	0.944671	0.897206	0.960247	0.0644862	0.305413
1618	0.000812033	0.000346156	0.000729475	0.000946625	0.00127786	0.000616866	0.000681954	0.635463	0.561152	1.06968	1.25935	0.881412	0.337313	0.532628
1620	8.86297e-05	2.65284e-05	5.18463e-05	0.000234524	0.000125478	0.000116173	0.000112327	0.706339	1.22835	2.46157	2.44239	1.70966	0.883282	0.20644
1624	0.00371635	0.00191768	0.0021473	0.00494522	0.00504421	0.00201682	0.00291111	0.736755	0.950844	0.737623	2.0025	1.10693	0.605485	0.747293
1625	0.00238392	0.00237526	0.00190173	0.00256705	0.00271398	0.00239905	0.00220545	0.878387	0.990085	0.862283	0.989898	0.930163	0.0693959	0.137623
1626	5.2175e-05	6.84916e-05	6.26476e-05	6.55405e-05	5.74563e-05	5.48264e-05	6.1307e-05	0.908081	1.24924	1.02187	1.13429	1.07837	0.146647	0.363507
1627	0.0144317	0.0185499	0.0203691	0.0140362	0.0114195	0.018439	0.0192261	1.26377	1.00601	1.05945	0.785624	1.02871	0.196472	0.789107
1628	0.00257934	0.0025411	0.00254587	0.00293053	0.00260203	0.00259007	0.00307592	0.99128	0.981095	0.827678	0.917125	0.929295	0.075276	0.156917
1632	3.42864e-05	4.43748e-05	4.32824e-05	5.96971e-05	2.511e-05	3.46224e-05	4.44163e-05	1.36545	1.28168	0.974471	1.37103	1.24816	0.186978	0.076705
1633	0.000450602	0.000952692	0.000730786	0.000606289	0.000437001	0.000493162	0.000477806	1.03112	1.9318	1.52946	1.30421	1.44915	0.380857	0.099524
1643	0.00587958	0.00131702	0.00188383	0.00234303	0.00423245	0.00300792	0.00452602	1.08917	0.437849	0.716222	0.587994	0.707808	0.278532	0.126796
1645	3.86908e-05	5.1851e-05	6.18761e-05	5.91443e-05	3.84248e-05	4.47244e-05	4.29566e-05	1.00692	1.15935	1.44043	1.23311	1.20995	0.180222	0.102153
1646	0.0289178	0.00788948	0.00842557	0.0099507	0.0297794	0.0119857	0.00939013	0.971069	0.658242	0.897279	1.89614	1.10568	0.543622	0.723372
1649	0.00187572	0.00197822	0.0017826	0.00193455	0.00187695	0.00172359	0.0018048	0.999345	1.14773	0.987699	0.982665	1.02936	0.079223	0.512318
1652	0.000127524	0.000367379	0.000275974	0.000181697	0.000126925	0.000227663	0.000190872	1.00472	1.6137	1.44586	1.18788	1.31304	0.270037	0.103227
1655	7.98887e-05	4.87962e-05	7.12887e-05	8.37812e-05	7.04093e-05	5.36326e-05	6.92311e-05	1.13463	0.909825	1.02972	1.19183	1.0665	0.124162	0.362595
1659	0.000123255	0.000172998	0.000192726	0.000150585	0.00019813	0.000176234	0.000205121	0.622091	0.981633	0.939572	0.637074	0.795092	0.191982	0.122471
1667	0.000614242	0.000720126	0.000699771	0.000757269	0.000708869	0.000824325	0.000842103	0.86651	0.873595	0.83098	0.832614	0.850925	0.0222853	0.000902725
1675	0.000293738	0.000499217	0.000576096	0.000426724	0.000429403	0.000458173	0.000520971	0.684063	1.08958	1.10581	0.665029	0.886122	0.24452	0.420332
1680	0.00037505	0.000494795	0.00041315	0.000574861	0.000585562	0.000599693	0.000675559	0.640496	0.825082	0.611568	0.857439	0.733646	0.125519	0.0239603
1681	0.000715001	0.00100712	0.00091464	0.000899089	0.00095816	0.000682346	0.00103722	0.746223	1.47596	0.881823	1.01463	1.02966	0.317072	0.863534
1682	0.00116825	0.00112673	0.00184757	0.000908564	0.00156934	0.00212372	0.00154074	0.744419	0.530548	1.19914	0.737793	0.802975	0.28216	0.256938
1685	8.78844e-05	0.000160055	0.000144198	9.66524e-05	8.40859e-05	9.35815e-05	0.000101275	1.04517	1.71033	1.42383	0.925165	1.27612	0.3591	0.0707491
1686	0.000302818	0.000960651	0.000976593	0.000997005	0.000387287	0.00104574	0.000867891	0.781895	0.91863	1.12525	1.0808	0.976643	0.157293	0.22169
1689	0.000341577	0.000305318	0.000279677	0.000365763	0.00047984	0.000531091	0.000582486	0.711856	0.574889	0.480143	0.683455	0.612586	0.106206	0.785849
1690	0.0819806	0.0581416	0.0486578	0.0567633	0.0595851	0.0480029	0.040474	1.37586	1.21121	1.2022	1.46298	1.31306	0.127909	0.00531716
1695	0.0023827	0.00313325	0.0026231	0.00215399	0.00279734	0.00307028	0.00216444	0.851774	1.02051	1.2119	0.922481	1.00167	0.156304	0.0163125
1701	0.00090405	0.00091298	0.000767974	0.000902721	0.000519205	0.000954274	0.000541546	1.74122	0.956728	1.41811	1.59924	1.42882	0.34138	0.984319
1704	0.00108971	0.000607983	0.00175876	0.0037366	0.00203051	0.00268402	0.00280622	0.536669	0.82652	0.626737	1.0068	0.749182	0.210162	0.0867619
1705	0.00120788	0.00204791	0.00205487	0.00222024	0.00177492	0.00176244	0.00200478	0.680528	1.16198	1.02499	1.10318	0.992667	0.215526	0.0970123
1709	0.00433073	0.00436168	0.00381888	0.00476755	0.00665885	0.00646135	0.00804471	0.650371	0.675042	0.474707	0.599284	0.599851	0.0891948	0.950032
1711	0.000384807	0.000529524	0.000530422	0.000466838	0.00043881	0.000379744	0.000427968	0.876934	1.39442	1.2394	1.06756	1.14458	0.222843	0.00292178
1715	0.0627193	0.0541279	0.062806	0.0453158	0.0710441	0.0809416	0.0686829	0.882823	0.668728	0.914433	0.713443	0.794857	0.121893	0.285193
1718	0.00222882	0.00210097	0.0025873	0.00271266	0.00189418	0.0019597	0.00292814	1.17667	1.07209	0.883599	1.04108	1.04336	0.121279	0.0435405
1719	0.00127429	0.000956631	0.00116662	0.0011986	0.00119927	0.00130849	0.00136481	1.06255	0.731097	0.854784	0.699048	0.83687	0.164758	0.526203
1724	0.00367847	0.00160344	0.00325096	0.00477269	0.00272389	0.00195254	0.00108114	1.35045	0.82121	3.00697	1.87643	1.76376	0.934074	0.142025
1725	0.000800852	0.000778489	0.000830313	0.000828495	0.000676088	0.000656815	0.000773567	1.18454	1.18525	1.07336	0.945842	1.09725	0.11381	0.200493
1727	0.00324298	0.000188995	6.8897e-05	0.00258553	0.00430126	0.000134357	0.000146178	0.75396	1.40666	0.471323	1.16955	0.950374	0.418053	0.185998
1728	0.0386951	0.034116	0.0387277	0.0423951	0.0438712	0.0376632	0.0304347	0.882017	0.905817	1.27248	1.23425	1.07364	0.208341	0.422138
1730	0.00864743	0.0176736	0.0130811	0.0159703	0.0098882	0.0156633	0.0173648	0.87452	1.12835	0.753312	0.954435	0.927654	0.157283	0.530573
1735	0.000782354	0.000940956	0.000891031	0.00103641	0.00101511	0.00100837	0.00121856	0.770709	0.933149	0.731214	0.806467	0.810385	0.0874236	0.425447
1740	0.000391854	0.000542627	0.000542072	0.000478603	0.000450894	0.000396275	0.00043756	0.86906	1.36932	1.23885	1.0568	1.13351	0.217961	0.0226061
1746	8.83587e-05	0.000153785	0.000125218	0.00011363	0.000282216	0.000251357	0.000217772	0.313089	0.611818	0.574996	0.768094	0.566999	0.188841	0.307966
1749	4.02493e-05	6.64015e-05	4.54427e-05	6.45929e-05	4.15364e-05	4.94999e-05	4.06628e-05	0.969012	1.34145	1.11755	1.37903	1.20176	0.193391	0.0194733
1750	0.0356741	0.0508295	0.050001	0.0475725	0.0457498	0.0548365	0.054072	0.779767	0.926928	0.924711	1.03112	0.915632	0.103292	0.1282
1751	0.000602926	0.00054126	0.000438611	0.000695992	0.000675292	0.000786029	0.000851209	0.892837	0.688601	0.51528	0.764989	0.715427	0.157807	0.200854
1752	0.00462819	0.0014507	0.00144174	0.00174946	0.00491085	0.00189376	0.0016858	0.942442	0.766043	0.855226	1.95036	1.12852	0.552607	0.0365913
1754	0.00119196	0.00112738	0.00110243	0.00141544	0.00116866	0.000886498	0.00133819	1.01993	1.27172	0.823821	1.0975	1.05324	0.185683	0.673519
1758	0.0742224	0.0109996	0.00891656	0.0200105	0.104871	0.0267761	0.0255585	0.707746	0.710799	0.648869	1.38853	0.863987	0.350857	0.606482
1759	0.00639645	0.00602308	0.00688916	0.00683926	0.00581626	0.00579131	0.00632283	1.09975	1.04002	1.08957	0.941287	1.04266	0.0724423	0.494655
1760	0.00105265	0.00155047	0.00141721	0.00117918	0.00121215	0.00100451	0.00141256	0.86841	1.54351	1.00329	0.849493	1.06617	0.325506	0.323837
1763	0.000313389	0.000159412	0.000166726	0.000252291	0.000348863	0.000388101	0.000117192	0.898316	0.410748	1.42267	1.83558	1.14183	0.620197	0.711572
1764	6.73532e-05	0.000103943	9.90635e-05	9.16777e-05	9.19011e-05	0.000130041	0.0001557	0.732887	0.799314	0.636244	0.6452	0.703411	0.0773866	0.6785
1765	0.00903183	0.0184814	0.0135935	0.0164953	0.0102462	0.0163544	0.0178944	0.881482	1.13005	0.759652	0.952981	0.931042	0.154831	0.00461237
1766	0.0144317	0.0185499	0.0203691	0.0140362	0.0114195	0.018439	0.0192261	1.26377	1.00601	1.05945	0.785624	1.02871	0.196472	0.438686
1767	0.00135492	0.00171414	0.0015523	0.00163859	0.00140717	0.00208432	0.002279	0.962869	0.822396	0.681135	0.839651	0.826513	0.115351	0.789107
1770	0.00199159	0.00235476	0.00254471	0.00220477	0.0019135	0.00196466	0.0020622	1.04081	1.19856	1.23398	0.994431	1.11695	0.117138	0.0573029
1778	0.000108009	0.000123237	0.000122595	0.000116236	0.000107821	0.000102857	0.000108087	1.00174	1.19814	1.13423	1.02511	1.0898	0.0924655	0.139769
1779	0.00110652	0.00133028	0.00145	0.00165652	0.00114269	0.00126523	0.00144899	0.968347	1.05141	1.0007	1.10624	1.03167	0.060329	0.147361
1780	0.0084184	0.00931622	0.00970838	0.0108658	0.0120028	0.010971	0.0136943	0.70137	0.84917	0.708934	0.774972	0.758611	0.0688305	0.370833
1781	0.000702736	0.00100117	0.00104055	0.00100861	0.00084332	0.000679958	0.000835986	0.833297	1.4724	1.2447	1.11089	1.16532	0.266957	0.00595212
1782	0.00270199	0.00294779	0.00339516	0.00307085	0.0033617	0.00291131	0.00366619	0.803756	1.01253	0.926074	0.763192	0.876388	0.114152	0.30359
1784	0.00533188	0.00517095	0.00561962	0.00616412	0.00490513	0.00484759	0.00536256	1.087	1.06671	1.04794	1.01971	1.05534	0.0286113	0.118932
1785	0.000213714	0.000318824	0.000391316	0.000293827	0.00030899	0.000272112	0.000325511	0.691653	1.17166	1.20216	0.776217	0.960423	0.264089	0.0305632
1790	0.000502303	0.000579285	0.000601325	0.00061458	0.000466525	0.000457254	0.000389182	1.07669	1.26688	1.5451	1.29205	1.29518	0.192362	0.783955
1794	0.000213714	0.000318824	0.000391316	0.000293827	0.00030899	0.000272112	0.000325511	0.691653	1.17166	1.20216	0.776217	0.960423	0.264089	0.0546052
1795	0.000276121	0.000388601	0.000352972	0.000316647	0.000352481	0.000336765	0.000444789	0.783365	1.15393	0.793571	0.629496	0.840089	0.222279	0.783955
1798	0.000335004	0.00073733	0.000518849	0.000465811	0.000482445	0.000566081	0.000724563	0.694388	1.30252	0.716085	0.720225	0.858304	0.296359	0.245792
1801	0.00506822	0.00620814	0.00593494	0.00666491	0.00688173	0.00606911	0.00699769	0.736475	1.02291	0.848128	0.861321	0.867208	0.117943	0.409493
1802	0.00335946	0.00652479	0.00598192	0.00435046	0.0048128	0.00570783	0.00665515	0.698026	1.14313	0.898841	0.651293	0.847823	0.224256	0.109756
1804	0.00026223	0.000274368	0.000181462	0.000286641	0.000377518	0.000476724	0.000499423	0.694616	0.575529	0.363344	0.610696	0.561046	0.140952	0.267806
1805	3.47607e-05	5.13687e-05	3.93477e-05	3.64816e-05	3.92208e-05	4.39897e-05	4.14274e-05	0.886283	1.16774	0.949797	0.819514	0.955834	0.150955	0.00834508
1806	0.000106586	0.00012597	0.000106702	0.000109129	0.000112814	0.000123704	0.000150348	0.944794	1.01832	0.709696	0.806289	0.869774	0.138261	0.59955
1807	4.5399e-05	6.68838e-05	5.12291e-05	7.43055e-05	6.0785e-05	6.33672e-05	7.52089e-05	0.746879	1.0555	0.681158	1.1216	0.901283	0.219558	0.156113
1809	9.588e-05	0.000136662	0.000163794	0.000142057	0.000163613	0.000128847	0.000132762	0.586017	1.06065	1.23374	0.902206	0.945654	0.275345	0.434799
1815	0.00461843	0.00499659	0.00487	0.00576819	0.00506252	0.00536316	0.00522889	0.912279	0.93165	0.931364	0.926497	0.925448	0.00909174	0.719419
1816	0.00432422	0.00500768	0.00476022	0.00474687	0.00447204	0.00501593	0.00499277	0.966946	0.998356	0.953422	0.95119	0.967479	0.0217302	0.000493349
1820	0.000970048	0.000934122	0.00095067	0.00102646	0.00100274	0.00099257	0.00118172	0.967402	0.941115	0.804477	0.789926	0.87573	0.0915027	0.0579828
1822	0.00465387	0.00511155	0.00573411	0.00506659	0.00435416	0.00363012	0.00412578	1.06883	1.40809	1.38982	1.12848	1.24881	0.17524	0.0727823
1823	0.00370185	0.0101027	0.00935062	0.00800715	0.00404973	0.00886774	0.008898	0.914098	1.13926	1.05087	1.0609	1.04128	0.0935458	0.0656674
1825	0.0017873	0.00216625	0.00194879	0.00224251	0.00198738	0.00212666	0.0022603	0.899324	1.01862	0.862183	0.832255	0.903094	0.0817542	0.442446
1827	6.78275e-05	8.69811e-05	7.58407e-05	8.81243e-05	7.20013e-05	7.81529e-05	7.50003e-05	0.942032	1.11296	1.0112	1.15509	1.05532	0.0967085	0.098445
1828	0.00257934	0.0025411	0.00254587	0.00293053	0.00260203	0.00259007	0.00307592	0.99128	0.981095	0.827678	0.917125	0.929295	0.075276	0.335595
1829	0.0177957	0.0217966	0.0220419	0.0313217	0.013818	0.0139759	0.0153286	1.28786	1.55959	1.43796	1.73231	1.50443	0.188231	0.156917
1832	0.000264669	0.000215121	0.000158162	0.000211151	0.000279539	0.000296448	0.000284709	0.946808	0.725662	0.555521	1.0912	0.829799	0.236711	0.0127099
1840	0.000551767	0.000564814	0.000605491	0.000719208	0.000665741	0.000656172	0.000770926	0.828803	0.860772	0.785408	0.841598	0.829145	0.0319811	0.245992
1841	0.000350928	0.000313759	0.000287315	0.000374607	0.000489681	0.000540826	0.000593052	0.716645	0.580148	0.484469	0.686616	0.61697	0.105985	0.00175247
1844	0.00506822	0.00620814	0.00593494	0.00666491	0.00688173	0.00606911	0.00699769	0.736475	1.02291	0.848128	0.861321	0.867208	0.117943	0.00546089
1845	0.00110807	0.00118011	0.000916569	0.00130204	0.00157209	0.00186639	0.00217932	0.704843	0.632296	0.420576	0.619807	0.59438	0.121784	0.109756
1846	0.000341441	0.000384903	0.000306372	0.000341047	0.000388952	0.000522458	0.000556907	0.87785	0.736716	0.550131	0.626826	0.697881	0.142333	0.00689661
1849	0.000121493	0.00013626	0.000138874	0.000145926	0.000125188	0.000161173	0.000124769	0.970485	0.845424	1.11305	1.03628	0.991309	0.113371	0.0239421
1850	7.12155e-05	8.81869e-05	6.85112e-05	5.23534e-05	4.37797e-05	5.29897e-05	6.34618e-05	1.62668	1.66423	1.07957	0.842674	1.30329	0.407053	0.88788
1851	8.31412e-05	7.9103e-05	7.68437e-05	8.14123e-05	6.74424e-05	7.66835e-05	7.51394e-05	1.23277	1.03155	1.02268	1.03558	1.08065	0.101561	0.232959
1852	0.00534184	0.00555634	0.00508711	0.005835	0.00745912	0.00701429	0.00858229	0.716149	0.792145	0.592745	0.627608	0.682162	0.0898572	0.210459
1853	0.000208226	0.000128382	0.000282532	0.000190304	0.000281275	0.000197081	0.000250094	0.740291	0.651414	1.1297	0.661626	0.795758	0.226143	0.00580806
1855	0.0186238	0.0184697	0.017949	0.0214362	0.0196126	0.0181996	0.0210085	0.949586	1.01484	0.854369	0.95045	0.942311	0.0661138	0.168613
1856	0.00413056	0.00392171	0.00346036	0.00320445	0.00285501	0.00239951	0.00258706	1.44678	1.63438	1.33756	1.58336	1.50052	0.134442	0.1793
1858	8.741e-05	2.00973e-05	4.32053e-05	0.000101311	8.0106e-05	3.38877e-05	4.17055e-05	1.09118	0.593056	1.03596	2.191	1.2278	0.679735	0.00501442
1869	8.75456e-05	6.43114e-05	8.69506e-05	8.2123e-05	7.27249e-05	4.70203e-05	5.29659e-05	1.20379	1.36774	1.64163	1.19109	1.35106	0.209752	0.550674
1870	0.000343067	0.000306122	0.00028068	0.000367263	0.000481142	0.000532377	0.000584989	0.713027	0.57501	0.479804	0.683674	0.612879	0.106747	0.0441436
1871	0.00270199	0.00294779	0.00339516	0.00307085	0.0033617	0.00291131	0.00366619	0.803756	1.01253	0.926074	0.763192	0.876388	0.114152	0.00540697
1872	0.000143922	0.000173882	0.000169349	0.000154139	0.000193137	0.000210673	0.000167308	0.745179	0.825363	1.0122	0.865269	0.862002	0.111892	0.118932
1873	3.47607e-05	5.13687e-05	3.93477e-05	3.64816e-05	3.92208e-05	4.39897e-05	4.14274e-05	0.886283	1.16774	0.949797	0.819514	0.955834	0.150955	0.0903346
1874	6.85051e-05	7.74148e-05	7.84638e-05	8.85981e-05	6.84555e-05	6.50203e-05	7.9866e-05	1.00072	1.19063	0.982444	1.15225	1.08151	0.105278	0.59955
1878	5.7799e-05	6.57584e-05	6.28791e-05	6.78304e-05	7.2942e-05	5.62958e-05	3.93422e-05	0.792397	1.16809	1.59826	1.31746	1.21905	0.335716	0.219264
1879	6.66756e-05	8.73831e-05	8.55619e-05	9.34149e-05	7.98889e-05	0.000109837	9.21691e-05	0.834604	0.795574	0.928314	0.950786	0.877319	0.0741726	0.282974
1880	0.00148509	0.00177306	0.00154937	0.0016761	0.00179403	0.00191902	0.00214352	0.827797	0.923944	0.722816	0.6925	0.791764	0.105478	0.045461
1881	0.00295304	0.00460469	0.00427809	0.0042505	0.00307341	0.00384446	0.00533795	0.960835	1.19775	0.801448	0.754971	0.92875	0.199828	0.0289749
1883	0.000779847	0.000870937	0.00109981	0.000875557	0.000582595	0.000535866	0.000538001	1.33857	1.62529	2.04425	1.12868	1.5342	0.396299	0.527244
1885	0.00258564	0.00268331	0.00246995	0.00270832	0.0026042	0.00249162	0.00278349	0.992873	1.07694	0.887357	0.936302	0.973367	0.0814009	0.0740409
1886	0.0142636	0.00445847	0.00511628	0.00464895	0.0166251	0.00669424	0.0074251	0.857951	0.666015	0.689051	1.62569	0.959678	0.45218	0.559564
1887	0.000291909	0.000476628	0.000427346	0.00037516	0.00042043	0.000416938	0.000475373	0.694311	1.14316	0.898971	0.642281	0.844681	0.227753	0.869815
1888	0.0013207	0.00220274	0.00229397	0.0021044	0.00235527	0.00227259	0.00265685	0.560744	0.969267	0.863417	0.736893	0.78258	0.17577	0.26591
1889	0.0158771	0.01745	0.0189607	0.0190329	0.0176047	0.0156111	0.0122096	0.901864	1.11779	1.55293	1.21869	1.19782	0.27113	0.0897528
1898	0.000913604	0.000740063	0.000691593	0.000450018	0.00133915	0.00100983	0.00086233	0.682226	0.732855	0.802005	0.734444	0.737882	0.0491473	0.240604
1902	6.88439e-05	7.71736e-05	8.50218e-05	8.33074e-05	7.91652e-05	7.00713e-05	8.86241e-05	0.869623	1.10136	0.959353	0.975098	0.976358	0.0954085	0.00176124
1903	0.00204865	0.00213988	0.00346537	0.00204399	0.00259747	0.00232833	0.00277209	0.788708	0.919061	1.25009	0.696743	0.913651	0.242131	0.65421
1907	0.000859329	0.000900439	0.000748531	0.00046818	0.00154691	0.00143954	0.000971668	0.555515	0.625506	0.770357	0.589021	0.635099	0.0945933	0.527171
1910	0.00256681	0.00251522	0.00302128	0.00256318	0.00275573	0.00339749	0.0037268	0.931443	0.740315	0.810691	0.786104	0.817138	0.0815924	0.00452664
1911	0.000813523	0.00084891	0.000695605	0.000992188	0.00108899	0.00107715	0.00137461	0.747042	0.788107	0.506037	0.750567	0.697938	0.129277	0.0207082
1913	0.0029342	0.00284385	0.00275842	0.00318092	0.00314099	0.00317176	0.00350938	0.934163	0.896615	0.786016	0.861557	0.869588	0.0631116	0.0185064
1915	9.64898e-05	0.000155151	0.000133319	0.000121526	0.000114623	0.000135	0.000122128	0.841801	1.14927	1.09164	0.918224	1.00023	0.144214	0.0257057
														0.997622

## Sheet: mix-5
Supplementary Table 1. BI measurement of compounds in mix-5 from four individual MS affinity assays
Hits are in bold red with mean BI >2.0 and p <0.05
Cpd ID	BI-1	BI-2	BI-3	BI-4	Mean	s.d.	p-value
1925	1.25543	1.16067	1.41936	0.862735	1.17455	0.233735	0.232133
1926	0.831976	1.05578	1.17682	1.44265	1.12681	0.254446	0.39236
1928	0.880954	0.688835	1.33089	1.17519	1.01897	0.288525	0.712565
1929	1.47548	1.12827	1.05249	0.821741	1.1195	0.270773	0.407025
1934	0.771395	0.870661	0.70623	1.21399	0.89057	0.225967	0.404214
1936	0.707782	0.995988	0.616955	0.90164	0.805591	0.173807	0.111264
1943	0.793803	1.65719	1.39776	1.33323	1.29549	0.362583	0.201606
1948	1.54708	1.30535	1.23944	1.35841	1.36257	0.132286	0.0119403
1950	0.852712	0.832232	1.75333	1.17472	1.15325	0.429702	0.527156
1951	0.953184	1.14847	0.809533	0.916025	0.956804	0.141541	0.584747
1953	1.32594	1.82898	2.05648	0.879851	1.52281	0.526212	0.141082
1959	1.03164	0.993221	1.39555	1.0343	1.11368	0.188852	0.314959
1965	0.586981	1.00111	1.31059	1.13735	1.00901	0.308542	0.957108
1968	0.878312	0.988477	1.09194	1.24335	1.05052	0.155354	0.561817
1974	0.866008	1.02756	0.589375	0.99432	0.869315	0.199202	0.280857
1976	0.661026	0.940588	1.49645	0.891806	0.997469	0.354298	0.989496
1979	1.57351	2.56455	1.24837	0.75464	1.53527	0.764325	0.255838
1981	0.781917	0.692708	0.80069	1.00679	0.820527	0.132811	0.0736176
1983	1.12871	1.43177	2.09244	1.99881	1.66293	0.460477	0.215867
1986	0.831976	1.05578	1.17682	1.44265	1.12681	0.254446	0.39236
1987	1.23715	1.33479	1.58778	1.34642	1.37653	0.149109	0.0149741
1991	0.980687	0.990764	1.44972	1.34842	1.1924	0.242236	0.210378
1995	1.10689	0.919034	1.27832	1.41521	1.17986	0.214816	0.192607
1998	1.68501	1.94665	1.34576	1.31433	1.57294	0.30039	0.0316884
2000	0.661026	0.940588	1.49645	0.891806	0.997469	0.354298	0.989496
2005	1.27481	1.30073	1.18785	0.931731	1.17378	0.168434	0.131057
2006	1.77438	0.99725	1.31808	1.61632	1.42651	0.343058	0.347551
2009	2.29663	1.29584	1.32875	1.76547	1.67167	0.468406	0.31668
2015	1.12388	1.28194	0.840366	0.869453	1.02891	0.211362	0.802163
2017	0.749434	1.15711	1.17081	1.20956	1.07173	0.216008	0.363672
2022	0.776032	0.719293	0.790582	1.14808	0.858496	0.195489	0.243522
2023	0.878312	0.988477	1.09194	1.24335	1.05052	0.155354	0.561817
2024	1.11584	0.888339	1.51189	1.19883	1.17872	0.257996	0.259944
2025	1.0625	1.17357	1.56747	1.00711	1.20266	0.252864	0.207277
2030	0.49927	0.878987	1.41124	1.46708	1.06415	0.460509	0.798661
2031	0.511538	0.95332	0.877053	0.934824	0.819184	0.207653	0.17996
2032	0.959187	1.28844	1.32728	0.899276	1.11854	0.220534	0.361115
2037	0.650978	1.0605	1.03542	0.816162	0.890766	0.193907	0.939901
2040	0.94978	1.34609	1.33519	0.91195	1.13575	0.237128	0.335288
2045	0.916415	1.63807	1.7221	1.33497	1.40289	0.364451	0.42645
2047	0.982364	1.80502	1.56221	1.86102	1.55266	0.401707	0.0706508
2048	0.48797	0.77948	1.19232	1.08949	0.887313	0.318855	0.530632
2049	1.23965	1.01801	1.87839	1.44072	1.39419	0.366063	0.12029
2055	0.989455	0.973767	1.34971	1.21419	1.13178	0.182127	0.243664
2057	0.874999	0.950568	1.5258	1.23373	1.14627	0.296412	0.396425
2067	0.814009	0.645222	1.15725	1.10224	0.929682	0.242118	0.602093
2068	1.00355	1.2635	0.988408	0.88024	1.03393	0.162603	0.704532
2071	0.7104	1.09485	1.1957	1.55073	1.13792	0.345628	0.483156
2075	0.989455	0.973767	1.34971	1.21419	1.13178	0.182127	0.243664
2076	0.939943	1.12844	1.67991	1.03575	1.19601	0.33165	0.322354
2088	0.661358	1.32497	1.89636	1.12751	1.25255	0.511495	0.396201
2091	0.878017	0.892384	1.10912	1.11622	0.998936	0.131493	0.988102
2092	0.860934	1.29989	2.28138	2.13471	1.64423	0.677901	0.153532
2094	0.945227	1.52203	1.82459	1.66478	1.48916	0.383101	0.272261
2095	1.5703	1.59084	1.43083	0.849842	1.36046	0.347752	0.129861
2096	1.62371	1.1514	1.11931	0.839026	1.18336	0.325371	0.341713
2097	0.829502	1.07863	1.65221	0.971371	1.13293	0.360913	0.514727
2099	1.06164	1.02987	1.65333	1.70766	1.36313	0.367367	0.142485
2103	1.80343	1.8451	1.7258	0.881619	1.56399	0.457591	0.0904624
2109	0.890029	1.24858	1.56259	1.8722	1.39335	0.421201	0.158605
2117	1.09052	1.76449	1.86742	1.57068	1.57328	0.344547	0.0447955
2118	1.27495	0.95244	1.32329	0.931857	1.12063	0.207208	0.326477
2119	1.23881	1.56884	1.51333	1.09566	1.35416	0.22476	0.0512087
2120	1.03164	0.993221	1.39555	1.0343	1.11368	0.188852	0.314959
2133	1.13655	1.08926	1.34889	0.830524	1.10131	0.212922	0.411513
2134	0.831976	1.05578	1.17682	1.44265	1.12681	0.254446	0.39236
2138	0.762506	0.795568	0.767492	1.09285	0.854603	0.159495	0.165788
2145	3.07266	1.35143	3.33151	1.40436	2.28999	1.05871	0.0927552
2158	1.65293	0.876202	1.32272	1.79588	1.41193	0.408437	0.137037
2166	0.83296	1.04216	1.33694	1.6853	1.22434	0.370375	0.31245
2169	1.00639	0.885798	0.790404	0.675047	0.839409	0.140771	0.106779
2178	1.81875	1.22538	1.60999	1.1954	1.46238	0.303445	0.324817
2180	1.50352	1.72218	1.93316	1.29236	1.61281	0.276417	0.0213202
2183	1.97491	1.27224	2.25291	1.71136	1.80286	0.417162	0.267058
2188	2.10409	1.65824	1.07261	1.11898	1.48848	0.488968	0.139596
2193	0.840424	0.979575	1.06779	1.2104	1.02455	0.15528	0.772589
2194	1.45152	2.01758	1.37369	1.19745	1.51006	0.354651	0.180948
2196	1.27135	1.12666	2.87754	2.58866	1.96605	0.895481	0.0655698
2201	1.31694	1.17104	1.06387	0.95406	1.12648	0.154823	0.2008
2202	1.09052	1.76449	1.86742	1.57068	1.57328	0.344547	0.0447955
2209	0.92991	1.00302	1.12221	1.55542	1.15264	0.279972	0.355291
2217	0.902993	0.91435	1.33788	1.32767	1.12072	0.244934	0.396936
2221	1.53984	1.07003	1.80113	1.46219	1.4683	0.302514	0.414762
2226	1.09527	1.30137	1.55417	0.864566	1.20384	0.293904	0.25949
2227	1.12106	0.953436	0.883411	1.2422	1.05003	0.162344	0.581302
2237	1.40106	1.65241	1.77874	1.3472	1.54485	0.204951	0.012995
2240	0.863815	1.24952	1.20339	0.943084	1.06495	0.19021	0.543644
2241	1.18828	1.6443	1.66512	1.0912	1.39723	0.30007	0.077155
2244	0.890029	1.24858	1.56259	1.8722	1.39335	0.421201	0.158605
2245	1.40205	1.05031	2.03083	1.37911	1.46558	0.409662	0.10763
2248	1.3076	1.41433	1.18894	0.773345	1.17105	0.280667	0.309978
2257	0.84164	0.781977	1.19921	0.810697	0.90838	0.195409	0.417563
2260	0.923037	1.71112	1.63347	1.69419	1.49046	0.379745	0.342166
2263	1.96727	1.37708	2.17923	1.13781	1.66535	0.488745	0.0723858
2268	0.556766	0.775532	1.13332	1.06219	0.881952	0.266297	0.440603
2269	1.10024	1.03604	1.29937	1.59228	1.25698	0.250068	0.260107
2280	1.18445	1.11622	1.5778	1.66781	1.38657	0.276653	0.0681567
2281	0.824287	1.06226	1.47555	0.989495	1.0879	0.276952	0.481669
2283	1.58959	1.05251	1.42595	0.711505	1.19489	0.3929	0.3943
2286	1.03964	1.05892	1.99876	1.09929	1.29915	0.467066	0.290249
2290	0.929476	1.11136	1.6	1.2562	1.22426	0.28393	0.212302
2291	1.99822	1.55313	2.15485	1.6592	1.84135	0.282338	0.00944938
2292	2.55405	2.39549	2.63306	1.81147	2.34852	0.37141	0.00538876
2296	1.06164	1.02987	1.65333	1.70766	1.36313	0.367367	0.142485
2301	0.770866	0.785803	1.06089	0.968724	0.89657	0.141748	0.240571
2306	0.890029	1.24858	1.56259	1.8722	1.39335	0.421201	0.158605
2309	0.940386	1.32081	1.13653	0.800641	1.04959	0.227316	0.692102
2310	0.692064	0.753514	1.52837	1.34925	1.0808	0.42056	0.726416
2316	1.00142	1.08366	1.70936	1.63022	1.35617	0.36513	0.146146
2319	1.60259	2.05986	2.39721	3.28236	2.3355	0.710278	0.0328785
2320	0.993022	1.03535	1.34705	1.22263	1.14951	0.165218	0.16801
2325	0.804964	1.02349	1.20203	1.16524	1.04893	0.17994	0.624343
2335	0.648576	1.06883	1.53391	0.836181	1.02187	0.382195	0.916097
2337	1.13148	1.13293	1.4661	1.26942	1.24998	0.157937	0.0506518
2343	1.25047	1.12491	1.444	1.45022	1.3174	0.158327	0.027837
2345	1.37034	0.802929	1.03699	1.58742	1.19942	0.348016	0.334906
2351	0.888896	0.87718	0.750588	1.18465	0.925328	0.183872	0.47613
2353	0.905854	0.937988	1.15575	1.24663	1.06156	0.165968	0.512017
2355	0.905854	0.937988	1.15575	1.24663	1.06156	0.165968	0.512017
2358	0.480954	0.688835	1.33089	1.17519	0.918969	0.400063	0.712565
2363	0.951361	0.978526	1.27265	1.29999	1.12563	0.186212	0.270028
2364	1.25371	1.14686	1.31513	0.940617	1.16408	0.164399	0.727339
2367	0.92487	0.789406	0.889417	1.09459	0.924571	0.127034	0.820934
2369	1.25711	1.58497	2.00083	2.7482	1.89778	0.643465	0.068393
2370	1.30655	0.532252	1.95974	1.53285	1.33285	0.59851	0.347136
2374	1.55037	1.12065	1.83673	1.48059	1.49708	0.294491	0.140539
2377	0.85664	1.10419	1.02194	1.23577	1.05463	0.158679	0.540536
2381	0.896073	1.23281	1.52404	0.85626	1.1273	0.313827	0.476611
2384	0.802408	0.676659	0.641628	0.983505	0.77605	0.154575	0.062623
2390	0.600172	0.702146	1.12458	1.02266	0.862389	0.250909	0.352841
2394	0.866008	1.02756	0.589375	0.99432	0.869315	0.199202	0.280857
2395	0.243163	0.333188	0.459236	0.525841	0.390357	0.126537	0.00237254
2398	1.26228	0.968899	0.969926	1.04311	1.06105	0.138576	0.443111

## Sheet: mix-6
Supplementary Table 1. BI measurement of compounds in mix-6 from four individual MS affinity assays
Hits are in bold red with mean BI >2.0 and p <0.05
Cpd ID	BI-1	BI-2	BI-3	BI-4	Mean	s.d.	p-value
2401	1.0372	1.35001	1.07726	1.2709	1.18384	0.150611	0.0923935
2403	0.691378	0.646417	1.07224	0.581829	0.747966	0.220808	0.106656
2405	0.957821	0.828523	1.69707	1.72182	1.30131	0.47433	0.2935
2406	1.48432	3.23816	3.36593	1.04072	2.28228	1.1925	0.120643
2407	0.696906	0.858931	0.767781	0.757454	0.770268	0.0668665	0.00631223
2411	1.17952	1.0883	1.06494	1.32897	1.16543	0.119707	0.0699216
2414	0.980836	1.0496	1.00455	1.10611	1.03527	0.0551665	0.290921
2416	1.04039	1.08693	0.729766	0.576543	0.858409	0.245858	0.332862
2419	0.771583	1.47071	1.50191	0.783425	1.13191	0.409455	0.565254
2422	0.929005	0.966961	1.43977	0.900296	1.05901	0.255306	0.675361
2423	0.854463	0.979782	0.749066	0.944474	0.881946	0.103109	0.105967
2425	1.09007	1.07608	0.939462	0.834701	0.985078	0.121104	0.821252
2427	1.09288	1.03633	1.15241	1.23551	1.12928	0.0852155	0.0561203
2431	0.83682	0.980349	0.768358	0.694965	0.820123	0.121512	0.0595124
2433	0.78411	0.882958	0.867196	0.868433	0.850674	0.0449495	0.00694739
2434	1.05652	0.762121	0.651876	1.02353	0.87351	0.197928	0.291122
2438	1.35371	1.07937	1.03088	0.976237	1.11005	0.167816	0.281006
2441	0.509592	0.640215	0.833703	0.715973	0.67487	0.135935	0.0173691
2443	0.856844	0.903731	0.69796	0.562574	0.755277	0.15575	0.0515635
2444	0.852143	1.05085	0.739747	0.690446	0.833296	0.160044	0.128605
2445	0.744075	0.878493	0.85376	0.853284	0.832403	0.0600507	0.0113527
2447	1.16497	1.20859	1.34165	0.668689	1.09597	0.294601	0.561157
2449	0.736262	0.664114	0.699996	0.57079	0.66779	0.0710589	0.0025906
2450	1.011	1.0622	0.905652	0.986458	0.99133	0.0652554	0.807662
2451	1.13858	0.773044	0.953793	0.708986	0.893601	0.193438	0.351653
2453	1.17505	1.23482	0.718031	0.720352	0.962064	0.281505	0.805001
2455	0.991237	1.03874	0.762668	0.513533	0.826545	0.240976	0.245591
2456	1.19273	2.91143	2.59117	1.77615	2.11787	0.780258	0.0642931
2461	0.861232	1.17943	0.630343	0.699718	0.84268	0.244451	0.288366
2462	0.899501	1.15585	0.737725	0.63249	0.856392	0.22785	0.296595
2463	1.20093	1.1518	1.44163	1.38583	1.29505	0.140363	0.0245686
2464	0.932316	0.962266	1.21974	1.21099	1.08133	0.155296	0.371865
2465	1.00258	1.39838	0.691363	0.903281	0.998902	0.296268	0.994551
2467	0.991538	0.980794	1.63064	0.565292	1.04207	0.439712	0.860481
2468	0.863467	1.22434	0.8604	0.594762	0.885742	0.258492	0.44178
2470	0.850451	1.26734	0.70113	0.849608	0.917132	0.243795	0.545377
2471	0.869423	1.10397	0.689174	0.685804	0.837093	0.197517	0.197597
2473	0.788749	1.09787	0.884707	0.560001	0.832832	0.223098	0.23092
2476	0.572735	0.647297	0.694831	0.265045	0.544977	0.193268	0.0181296
2477	0.736047	1.0093	0.720613	0.69252	0.789621	0.147559	0.0650307
2478	0.872793	0.969863	0.890201	0.799531	0.883097	0.0699241	0.0442651
2480	0.812726	1.0067	0.932726	1.04059	0.948184	0.100913	0.380011
2481	0.604278	0.847492	0.897983	0.791508	0.785315	0.128287	0.044159
2482	0.789373	1.07125	0.855923	0.641822	0.839592	0.178481	0.170108
2483	0.76833	0.921793	0.948134	0.63086	0.817279	0.147416	0.08935
2488	0.791804	1.01743	1.13092	1.32962	1.06744	0.224532	0.590357
2490	0.731242	0.759328	1.03562	1.02652	0.888177	0.165438	0.269317
2493	1.12325	1.21269	0.959262	1.10089	1.09902	0.104948	0.155607
2494	0.76592	0.724925	0.909605	0.87115	0.8179	0.0867789	0.0246806
2496	0.680261	0.845473	0.899161	0.691444	0.779085	0.109959	0.0276783
2498	1.05652	0.762121	0.651876	1.02353	0.87351	0.197928	0.291122
2501	0.843098	1.01522	0.650643	0.533774	0.760684	0.212271	0.10945
2502	1.10408	1.10745	0.748696	0.725015	0.92131	0.213213	0.51393
2503	0.8251	1.63012	0.87774	0.679377	1.00308	0.426362	0.989363
2504	0.887018	0.958021	0.82619	0.885556	0.889196	0.0539279	0.0260938
2505	0.730271	0.756929	0.85731	0.500591	0.711275	0.150731	0.0313391
2508	0.825916	1.04979	0.999549	0.582381	0.86441	0.211071	0.289084
2509	0.991538	0.980794	1.63064	0.565292	1.04207	0.439712	0.860481
2510	0.508637	0.640215	0.832938	1.04264	0.756108	0.232865	0.127205
2513	1.09568	1.14538	0.890677	0.543518	0.918816	0.273408	0.594403
2514	1.21291	0.415811	0.932854	0.925403	0.871745	0.332107	0.496163
2520	0.865315	0.831933	0.991272	1.07892	0.94186	0.114266	0.383777
2522	0.941259	0.979134	0.790459	0.606911	0.829441	0.169263	0.137277
2525	1.07062	1.1632	0.896351	0.802777	0.983238	0.16344	0.850613
2530	0.773915	0.766609	0.878188	0.752796	0.792877	0.0575441	0.00552489
2531	2.05699	2.25134	1.73902	0.80324	1.71265	0.641996	0.113033
2533	1.0002	1.12779	1.01979	0.567295	0.928769	0.247427	0.605122
2536	0.840713	0.834305	0.997641	1.12951	0.950543	0.141212	0.534074
2537	1.45175	1.04762	1.28194	0.931661	1.17824	0.233401	0.22412
2538	1.51378	0.737246	1.65696	1.57351	1.37038	0.426151	0.180558
2543	1.13821	0.906803	0.941437	0.548249	0.883674	0.245743	0.413622
2545	1.05328	1.1011	0.815317	0.618985	0.897168	0.223638	0.425588
2546	0.720081	0.959389	1.30057	0.867893	0.961984	0.24632	0.777766
2548	0.619669	0.540119	1.37614	1.30555	0.960371	0.441477	0.868963
2549	0.731381	0.933567	1.25384	0.671514	0.897576	0.262645	0.492303
2550	1.11459	1.09419	1.0149	0.659004	0.970671	0.212181	0.800155
2551	1.29447	1.01297	1.32031	0.979041	1.1517	0.18062	0.191599
2552	1.01101	0.829888	0.713175	0.635885	0.797489	0.163161	0.089085
2553	0.69185	1.52672	1.99524	1.61495	1.45719	0.549231	0.194534
2556	0.66725	0.889122	0.948013	0.894641	0.849756	0.124535	0.0947729
2558	0.700755	0.873242	0.905587	1.12653	0.901528	0.174882	0.342055
2561	0.78808	0.918386	1.05715	1.12896	0.973145	0.151199	0.745927
2566	1.00731	0.94671	1.13938	1.05152	1.03623	0.0810846	0.43734
2576	0.772049	1.20809	1.04117	1.00152	1.00571	0.179657	0.953333
2577	0.939124	1.06891	0.939424	0.634579	0.895509	0.184375	0.339407
2578	0.776259	1.01965	0.745772	0.732392	0.818519	0.135339	0.0749293
2579	0.89779	1.38271	1.05998	0.644445	0.996232	0.309233	0.982089
2580	1.0445	1.13313	0.848336	0.562283	0.897063	0.252928	0.475271
2581	0.752743	1.03182	0.976389	1.11657	0.969381	0.155505	0.720048
2582	0.552895	1.2265	0.584059	1.01311	0.844141	0.330261	0.414877
2583	0.699292	1.05894	0.710348	0.742848	0.802857	0.171721	0.105366
2584	0.616547	0.856279	0.999672	0.789672	0.815543	0.158988	0.103047
2586	0.845405	1.03323	0.754712	0.520688	0.788509	0.212913	0.141143
2587	1.05396	1.05794	0.848067	0.676179	0.909035	0.183588	0.394756
2588	0.921978	0.54619	0.835374	0.532804	0.709086	0.199066	0.0613578
2589	0.675472	0.819229	0.947458	0.950583	0.848186	0.130395	0.102285
2590	0.666579	0.578044	0.816049	0.863922	0.731149	0.132221	0.0268197
2592	0.939124	1.06891	0.939424	0.634579	0.895509	0.184375	0.339407
2593	0.392404	0.392759	0.342707	0.409677	0.384387	0.0289319	2.85578e-05
2597	0.976914	1.06652	0.759965	0.740379	0.885945	0.161188	0.251959
2602	0.867553	1.61301	0.744738	0.761382	0.99667	0.414477	0.988189
2604	0.647042	1.18929	1.01192	0.68992	0.884544	0.260372	0.440479
2605	0.947156	1.09062	1.08613	0.619553	0.935865	0.22114	0.602579
2607	0.857526	1.30046	0.726767	0.970073	0.963708	0.245534	0.786801
2608	0.90072	1.08276	0.882482	0.666585	0.883137	0.170346	0.26364
2609	1.05066	0.971734	0.978087	0.448579	0.862265	0.278105	0.394939
2610	1.08455	0.922758	1.08677	0.966182	1.01506	0.0834252	0.74193
2614	1.16919	1.34738	0.537412	0.480413	0.883599	0.439341	0.632902
2619	0.498758	0.719908	0.524335	0.667283	0.602571	0.107786	0.00515542
2621	1.13821	0.906803	0.941437	0.548249	0.883674	0.245743	0.413622
2623	0.473713	0.910804	0.767741	0.847257	0.749879	0.193189	0.0811167
2626	0.965055	0.997767	1.2293	1.55506	1.18679	0.272229	0.263565
2631	1.10585	0.830962	1.42764	0.841657	1.05153	0.281133	0.73827
2632	0.65601	0.823906	1.03441	0.983212	0.874384	0.170964	0.238033
2633	0.80437	1.19125	0.72915	0.63662	0.840347	0.243785	0.28154
2635	1.1807	1.1012	1.16706	0.574791	1.00594	0.28952	0.96985
2636	0.857716	1.05439	0.763244	0.78958	0.866232	0.131601	0.134962
2639	0.877253	0.751067	1.34582	1.02152	0.998915	0.256311	0.993778
2640	1.09824	1.20711	0.935668	0.903141	1.03604	0.142444	0.64768
2642	1.13019	0.594239	0.73528	0.937675	0.849346	0.234355	0.288806
2644	0.786407	0.929425	0.759721	0.887419	0.840743	0.0807468	0.0290477
2647	0.606332	0.817503	1.16679	0.936699	0.881831	0.233988	0.38687
2651	0.570672	0.790679	0.548887	0.65627	0.641627	0.109645	0.00727639
2652	0.729249	1.03078	1.0024	0.496139	0.814644	0.25213	0.23783
2654	0.668779	0.580155	1.07615	0.812851	0.784483	0.216802	0.140938
2655	0.81603	1.04477	0.715271	0.77319	0.837316	0.144336	0.109508
2656	0.933348	1.11658	0.872248	0.684735	0.901728	0.178061	0.350269
2657	0.763462	0.821099	0.8415	0.985269	0.852832	0.0942723	0.0523826
2658	0.979411	1.20542	0.817531	1.04345	1.01145	0.160497	0.895565
2662	2.02126	1.40897	1.61794	1.39386	1.6105	0.292304	0.0249895
2666	0.586263	0.584343	0.32036	0.696001	0.546742	0.15969	0.0108311
2668	1.27374	1.06033	1.09171	0.551404	0.994294	0.309888	0.972939
2669	0.946347	1.02388	1.08164	0.663316	0.928795	0.185463	0.498472
2670	1.29306	1.39919	0.794531	0.780989	1.06694	0.325318	0.708302
2671	1.33028	1.64979	1.64435	1.80115	1.60639	0.1979	0.00873599
2672	1.10946	1.02656	1.1957	1.19916	1.13272	0.0820424	0.0480188
2673	1.45675	1.06989	0.684045	0.756628	0.991828	0.352275	0.965911
2676	0.789237	1.34829	0.705035	0.710008	0.888143	0.309182	0.521648
2680	1.24965	1.05625	0.94937	0.969412	1.05617	0.137072	0.472512
2681	0.698319	1.03852	0.677845	0.688546	0.775809	0.175343	0.0834195
2683	1.39282	1.14504	1.02181	1.11667	1.16908	0.158191	0.122115
2686	0.643887	0.954197	1.25481	0.657296	0.877547	0.28943	0.459614
2687	1.00375	0.706398	0.789457	0.944753	0.86109	0.137129	0.135871
2692	0.967968	1.13192	1.02959	0.737275	0.966688	0.167223	0.716988
2694	0.952911	1.45783	0.765178	0.8656	1.01038	0.308006	0.950501
2695	0.895182	1.08332	1.18648	1.18157	1.08664	0.136196	0.292942
2696	0.520936	0.925819	1.07515	0.820002	0.835476	0.234363	0.254932
2701	0.526024	0.310527	1.08594	0.796564	0.679764	0.335953	0.152661
2702	1.04039	1.08693	0.729766	0.576543	0.858409	0.245858	0.332862
2707	1.011	1.0622	0.905652	0.986458	0.99133	0.0652554	0.807662
2709	0.971492	1.26763	1.1177	1.15222	1.12726	0.122041	0.128325
2710	1.68287	0.893341	0.849547	0.91591	1.08542	0.399252	0.697595
2714	0.498758	0.719908	0.524335	0.667283	0.602571	0.107786	0.00515542
2715	0.81603	1.04477	0.715271	0.77319	0.837316	0.144336	0.109508
2716	0.702087	0.762858	1.0979	0.674146	0.809247	0.195965	0.146731
2718	1.72652	1.82187	1.86105	1.9565	1.84148	0.0952396	0.000395106
2719	0.991538	0.980794	1.63064	0.565292	1.04207	0.439712	0.860481
2722	1.0285	0.865635	0.933505	0.949591	0.944308	0.0668901	0.194468
2725	1.00285	1.06589	1.12535	0.515416	0.927377	0.279158	0.638813
2728	0.872182	1.0205	0.927071	0.876884	0.924159	0.0688624	0.114883
2732	0.900072	0.826122	0.885517	1.07394	0.921412	0.106597	0.236797
2733	0.858144	1.23585	0.811626	0.618442	0.881016	0.258323	0.424884
2734	0.825383	0.887304	0.778576	0.869165	0.840107	0.0485621	0.00712619
2739	0.609975	0.934179	0.665754	0.708449	0.729589	0.142228	0.0319504
2740	1.49647	0.735242	0.780259	0.745641	0.939402	0.371875	0.765907
2743	1.09199	1.33143	0.848457	0.536942	0.952206	0.339883	0.79681
2749	0.668225	0.538094	0.792923	0.399596	0.59971	0.169182	0.0178879
2751	0.688093	0.882707	1.05405	0.952564	0.894354	0.154457	0.26478
2753	0.452446	0.853516	0.480502	0.852096	0.65964	0.223343	0.0555215
2757	0.763161	0.895899	1.1034	0.893001	0.913864	0.140702	0.308192
2759	0.848918	0.947348	1.0239	1.07611	0.974068	0.0987787	0.635883
2763	0.971033	0.748605	0.942832	0.877257	0.884932	0.099011	0.102675
2764	1.9986	0.832678	2.02443	2.49414	1.83746	0.707517	0.0987423
2765	0.757647	0.890487	0.912809	0.977908	0.884713	0.0924732	0.0882172
2766	1.19373	1.45433	1.4859	1.33177	1.36643	0.132948	0.0117558
2768	0.802353	1.32707	0.835879	0.702471	0.916944	0.279228	0.593795
2769	1.07475	0.80011	1.29945	1.22828	1.10065	0.221214	0.429928
2770	0.797548	0.756957	0.962005	1.05896	0.893867	0.141327	0.230118
2771	1.21643	1.06117	1.13856	1.28211	1.17457	0.0956967	0.0355333
2772	0.711849	0.959379	2.30364	0.992603	1.24187	0.718845	0.549187
2775	0.86542	1.0266	0.695666	0.792986	0.845167	0.139524	0.113101
2776	0.94616	1.11594	0.908912	0.770134	0.935285	0.142271	0.430035
2777	1.45668	1.02943	1.06091	1.14032	1.17184	0.195546	0.177081
2778	0.772106	1.26443	0.713002	0.675336	0.85622	0.275042	0.372606
2779	0.855745	0.8021	0.748107	0.72446	0.782603	0.0585957	0.00506439
2783	0.948487	0.903936	1.00452	1.41053	1.06687	0.232775	0.605863
2784	0.96517	0.943113	0.843287	0.753764	0.876333	0.097411	0.0847486
2786	0.832291	1.01607	0.911627	0.38011	0.785024	0.280238	0.222525
2788	0.678733	0.715857	0.481983	0.692056	0.642157	0.107881	0.00697771
2790	0.974784	1.17325	0.842908	1.00465	0.998897	0.135824	0.988062
2792	0.832394	0.872772	0.939302	1.12426	0.942181	0.129139	0.436524
2793	0.786244	0.852529	0.675678	0.509991	0.706111	0.149721	0.0294112
2794	0.73338	1.04644	0.982288	0.748115	0.877555	0.160241	0.223907
2795	0.962564	1.17364	0.74416	0.643953	0.881079	0.236084	0.387936
2798	0.634494	1.13224	0.941575	1.02741	0.933929	0.214309	0.581134
2800	0.843238	0.978172	0.958014	0.883209	0.915658	0.0632445	0.0758736
2802	0.498758	0.719908	0.524335	0.667283	0.602571	0.107786	0.00515542
2806	0.68534	1.11958	0.57111	0.353351	0.682345	0.322383	0.143353
2809	0.952518	0.621381	0.969515	0.997084	0.885125	0.176786	0.284588
2811	3.78545	3.91345	4.81395	4.7181	4.30774	0.5332	0.00112822
2812	0.993783	0.933728	1.24474	1.347	1.12981	0.197764	0.280643
2813	0.8206	0.779698	0.935371	0.803907	0.834894	0.0690571	0.0173876
2814	1.30189	1.23986	0.800454	0.634985	0.994298	0.327412	0.974401
2815	1.39047	1.67884	2.004	1.37654	1.61246	0.295885	0.0255894
2816	0.727658	0.968267	0.792499	0.684115	0.793135	0.124959	0.0453604
2817	0.674485	0.694187	0.867845	0.783737	0.755063	0.0889582	0.0117891
2819	0.552025	0.920747	0.974659	0.559971	0.751851	0.227243	0.11691
2824	0.70986	1.01639	0.809369	0.623351	0.789743	0.169138	0.088781
2825	1.1848	0.89066	0.728558	0.941056	0.936268	0.188868	0.548103
2827	0.877177	0.808726	0.857061	0.939135	0.870525	0.0540123	0.017264
2830	1.0126	1.02315	0.945904	0.850413	0.958016	0.0794709	0.368261
2834	0.630823	1.3398	0.848845	0.650208	0.867418	0.329972	0.480408
2836	0.773317	0.927056	1.01389	0.982223	0.924122	0.106748	0.250263
2840	1.06322	1.63454	1.42676	0.969058	1.27339	0.31131	0.177275
2844	0.840796	0.839037	0.965296	1.22753	0.968164	0.182733	0.750525
2845	0.710062	0.744341	1.08253	0.70034	0.809319	0.183118	0.128682
2849	0.834595	1.12183	0.896563	0.630627	0.870903	0.202214	0.291525
2850	0.793392	0.908011	0.815101	0.718008	0.808628	0.0782368	0.016339
2851	0.647806	0.775063	0.993294	1.0191	0.858816	0.178246	0.211329
2854	1.20975	0.782114	1.34578	1.12216	1.11495	0.240209	0.409128
2856	0.375486	0.804709	0.825696	0.769168	0.693765	0.213465	0.0640928
2859	0.671329	0.866495	1.21643	1.25811	1.00309	0.282412	0.983919
2861	1.11452	1.49661	0.578457	0.779463	0.992262	0.402422	0.97174
2862	1.19481	1.08156	1.45293	0.983521	1.17821	0.202478	0.176592
2863	0.99753	1.33812	1.02558	1.08905	1.11257	0.155162	0.242681
2864	1.27144	1.10547	0.923598	0.967921	1.06711	0.156693	0.454658
2865	1.0741	1.03047	0.73942	0.745234	0.897306	0.179854	0.336359
2866	1.11452	1.49661	0.578457	0.779463	0.992262	0.402422	0.97174
2868	1.1138	1.05987	1.00261	1.03079	1.05177	0.0475037	0.117398
2869	0.730823	0.891281	0.843967	0.967294	0.858341	0.0990341	0.0645343
2872	0.842262	1.27407	0.83941	0.680931	0.909167	0.254679	0.527135
2873	0.889599	0.609251	1.076	0.950551	0.88135	0.197301	0.315348
2874	1.03127	1.08221	1.08526	1.11775	1.07912	0.0357258	0.0213784
2875	0.660606	0.881446	0.767344	0.585993	0.723847	0.128754	0.0232895

## Sheet: mix-7
Supplementary Table 1. BI measurement of compounds in mix-7 from four individual MS affinity assays
Hits are in bold red with mean BI >2.0 and p <0.05
Cpd ID	BI-1	BI-2	BI-3	BI-4	Mean	s.d.	p-value
2891	0.514604	0.744142	0.68137	0.4621	0.600554	0.133798	0.00940052
2893	0.74684	0.816199	0.838238	1.35668	0.939488	0.280839	0.695602
2894	0.953073	1.09504	0.893629	1.04823	0.997491	0.0910121	0.959501
2895	0.968335	0.838683	0.798898	0.953136	0.889763	0.0837761	0.0782105
2897	1.05584	0.650036	1.06666	0.821212	0.898436	0.200616	0.385857
2898	1.04249	0.86771	1.03798	0.94725	0.973858	0.0832618	0.574587
2899	0.595516	0.951542	0.923681	0.86419	0.833732	0.162936	0.133931
2901	1.22203	1.11121	0.973882	1.18846	1.12389	0.110248	0.110188
2903	1.10627	0.950617	0.976754	0.809236	0.960719	0.121779	0.564786
2905	1.20881	0.537437	1.32346	0.993283	1.01575	0.347008	0.933405
2907	0.860006	0.683315	0.800382	0.405139	0.68721	0.201863	0.0533359
2911	2.35727	5.04814	2.54843	3.77935	3.4333	1.24744	0.0298957
2912	2.22054	0.868184	0.859563	2.65689	1.65129	0.926529	0.254431
2913	0.963163	0.657623	0.768593	0.888537	0.819479	0.134413	0.0746638
2916	1.08063	0.525651	1.06965	0.803564	0.869872	0.262813	0.395044
2918	0.819259	0.630372	0.730556	0.490999	0.667797	0.140875	0.0180509
2919	0.892314	0.628079	0.788799	0.456582	0.691444	0.190615	0.0479424
2920	0.724293	0.840644	0.609991	0.814437	0.747341	0.104249	0.0167553
2921	0.90785	0.778944	0.810737	0.604894	0.775606	0.126328	0.0380215
2922	0.913525	1.06473	0.82102	1.09044	0.972427	0.127592	0.694777
2923	1.12807	1.02071	0.992109	1.171	1.07797	0.0852733	0.164876
2926	0.915385	0.725342	0.754181	0.440556	0.708866	0.197455	0.0600793
2927	0.807555	0.769569	0.723998	0.973976	0.818774	0.10896	0.0448378
2929	1.09236	0.603924	1.29842	0.490428	0.871282	0.386371	0.552882
2930	1.09706	1.25407	1.27156	0.970019	1.14818	0.14235	0.12877
2931	0.813891	0.176759	0.988231	0.548872	0.631938	0.353148	0.128454
2932	0.863224	0.661642	0.927834	0.491338	0.736009	0.198641	0.0764713
2934	0.78912	0.564628	0.961804	0.304527	0.65502	0.284672	0.0938576
2938	1.04248	0.814205	1.04679	0.387038	0.822628	0.31005	0.335579
2939	0.945508	1.07292	1.02773	1.30961	1.08894	0.156279	0.337702
2940	1.07202	0.978235	0.628476	0.738211	0.854235	0.20594	0.251846
2941	1.38101	0.578479	1.00676	0.759371	0.931406	0.347361	0.719288
2943	0.854497	1.32183	0.901079	0.879988	0.989349	0.222471	0.929754
2944	0.932166	0.824545	0.825424	0.894219	0.869089	0.0532322	0.0161006
2945	1.29372	0.696054	1.44957	0.315253	0.93865	0.527445	0.831016
2946	0.867747	0.885783	1.09835	0.964411	0.954072	0.104941	0.445834
2947	0.990654	1.19426	0.929477	1.00809	1.03062	0.114182	0.628949
2948	0.90123	0.791136	0.812852	0.695191	0.800102	0.0846093	0.0179585
2950	1.38885	1.1549	1.3144	1.28643	1.28615	0.0975905	0.00988867
2951	1.02912	1.04747	0.98475	1.1841	1.06136	0.0859583	0.248689
2953	0.892535	1.00863	0.507477	0.897585	0.826557	0.219363	0.211942
2959	0.827167	0.723062	0.722691	0.733237	0.751539	0.0506549	0.00225144
2961	0.974723	0.746929	0.790368	0.583568	0.773897	0.160784	0.0671535
2963	0.866078	1.80441	1.00283	0.737444	1.10269	0.4802	0.69771
2964	0.930072	0.592276	0.6994	0.690106	0.727963	0.143188	0.0320106
2966	1.32261	0.789825	1.27362	1.19049	1.14414	0.242422	0.319927
2971	0.78885	0.541752	0.676576	0.262933	0.567528	0.226802	0.0317093
2972	0.713503	0.365995	0.991201	0.579986	0.662671	0.261642	0.0818827
2973	0.902715	0.384408	1.16726	0.578359	0.758186	0.346545	0.257201
2977	0.866443	0.655222	0.606836	0.412518	0.635255	0.186428	0.0296633
2978	0.630247	0.895888	0.762875	1.18504	0.868512	0.237254	0.348556
2980	2.9607	5.11392	5.03193	2.46697	3.89338	1.37726	0.0246065
2981	0.894226	0.688569	0.814233	0.61538	0.753102	0.12488	0.0288651
2982	1.06805	0.733739	0.649362	0.52095	0.743025	0.233679	0.115239
2984	0.919669	0.700025	0.836361	0.623546	0.7699	0.133104	0.0407154
2985	1.54174	0.693058	1.12367	0.838705	1.04929	0.373849	0.809078
2986	0.843749	0.806304	0.912745	0.726268	0.822266	0.0777138	0.0196094
2987	1.01643	0.723989	0.775802	0.541907	0.764531	0.195605	0.0952224
2991	0.859745	0.992279	0.860324	0.620275	0.833156	0.155009	0.120401
2992	1.03012	1.05031	0.933504	1.00311	1.00426	0.050981	0.877869
2994	1.10583	0.99408	0.943923	0.975246	1.00477	0.0704772	0.900907
2999	1.07649	0.513146	0.877167	0.596267	0.765767	0.259168	0.168398
3000	0.895568	1.17817	1.0889	0.955944	1.02964	0.127774	0.674236
3001	0.95423	0.941909	0.82474	0.985998	0.926719	0.0704775	0.129058
3002	0.881094	0.865549	0.81862	0.703335	0.81715	0.0803891	0.0199003
3003	1.27607	0.865518	1.03099	1.32261	1.1238	0.214504	0.331996
3004	1.35626	0.959869	0.833211	0.883727	1.00827	0.237765	0.948937
3005	0.924674	0.969371	0.868685	0.957424	0.930038	0.0450558	0.0530651
3008	1.17766	0.77489	1.00561	0.754995	0.928291	0.201436	0.527852
3010	0.975136	1.13712	0.923388	0.970186	1.00146	0.0933998	0.977056
3011	0.88959	2.85393	1.91807	2.77273	2.10858	0.916311	0.0941973
3012	1.30003	0.503998	0.84631	0.452465	0.775702	0.390817	0.334266
3013	1.05409	0.824723	0.937252	1.07935	0.973853	0.117113	0.685485
3014	0.799327	0.672233	0.872462	0.577979	0.7305	0.131083	0.0260507
3015	1.68651	2.07991	1.24188	1.55066	1.63974	0.347447	0.0346962
3016	1.04021	1.15537	0.905207	1.09586	1.04916	0.106873	0.425409
3018	0.341696	0.526251	0.421333	0.4767	0.441495	0.0791399	0.000770357
3022	1.43897	0.797533	1.11559	0.708913	1.01525	0.332088	0.932611
3023	0.860794	0.933333	0.861073	0.785578	0.860194	0.0603268	0.0189216
3024	0.859016	0.804783	0.757227	0.631489	0.763129	0.0971136	0.0164663
3025	0.880839	0.528835	0.867265	0.783902	0.76521	0.163307	0.0637663
3026	1.00254	1.16808	1.49201	1.18667	1.21232	0.204	0.128806
3027	1.0317	1.05679	0.897121	1.06286	1.01212	0.0778436	0.775884
3028	1.06868	0.643351	0.688562	0.458473	0.714767	0.25608	0.112238
3029	0.873942	0.59178	0.867767	0.596158	0.732412	0.15989	0.0441518
3031	0.74909	0.770113	0.772615	1.21102	0.875711	0.223791	0.347688
3032	1.02562	1.02871	0.929543	1.12554	1.02735	0.0800256	0.543316
3035	0.975136	1.13712	0.923388	0.970186	1.00146	0.0933998	0.977056
3038	0.840956	1.15192	0.897512	0.766755	0.914285	0.167225	0.380736
3039	0.890552	1.04655	1.16736	0.916873	1.00533	0.127737	0.938704
3041	1.4122	1.35519	1.70026	0.463628	1.23282	0.534574	0.447829
3042	1.03771	1.10676	1.00387	1.07794	1.05657	0.0451217	0.0871392
3043	1.00157	0.907918	0.919301	0.915635	0.936105	0.0438973	0.061941
3046	1.05809	1.06688	1.05496	1.08758	1.06688	0.0146971	0.00280333
3047	0.999994	0.886573	0.759862	0.703865	0.837574	0.132538	0.0915958
3049	1.16977	0.575835	1.23611	0.461547	0.860814	0.398717	0.535322
3050	0.865124	0.889472	0.774772	0.848843	0.844553	0.0494254	0.0081155
3052	1.74013	1.62185	1.16606	1.17644	1.42612	0.298264	0.0647179
3054	1.25621	0.775192	1.01405	1.34942	1.09872	0.257871	0.499615
3055	1.28186	0.510166	1.28252	0.439485	0.878507	0.467023	0.63882
3056	1.2168	1.12218	0.972457	1.19663	1.12702	0.110783	0.105659
3057	0.820949	0.671544	0.848479	0.544281	0.721313	0.141322	0.0290594
3059	0.841358	1.01647	0.921865	0.955338	0.933758	0.0729985	0.167173
3060	1.22318	1.19468	1.17049	0.831781	1.10503	0.183436	0.335218
3061	1.19248	0.492371	1.19389	0.578638	0.864343	0.381341	0.528124
3062	0.849584	0.567023	0.854121	0.738718	0.752362	0.134591	0.0347602
3066	0.881094	0.865549	0.81862	0.703335	0.81715	0.0803891	0.0199003
3068	1.03833	1.02871	0.972578	1.09714	1.03419	0.0510097	0.272532
3071	0.901876	0.884279	0.811434	0.732858	0.832612	0.0771715	0.0226029
3072	0.965759	0.980969	1.04711	1.12387	1.02943	0.0721882	0.474626
3073	1.02977	1.0465	0.903012	1.10007	1.01984	0.0834567	0.666953
3074	0.975606	0.906272	0.992708	0.93548	0.952516	0.0390609	0.0932246
3075	0.846041	0.717639	0.773514	0.646009	0.7458	0.0847893	0.00928999
3076	0.850132	0.897151	0.757304	0.808591	0.828295	0.0595706	0.0103746
3095	0.980683	0.682527	0.935541	0.640193	0.809736	0.173183	0.115467
3096	0.866486	0.465331	1.05373	0.234096	0.654911	0.372759	0.161178
3099	1.06174	1.0833	1.18654	0.984463	1.07901	0.0833025	0.154092
3102	0.817229	0.309006	0.699048	0.202346	0.506907	0.297288	0.0451458
3103	0.908654	0.625093	1.18147	1.01726	0.933119	0.233978	0.607561
3104	0.961215	0.805345	0.828174	1.20705	0.950446	0.184361	0.628186
3106	0.851784	0.492568	0.898381	0.199403	0.610534	0.328635	0.0984856
3108	1.88647	1.3662	1.26489	1.48336	1.50023	0.272527	0.0349748
3112	1.15535	1.26749	0.734903	1.06229	1.05501	0.229302	0.664175
3113	1.0867	1.66302	1.13	1.45114	1.33272	0.273704	0.0932294
3120	0.787831	0.746311	0.833441	0.857162	0.806186	0.0492046	0.00426196
3121	0.95412	0.694655	0.873267	0.456476	0.744629	0.220578	0.103512
3123	1.00549	0.886228	0.889129	0.712167	0.873254	0.120908	0.126981
3127	0.809226	0.841464	0.692765	0.847249	0.797676	0.0719135	0.0111012
3129	1.03379	1.1803	1.06831	0.92824	1.05266	0.103879	0.385307
3130	1.16989	0.949757	0.934037	0.717069	0.942687	0.184976	0.57935
3134	0.884384	1.04523	1.14002	0.845938	0.978893	0.137807	0.779381
3135	0.90953	0.973156	0.801787	1.17577	0.965062	0.157277	0.686928
3136	0.828038	0.63316	0.882364	0.585077	0.73216	0.14513	0.0344916
3138	1.14272	0.875254	1.10317	0.628439	0.937395	0.237314	0.6343
3141	0.884384	1.04523	1.14002	0.845938	0.978893	0.137807	0.779381
3143	0.965472	0.926676	0.86719	0.931489	0.922707	0.0408403	0.0323299
3144	0.965759	0.980969	1.04711	1.12387	1.02943	0.0721882	0.474626
3145	0.869092	0.750753	0.863306	0.685682	0.792208	0.0895028	0.0188302
3147	1.06811	0.518101	0.752183	0.622308	0.740174	0.238672	0.117651
3148	0.890552	1.04655	1.16736	0.916873	1.00533	0.127737	0.938704
3150	1.4856	0.859378	0.724624	0.677475	0.936769	0.373918	0.757492
3152	0.859016	0.804783	0.757227	0.631489	0.763129	0.0971136	0.0164663
3153	1.0317	1.05679	0.897121	1.06286	1.01212	0.0778436	0.775884
3154	1.19248	0.492371	1.19389	0.578638	0.864343	0.381341	0.528124
3155	0.864404	0.824066	0.791046	0.721191	0.800177	0.0606022	0.007097
3162	0.948091	0.89012	0.79808	0.995066	0.907839	0.0848326	0.118148
3171	0.940803	0.743018	0.760216	0.705137	0.787294	0.104894	0.0270123
3172	0.879128	0.445933	0.879972	0.597416	0.700612	0.215676	0.0692055
3174	0.936029	1.1472	0.836389	1.01208	0.982925	0.131034	0.811254
3176	0.520889	0.910812	0.691166	1.15564	0.819628	0.275057	0.281023
3178	0.886888	0.982581	0.858487	1.04383	0.942945	0.0856804	0.275068
3191	0.907073	1.04433	0.890398	1.02246	0.966064	0.0785512	0.451119
3195	0.89246	0.867218	0.744979	0.786565	0.822806	0.0687859	0.014176
3196	0.859577	0.441969	0.89142	0.551155	0.68603	0.223652	0.0674229
3209	1.12995	1.04254	0.665683	1.37579	1.05349	0.294526	0.740522
3212	0.936595	1.14504	0.962007	1.07538	1.02976	0.0977087	0.585506
3213	1.3079	1.14032	1.0722	1.419	1.23485	0.157732	0.0586962
3214	0.780678	0.84964	0.783553	1.28898	0.925712	0.244262	0.585973
3215	0.922562	0.557963	0.765476	0.681894	0.731974	0.153008	0.0393836
3216	0.879623	0.952594	0.851446	0.881223	0.891221	0.0431399	0.0150345
3218	1.24464	1.11044	1.06731	0.870911	1.07333	0.154634	0.412891
3219	1.2226	0.639769	0.960738	0.662223	0.871332	0.276121	0.420101
3220	1.18005	1.16689	1.12808	0.604099	1.01978	0.277999	0.895847
3221	1.40351	2.21754	1.01992	0.647121	1.32202	0.672147	0.408658
3222	1.03024	1.06559	0.901461	1.00953	1.00171	0.0707244	0.964572
3225	0.743123	1.08538	0.921632	1.04841	0.949636	0.154504	0.560933
3226	0.942355	1.05324	1.09608	1.05166	1.03583	0.0656282	0.354674
3227	0.927703	0.9334	0.975643	0.842904	0.919913	0.0556145	0.0635243
3228	1.11154	0.399959	1.22676	0.700442	0.859675	0.380736	0.514463
3229	1.00284	0.563441	0.823264	0.632342	0.755473	0.19818	0.0902462
3230	1.01165	1.45697	0.804203	1.0276	1.07511	0.274162	0.621895
3231	0.853699	0.809339	0.792954	0.764137	0.805032	0.0374403	0.00188921
3232	1.05887	1.12438	1.07457	1.13307	1.09772	0.0365395	0.0127814
3233	0.835134	1.18385	0.863864	1.33407	1.05423	0.24451	0.687385
3235	1.27216	1.17257	1.05653	0.659477	1.04018	0.268665	0.784365
3236	1.05939	0.777992	1.66058	0.923768	1.10543	0.387525	0.624185
3237	0.882723	0.854535	0.735336	0.997836	0.867608	0.107788	0.0911476
3238	1.17012	1.00132	1.13867	1.23253	1.13566	0.0976843	0.0691322
3239	1.23509	0.842913	1.05199	0.944176	1.01854	0.167718	0.839203
3240	1.2559	2.1707	1.22607	0.81633	1.36725	0.571948	0.289258
3241	1.04872	1.21423	0.977175	1.17297	1.10327	0.109614	0.15603
3242	1.77473	1.05728	1.01097	1.54705	1.34751	0.374089	0.160165
3243	1.10063	0.554643	2.14087	1.47205	1.31705	0.666033	0.411311
3244	1.29269	1.04739	1.03423	1.196	1.14258	0.124081	0.105166
3246	1.34823	1.95869	1.23756	3.99854	2.13576	1.2817	0.174468
3247	1.03401	1.1291	0.767022	0.926908	0.964258	0.155278	0.676579
3248	0.752202	0.890688	0.998484	0.973664	0.903759	0.111055	0.181479
3249	0.778357	0.965512	0.879159	1.2773	0.975081	0.215505	0.831987
3250	1.3396	1.02923	0.819792	1.02338	1.053	0.214449	0.655026
3251	1.40942	0.676837	0.812599	1.39818	1.07426	0.384565	0.725108
3252	0.820828	0.809989	0.777498	0.717117	0.781358	0.0466171	0.00256641
3254	1.02942	0.498976	1.2487	0.394367	0.792866	0.411871	0.388603
3256	1.21999	0.731985	1.08957	1.09487	1.0341	0.210236	0.766917
3257	2.34259	1.48054	1.3578	1.47008	1.66276	0.456618	0.0623559
3258	1.18024	1.46486	1.11615	0.687138	1.1121	0.321295	0.53553
3259	1.05887	1.12438	1.07457	1.13307	1.09772	0.0365395	0.0127814
3260	0.604759	1.69333	1.15216	1.08105	1.13283	0.445747	0.593166
3261	1.20167	0.603449	0.944745	0.871449	0.905327	0.246068	0.497642
3263	0.923155	0.694013	0.809141	1.0827	0.877252	0.165863	0.235413
3264	0.985234	1.11089	0.894694	1.07871	1.01738	0.0976227	0.745333
3266	1.83508	0.595925	1.52366	2.24943	1.55102	0.702715	0.306224
3267	1.08071	0.770394	0.875156	0.568993	0.823813	0.213245	0.197015
3269	0.936709	0.951151	1.04916	0.952846	0.972465	0.051637	0.364421
3270	0.810307	0.472568	1.26077	0.454637	0.749571	0.378035	0.277081
3271	0.750869	0.936634	0.778536	0.75613	0.805542	0.0882138	0.0216474
3272	1.19036	2.39997	1.73641	0.605564	1.48308	0.766071	0.296396
3273	0.847731	0.388313	0.862644	0.569888	0.667144	0.229519	0.0624787
3274	1.47394	1.5655	1.40646	1.80334	1.56231	0.173402	0.00744124
3275	0.949977	1.01454	0.911071	0.974183	0.962443	0.0433847	0.181823
3276	1.29661	0.757788	1.47125	1.6007	1.28159	0.370764	0.226083
3278	0.82919	0.806336	0.917004	0.834671	0.8468	0.0483844	0.00796246
3279	1.03178	1.4314	1.04686	1.10398	1.15351	0.187857	0.200711
3280	1.0245	1.24928	1.01897	0.56645	0.964799	0.286419	0.821694
3281	0.857723	0.931153	0.795856	0.88812	0.868213	0.0568718	0.0189262
3282	0.755583	0.764674	0.794214	0.724444	0.759729	0.028728	0.000465192
3284	1.08607	1.05107	0.986603	1.07269	1.04911	0.0440938	0.112273
3285	1.06995	0.887518	1.03937	1.05095	1.01195	0.0839052	0.794344
3286	1.04768	1.16765	1.04744	1.18883	1.1129	0.0759401	0.0589091
3287	1.00278	1.05793	0.999431	1.10528	1.04136	0.0503556	0.199012
3288	1.13609	0.565779	1.41876	0.320954	0.860394	0.505163	0.618975
3289	0.769931	1.37692	1.44403	0.702612	1.07337	0.391182	0.732508
3290	0.974568	0.859621	1.21508	1.07123	1.03013	0.150618	0.715921
3292	1.01601	1.04122	1.03245	1.07031	1.04	0.0227541	0.0390416
3293	1.13074	1.27665	1.05871	1.36777	1.20847	0.139638	0.0583258
3294	0.980826	0.642441	0.844368	0.694524	0.79054	0.153034	0.0714928
3295	1.33895	1.12927	0.891216	1.0902	1.11241	0.183509	0.30794
3296	0.916352	1.03106	0.987104	1.04509	0.994904	0.0579018	0.871482
3298	0.953918	1.06392	0.885837	0.996669	0.975087	0.0747691	0.552818
3299	0.999095	0.963371	0.959966	1.13563	1.01452	0.0826598	0.748648
3300	0.966848	1.01138	0.965558	1.01943	0.990804	0.028601	0.565958
3304	1.01867	0.778808	1.11117	0.835236	0.935973	0.155331	0.470147
3305	1.31276	1.64299	1.10059	1.31237	1.34218	0.224057	0.0552369
3306	0.430035	1.2635	1.30663	1.00084	1.00025	0.403451	0.999081
3307	0.785518	0.936371	0.973619	1.17919	0.968676	0.162206	0.725091
3311	1.08893	1.07066	0.972994	1.14559	1.06954	0.0718395	0.148276
3312	1.50502	2.48544	2.55589	3.09417	2.41013	0.661829	0.023703
3316	1.00417	1.04455	1.02952	1.26763	1.08647	0.121922	0.251114
3317	1.43443	0.554005	1.38599	0.595537	0.99249	0.483043	0.977147
3318	0.770081	0.542858	0.719267	0.67248	0.676171	0.0974034	0.00693232
3321	1.30867	0.665847	1.21048	0.937464	1.03061	0.289481	0.84604
3322	0.933922	0.799722	0.798872	0.799784	0.833075	0.0672325	0.0156863
3325	1.08435	0.553198	1.2803	0.32394	0.810448	0.44671	0.458421
3326	0.62427	0.691678	0.519116	0.766419	0.650371	0.105012	0.00690389
3327	1.11665	1.07835	1.02176	1.47982	1.17414	0.207479	0.191811
3328	1.04996	0.621378	1.32982	0.409544	0.852677	0.414911	0.528839
3330	1.05222	1.04849	0.932854	1.18636	1.05498	0.103641	0.366551
3331	1.13514	0.90312	0.779313	1.31761	1.03379	0.2399	0.796461
3332	1.22563	0.631821	0.916224	0.800995	0.893667	0.25024	0.457853
3333	0.875509	0.776296	0.86319	0.782609	0.824401	0.0522087	0.00670698
3334	1.13349	1.1123	0.991554	1.18545	1.1057	0.0820682	0.0820738
3335	1.1845	1.16019	0.80539	1.25872	1.1022	0.202261	0.386664
3336	0.96732	1.67725	0.736695	1.55647	1.23443	0.454196	0.377863
3337	0.947424	1.46598	0.778664	0.702529	0.97365	0.343804	0.887902
3339	0.863216	1.08733	0.838052	0.925661	0.928564	0.112068	0.292133
3341	1.14635	1.01833	0.959857	1.17229	1.07421	0.101692	0.240551
3342	0.978868	0.966652	0.969551	1.15425	1.01733	0.0914295	0.72985
3343	0.959073	0.803356	0.834853	0.857197	0.86362	0.0673592	0.0271227
3345	1.07802	1.17577	1.06857	1.1523	1.11867	0.0533965	0.0211813
3346	1.05082	0.827917	0.939754	1.0839	0.975597	0.116163	0.702653
3348	0.901232	1.07829	0.811988	1.02371	0.953805	0.120083	0.497695
3349	0.819205	0.613431	0.745992	0.701292	0.71998	0.0860701	0.00737263
3350	1.06705	1.03318	0.930163	1.19449	1.05622	0.109019	0.378228
3351	1.02819	1.1123	0.94595	0.951095	1.00939	0.0782468	0.825878
3352	1.00626	1.097	0.877731	0.929591	0.977645	0.095493	0.671564
3353	0.954988	0.700922	1.08212	0.485925	0.805989	0.265788	0.240436
3354	1.01751	0.950994	0.924159	0.611449	0.876028	0.180699	0.263619
3355	0.936595	1.14504	0.962007	1.07538	1.02976	0.0977087	0.585506
3357	0.973173	0.64664	1.38819	0.863154	0.967789	0.311368	0.849335
3358	0.729731	0.8115	0.474718	0.823945	0.709973	0.162309	0.037452
3360	0.633003	0.968085	0.927634	1.99685	1.13139	0.595984	0.689108

## Sheet: mix-8
Supplementary Table 1. BI measurement of compounds in mix-8 from four individual MS affinity assays
Hits are in bold red with mean BI >2.0 and p <0.05
Cpd ID	BI-1	BI-2	BI-3	BI-4	Mean	s.d.	p-value
3361	0.743476	0.656276	1.12345	1.0311	0.888576	0.223976	0.39309
3362	0.920968	0.985493	0.902329	0.998265	0.951764	0.0472309	0.133716
3363	1.01795	0.869704	0.900792	0.81314	0.900396	0.0863588	0.10434
3364	0.798944	0.551278	0.395626	0.280078	0.506482	0.224417	0.0217867
3365	0.999653	0.959184	1.31503	0.783021	1.01422	0.221497	0.90594
3366	1.01731	1.17484	1.08299	1.10973	1.09622	0.0652297	0.0600208
3367	0.858581	0.875996	0.937794	1.05237	0.931186	0.0876501	0.214396
3368	1.00784	0.762727	0.910588	0.863784	0.886235	0.101881	0.111656
3369	0.934038	0.887151	0.935242	1.04902	0.951364	0.06885	0.252586
3370	0.884406	1.1825	1.06108	1.08412	1.05303	0.124133	0.455717
3371	0.829568	1.03195	0.982352	1.02545	0.96733	0.0944413	0.538759
3373	0.803501	1.03766	0.806053	0.808601	0.863955	0.115825	0.100384
3374	0.585266	0.634856	0.938358	0.734575	0.723264	0.156261	0.0383097
3375	0.89745	0.741913	0.809373	0.757865	0.80165	0.0700545	0.010906
3376	0.942143	1.05864	0.91895	0.901167	0.955225	0.0709565	0.296132
3377	1.10675	0.661322	1.11566	1.02476	0.977124	0.214473	0.844751
3378	1.06962	1.03003	0.996385	1.18484	1.07022	0.0820683	0.185556
3379	1.4327	1.45273	0.860271	1.61371	1.33985	0.329826	0.131397
3380	0.501332	0.638777	1.67089	1.0581	0.967276	0.525465	0.908755
3382	0.875875	0.952754	1.01819	1.05816	0.976244	0.079781	0.593423
3383	1.21409	1.55692	1.98832	1.61872	1.59451	0.317181	0.0331449
3385	1.23197	1.17224	1.31362	1.08063	1.19961	0.0982363	0.0268675
3387	0.799406	0.829074	0.842461	0.877566	0.837127	0.0324114	0.0020973
3388	1.06918	1.04532	0.950545	1.14377	1.0522	0.0796953	0.28147
3390	0.91386	0.734788	0.709486	0.568616	0.731688	0.141753	0.0323191
3391	0.585067	0.561681	1.66292	1.18404	0.998429	0.528401	0.995628
3392	1.03018	1.01337	0.948763	0.982277	0.993646	0.0359033	0.746787
3393	0.68209	0.720768	0.675089	1.05015	0.782023	0.179874	0.0938607
3394	0.835804	0.674944	0.993063	1.10696	0.902692	0.188179	0.3771
3398	0.714298	0.663574	1.04958	0.838845	0.816575	0.171909	0.122549
3399	0.94938	1.16118	1.08651	1.01284	1.05248	0.0916031	0.335013
3400	1.07571	0.895526	1.01843	0.996244	0.996478	0.0751691	0.931243
3401	0.960184	1.06459	1.0961	0.599555	0.930107	0.227896	0.583001
3402	0.814163	0.899643	0.947109	0.811807	0.868181	0.0666219	0.0288065
3404	1.00213	0.885915	1.01716	0.916186	0.955346	0.0641957	0.258394
3405	1.08008	0.884637	0.939352	0.679991	0.896014	0.165884	0.298748
3409	0.692185	0.744484	1.27913	1.19706	0.978214	0.302701	0.894669
3410	0.988909	0.81266	0.840176	1.16512	0.951715	0.161968	0.593015
3411	1.61976	0.870274	1.44206	0.752789	1.17122	0.424342	0.478715
3412	0.966314	0.974468	1.04372	1.21989	1.0511	0.117764	0.449346
3413	0.900766	0.674241	1.15757	1.05452	0.946775	0.210108	0.647298
3417	0.669371	0.842101	1.28174	0.928564	0.930445	0.257798	0.626944
3418	0.893405	0.842639	1.03844	1.12192	0.974101	0.128822	0.714555
3421	0.877581	0.713496	0.882666	0.508886	0.745657	0.176324	0.0632729
3422	0.855667	0.836919	0.932857	0.874462	0.874977	0.0415197	0.00917608
3423	0.716295	1.23711	0.675431	1.09743	0.931565	0.278575	0.656899
3424	0.855453	0.912231	0.9723	0.950436	0.922605	0.0511898	0.0565862
3425	1.76794	1.19116	1.10444	1.10111	1.29116	0.320572	0.166899
3426	0.825694	1.05375	0.642994	0.678305	0.800186	0.186647	0.121728
3428	0.765073	0.713232	1.32159	1.1798	0.994924	0.301701	0.975268
3429	0.950597	1.07637	0.969632	1.30054	1.07428	0.160671	0.423341
3430	1.63236	0.887874	1.67262	1.17001	1.34071	0.378337	0.169491
3431	1.08436	1.08659	0.789523	0.937219	0.974422	0.141703	0.74202
3434	0.827633	0.965847	0.833875	1.17776	0.95128	0.16389	0.594004
3436	0.847691	1.12878	0.972286	0.971001	0.979939	0.115154	0.75054
3437	0.926589	1.1171	0.989382	1.07739	1.02762	0.0859326	0.56615
3438	1.4821	1.16989	1.02188	1.07039	1.18607	0.206749	0.169693
3441	0.966466	0.701321	1.16375	0.763337	0.898717	0.20986	0.405626
3442	0.912808	0.706913	0.918108	0.931419	0.867312	0.107219	0.0896588
3443	0.264971	0.740999	1.36429	1.0262	0.849114	0.465358	0.562892
3447	0.604769	1.00846	0.81123	1.13522	0.889918	0.232181	0.412963
3449	0.933946	1.11814	1.52637	1.29087	1.21733	0.252363	0.183476
3450	1.07382	1.05574	1.28258	1.15785	1.1425	0.103443	0.0704399
3455	0.97156	0.968393	1.63896	1.17199	1.18773	0.315539	0.319676
3456	1.89512	0.794829	1.14156	1.13004	1.24039	0.465167	0.377359
3457	1.89512	0.794829	1.14156	1.13004	1.24039	0.465167	0.377359
3458	1.33703	0.834066	1.45539	1.37228	1.24969	0.281492	0.174153
3461	0.791133	0.98371	0.926414	0.931675	0.908233	0.0822378	0.111815
3463	0.978741	0.929878	1.47485	1.2495	1.15824	0.2536	0.300577
3465	1.07658	1.20291	0.921303	0.629688	0.95762	0.247101	0.754217
3467	0.93868	0.687463	1.74746	1.00555	1.09479	0.456153	0.705644
3469	1.9034	0.995908	1.38829	0.922994	1.30265	0.449618	0.270909
3470	0.996894	1.09322	1.06556	1.13738	1.07326	0.0588799	0.0886
3471	0.888652	0.78208	0.889276	0.832656	0.848166	0.0514362	0.00970397
3475	1.44903	0.719029	1.07969	1.48839	1.18403	0.360543	0.382463
3479	0.870907	0.693898	1.05836	0.543173	0.791585	0.222646	0.157914
3481	1.17255	1.6091	1.28201	0.956168	1.25496	0.272162	0.157694
3486	0.949516	0.89479	0.971682	0.871212	0.9218	0.0467084	0.0441103
3492	1.18704	0.914488	1.07734	1.10686	1.07143	0.114437	0.300428
3495	0.759766	0.96879	0.900716	0.968647	0.89948	0.0985043	0.133926
3496	0.71033	0.664143	1.05285	0.847394	0.818679	0.174434	0.129131
3503	1.00347	1.05659	0.955108	1.0374	1.01314	0.0444885	0.596174
3505	0.85165	1.2849	2.17238	1.18792	1.37421	0.563568	0.276174
3508	0.731599	0.54483	1.26783	1.05368	0.899486	0.323224	0.57804
3509	0.917143	0.789807	0.772709	0.784473	0.816033	0.0677841	0.0122708
3510	0.951524	0.988916	1.02684	1.02789	0.998792	0.0363546	0.951191
3511	1.08005	0.91741	0.972887	0.938205	0.977138	0.0723234	0.572138
3512	0.829226	0.68098	1.20945	0.973868	0.923381	0.225098	0.544857
3513	0.873654	0.67845	1.15601	1.14479	0.963226	0.2304	0.770499
3514	1.0274	1.12973	0.969396	1.22574	1.08807	0.113214	0.217617
3515	0.768616	0.655628	1.21125	0.882929	0.879605	0.239779	0.389263
3516	0.73265	0.679922	0.582436	0.70657	0.675395	0.0656047	0.00219472
3517	1.00291	1.08792	0.987659	1.06265	1.03529	0.0477357	0.235842
3518	1.22019	1.24508	1.39262	1.35907	1.30424	0.0844219	0.00550543
3519	0.854983	1.13587	0.943533	1.27187	1.05156	0.187935	0.621379
3520	0.956803	1.17452	1.16088	1.31471	1.15173	0.147381	0.13162
3523	1.1325	0.544533	1.26319	0.709472	0.912423	0.340589	0.642552
3525	3.21193	1.02007	1.21202	1.55336	1.74935	0.999689	0.230786
3526	0.771423	0.656785	0.795139	1.01508	0.809607	0.149713	0.0844247
3527	1.15979	1.00171	1.0676	1.04171	1.0677	0.0671089	0.136962
3528	0.805313	0.789475	0.874077	0.836591	0.826364	0.03735	0.00263352
3529	0.924669	0.832069	0.781131	0.762922	0.825198	0.0724842	0.0169838
3530	1.03677	0.824166	1.00973	1.06604	0.984179	0.109126	0.790733
3531	0.843461	0.925128	0.962579	0.86439	0.898889	0.0547944	0.0345035
3532	1.05944	1.14365	0.943545	1.03624	1.04572	0.0822754	0.347473
3533	0.969288	1.06226	1.58971	1.05355	1.1687	0.283785	0.319993
3534	0.957134	1.01763	1.03913	1.20415	1.05451	0.105624	0.377915
3535	1.2658	0.993175	0.942161	0.957491	1.03966	0.152269	0.638458
3537	1.03307	0.999458	1.04672	0.986662	1.01648	0.0280986	0.325513
3538	1.6747	0.949938	1.57028	1.05096	1.31147	0.363998	0.185535
3539	1.09489	1.1133	1.00165	0.919918	1.03244	0.0895314	0.521066
3540	0.941509	0.966403	1.02968	1.12136	1.01474	0.0801892	0.73758
3541	0.695852	0.792744	1.19574	1.14727	0.957903	0.250584	0.759005
3542	0.986668	1.31846	1.12485	1.01278	1.11069	0.150927	0.238709
3544	0.953414	1.04825	1.11572	1.0723	1.04742	0.0686097	0.260803
3546	0.516738	0.874616	1.20825	0.833204	0.858202	0.282857	0.389923
3548	0.656164	0.624366	1.34745	1.05393	0.920478	0.345281	0.676406
3549	1.15658	1.06742	1.21738	1.22725	1.16716	0.0734697	0.0198859
3551	1.01571	1.10258	0.979516	1.12175	1.05489	0.0682182	0.205939
3552	0.922104	1.04693	0.968894	0.976275	0.97855	0.0515101	0.466032
3553	0.861602	0.996436	1.35517	1.12619	1.08485	0.210112	0.478377
3554	1.4967	0.909127	0.856617	0.947941	1.0526	0.298423	0.747781
3555	1.001	1.04977	1.05619	1.13917	1.06153	0.0573255	0.121075
3556	0.737263	0.594452	1.24975	1.18007	0.940384	0.323566	0.736974
3557	0.809417	0.746279	1.09806	0.955949	0.902427	0.157237	0.302773
3558	1.02465	1.02373	1.18382	1.08023	1.07811	0.0752647	0.129552
3559	0.902625	1.12627	1.20998	0.825629	1.01613	0.181553	0.870311
3560	0.792334	0.681999	1.12036	1.12639	0.93027	0.227494	0.5832
3561	1.11309	1.01614	0.85336	0.785384	0.941994	0.149615	0.494613
3562	0.920767	0.936743	1.0419	0.948039	0.961862	0.0545189	0.25626
3563	0.924487	0.896308	0.922798	0.95806	0.925413	0.0253026	0.00974191
3565	0.926347	0.949839	0.96457	1.00378	0.961135	0.032499	0.096588
3566	0.826715	0.908588	0.912527	1.0288	0.919157	0.083111	0.14693
3567	0.814333	0.792127	0.992429	0.869357	0.867062	0.089662	0.05929
3569	0.898852	1.02155	1.00635	0.933756	0.965126	0.0584778	0.318712
3570	0.872811	0.653897	1.48718	1.45222	1.11653	0.417729	0.61584
3571	0.962108	0.995118	0.973315	1.03273	0.990817	0.0311199	0.596565
3572	0.823422	1.04907	0.862853	0.771386	0.876682	0.120874	0.13399
3573	0.758254	0.66164	1.23299	0.870067	0.880739	0.249803	0.410098
3576	0.989121	0.931222	0.955182	0.98276	0.964571	0.0266697	0.0765449
3577	0.64652	0.684928	1.36038	1.06791	0.939935	0.338758	0.746337
3578	0.723477	1.10232	0.730406	0.661065	0.804317	0.201101	0.14683
3579	0.62144	0.950685	0.986363	1.55846	1.02924	0.389181	0.8901
3581	1.00674	1.1075	0.898272	0.952072	0.991146	0.0893211	0.855521
3582	0.915688	1.02195	0.957448	1.05999	0.98877	0.0645384	0.750817
3583	0.725175	0.569589	1.09334	1.13014	0.87956	0.275927	0.446923
3584	0.930784	0.940263	0.895707	1.00085	0.9419	0.0437223	0.0764915
3587	0.84352	0.93028	0.889493	0.895587	0.88972	0.0356557	0.00850855
3588	1.14678	1.03253	1.00458	1.03914	1.05576	0.0625039	0.172393
3589	1.05448	0.930313	1.06986	1.12275	1.04435	0.0814558	0.355821
3590	0.576845	0.569137	1.44901	1.03996	0.908738	0.422136	0.694661
3592	0.613724	0.486002	1.75164	1.45416	1.07638	0.622169	0.821887
3593	0.960939	1.07886	0.963329	1.14804	1.03779	0.0918185	0.470749
3594	0.916615	0.83082	0.852573	0.799417	0.849856	0.0495666	0.00902373
3596	0.755491	0.609007	1.3065	1.14552	0.954129	0.326271	0.796846
3597	0.946708	1.0073	0.929305	1.10146	0.996193	0.0777349	0.928158
3598	0.850206	0.927639	0.979242	0.947263	0.926087	0.0548761	0.0741747
3599	0.991623	0.925477	0.967566	1.00622	0.972722	0.0352997	0.219937
3600	0.666312	0.715264	1.97027	1.3845	1.18409	0.618099	0.59335
3601	1.05459	0.859579	1.03085	0.881623	0.956662	0.100251	0.45086
3602	0.7927	0.667084	0.731124	0.728591	0.729875	0.051293	0.00182786
3603	0.822515	0.851675	0.796299	0.702214	0.793176	0.0647216	0.00775736
3604	0.827025	0.733954	1.20174	1.09461	0.964332	0.220048	0.767087
3606	0.695643	0.61872	1.30286	0.74665	0.840969	0.312387	0.383558
3607	1.63821	1.0444	1.45382	1.11588	1.31308	0.280827	0.112031
3608	0.856382	0.666994	1.07356	1.47371	1.01766	0.34645	0.925227
3609	0.979707	0.752581	1.39056	0.931784	1.01366	0.269612	0.925693
3611	1.03223	0.814375	0.945992	0.90823	0.925208	0.0902937	0.196169
3612	0.949225	0.742393	0.685109	0.567923	0.736163	0.159526	0.0454679
3613	0.930332	0.812718	0.804932	0.893159	0.860285	0.0614111	0.0198885
3615	0.870808	1.0632	0.986868	0.896341	0.954305	0.0880348	0.375538
3616	1.21952	1.48098	1.25773	1.37609	1.33358	0.118738	0.0111459
3617	0.953668	0.929241	0.918312	1.01102	0.953059	0.0413686	0.107985
3618	0.901735	0.754883	0.914947	0.798464	0.842507	0.0782586	0.0275562
3619	0.670577	1.50396	0.769719	0.795162	0.934854	0.38319	0.756256
3620	0.803503	0.699972	1.12139	1.10897	0.933459	0.214109	0.578265
3621	0.92196	0.92289	0.931306	0.989454	0.941402	0.0323087	0.0360604
3622	0.919428	0.428956	1.62434	1.06739	1.01003	0.492113	0.970049
3623	0.867579	0.868811	0.9237	1.21913	0.969804	0.168263	0.743434
3624	1.20886	1.00482	1.03596	1.02173	1.06784	0.0948681	0.248021
3625	0.974377	0.942205	0.919538	0.9099	0.936505	0.0286504	0.0213398
3626	0.978146	0.880843	0.882378	0.884517	0.906471	0.047807	0.0296674
3627	0.687534	0.511313	1.00742	0.751197	0.739367	0.205499	0.084933
3628	0.952282	1.17942	0.978067	1.04889	1.03966	0.101728	0.492382
3630	0.83801	0.749139	0.915478	1.03843	0.885265	0.12266	0.15813
3631	1.07332	1.09147	1.11373	1.13088	1.10235	0.0251988	0.00389982
3632	0.745619	0.810493	0.904611	1.02264	0.87084	0.120423	0.121267
3633	0.983213	0.93211	1.4816	1.24569	1.16065	0.254266	0.295621
3634	0.864544	0.539109	1.24144	0.884348	0.882359	0.286983	0.472377
3635	0.925841	0.788176	0.729247	0.759781	0.800761	0.0867889	0.0194109
3636	1.05721	1.02309	0.956334	1.10401	1.03516	0.0621437	0.340084
3637	0.945634	0.898669	0.96257	1.28913	1.024	0.178809	0.80575
3638	1.06608	0.64023	1.0994	0.678327	0.871007	0.245354	0.370257
3639	1.66725	1.10904	1.13088	0.865798	1.19324	0.338074	0.335921
3640	0.811222	0.927368	1.0298	1.16947	0.984465	0.152267	0.851377
3641	1.02034	1.06603	0.935567	0.955124	0.994266	0.0600217	0.860675
3642	1.07765	0.930461	1.03391	0.908076	0.987524	0.0813272	0.779046
3643	0.884568	0.750314	1.28283	1.38217	1.07497	0.305087	0.656799
3644	0.912839	0.691704	1.6179	1.05215	1.06865	0.395099	0.751174
3646	1.08825	1.09798	0.975608	1.10369	1.06638	0.0608506	0.117153
3647	0.59634	0.639345	0.935136	0.733524	0.726086	0.150682	0.035851
3649	0.915842	0.876879	1.38318	1.00997	1.04647	0.231322	0.714778
3650	0.893684	0.949781	0.919896	1.04074	0.951026	0.064051	0.223684
3651	1.09619	1.19214	1.15303	1.30848	1.18746	0.0897839	0.0250103
3652	0.822005	1.40197	0.925166	0.815968	0.991278	0.278346	0.953973
3653	3.29077	0.999514	1.58327	1.70585	1.89485	0.980308	0.165386
3654	2.53733	1.06007	1.57971	1.40823	1.64633	0.632115	0.133406
3655	0.958876	0.999945	0.995683	1.05964	1.00354	0.0417003	0.876115
3656	0.655669	0.614308	0.525966	0.983769	0.694928	0.200015	0.0554067
3658	0.865242	0.922661	1.04825	1.07419	0.977586	0.0999398	0.684173
3659	0.98819	1.25298	0.933316	0.85026	1.00619	0.174025	0.947791
3661	0.838973	0.84685	0.83921	0.985458	0.877623	0.0719831	0.0424561
3662	0.805223	0.754836	0.928671	0.956547	0.861319	0.0967645	0.0642413
3665	0.846804	0.592027	1.11137	0.763982	0.828544	0.216356	0.211157
3666	1.00915	0.958386	1.10744	1.14682	1.05545	0.0868273	0.291406
3669	0.82508	0.690156	1.35749	1.53906	1.10295	0.409306	0.64955
3670	1.19325	1.02767	0.812439	0.966274	0.999909	0.157511	0.999147
3671	0.808487	0.630594	1.42763	1.36785	1.05864	0.398985	0.78796
3672	1.00696	0.966457	0.996757	1.04748	1.00441	0.0334708	0.809051
3674	2.46922	1.36873	1.30403	0.937816	1.51995	0.660679	0.213555
3675	0.756883	0.649018	1.43236	0.850282	0.922136	0.349951	0.68647
3677	2.10918	1.59569	1.65608	0.907172	1.56703	0.496016	0.106313
3678	0.888488	0.855119	1.21193	1.03952	0.998764	0.163193	0.988865
3680	0.766662	1.19778	1.38833	1.16189	1.12866	0.260994	0.396849
3681	0.859162	0.696788	1.52628	1.18957	1.06795	0.367975	0.736415
3682	1.08327	1.15779	0.818716	0.96347	1.00581	0.148206	0.942421
3683	0.79889	1.12044	0.921232	1.03051	0.967769	0.138962	0.674319
3684	2.29952	0.880941	1.26992	1.72451	1.54372	0.610507	0.172908
3685	0.733314	0.649433	1.20549	1.24649	0.958681	0.311004	0.807672
3686	1.12793	1.03089	0.99501	1.03856	1.0481	0.0565032	0.187222
3689	0.956121	0.938466	0.958882	0.998443	0.962978	0.0253139	0.0612456
3691	0.938366	1.1844	0.948963	0.948792	1.00513	0.119617	0.937039
3692	0.822906	1.14897	1.34003	1.22314	1.13376	0.221659	0.313948
3693	1.93869	1.61387	1.53063	0.72502	1.45205	0.515672	0.17784
3696	0.974391	0.939437	1.05966	1.10017	1.01841	0.0742987	0.654146
3698	1.07331	1.09545	1.06386	1.14149	1.09353	0.0346084	0.0124167
3699	0.91023	1.01143	0.956259	1.046	0.980981	0.059923	0.570678
3700	1.93905	1.07457	2.01385	1.49757	1.63126	0.435464	0.212132
3701	0.727356	0.694525	1.55543	1.04579	1.00578	0.399214	0.978734
3702	1.0156	1.09585	1.04847	0.936864	1.0242	0.066893	0.521738
3704	0.798047	0.6596	1.09889	1.24007	0.94915	0.266912	0.728568
3705	1.0703	0.915739	0.965218	0.839832	0.947771	0.0965986	0.358712
3706	1.07969	0.976715	1.04381	0.959406	1.01491	0.0564825	0.634196
3707	1.09952	1.12823	1.13101	1.21783	1.14415	0.0511437	0.0110462
3708	0.907604	1.00643	0.965673	1.03611	0.978953	0.0556438	0.504344
3709	0.888602	0.776399	0.872375	0.918889	0.864066	0.0615418	0.0215318
3710	1.39598	0.639066	2.43083	1.48859	1.48862	0.73441	0.275409
3711	0.993524	0.907379	0.923562	0.835396	0.914965	0.0648954	0.0789561
3712	0.642147	0.806958	0.663041	0.709424	0.705393	0.0733153	0.00402292
3713	0.886542	0.743854	1.45412	1.02396	1.02712	0.30678	0.870924
3714	0.981159	0.957883	1.0146	0.911983	0.966405	0.0431067	0.216964
3717	1.22156	0.56421	1.37935	0.580831	0.936489	0.425237	0.784658
3719	0.736505	0.725127	0.891208	0.724417	0.769314	0.0814512	0.0108971
3720	0.955892	0.977564	0.953837	1.0754	0.990672	0.0574929	0.766877
3723	1.00402	1.03936	0.986878	1.02236	1.01316	0.0226982	0.330259
3724	0.974391	0.939437	1.05966	1.10017	1.01841	0.0742987	0.654146
3725	0.819339	0.713686	1.10486	1.2621	0.974996	0.252854	0.855862
3726	0.49556	0.441514	0.532627	0.435435	0.476284	0.0462737	0.000188822
3727	0.718621	0.867507	1.66914	1.54005	1.19883	0.475392	0.464274
3728	1.00846	0.859683	1.17047	0.944707	0.995831	0.131415	0.953402
3729	0.932206	0.893279	1.12829	0.827419	0.945299	0.129434	0.460064
3730	0.987466	0.975936	1.05439	1.00312	1.00523	0.0346164	0.782319
3731	0.953667	1.07353	1.03042	1.02546	1.02077	0.0496714	0.464377
3732	0.985789	0.90287	0.913496	0.848924	0.91277	0.0562928	0.0533301
3733	0.86694	0.941065	0.988602	0.988147	0.946189	0.057347	0.157208
3734	1.01011	1.06556	1.07402	1.24764	1.09933	0.102856	0.148951
3737	0.921507	0.571136	0.934399	0.561374	0.747104	0.208931	0.0940967
3738	0.83226	0.808461	0.920884	0.970875	0.88312	0.0759114	0.0541623
3739	0.927884	1.03791	1.16579	0.981526	1.02828	0.102091	0.618202
3740	0.975964	0.90686	0.862448	1.19476	0.985009	0.14743	0.851862
3741	1.01103	0.859886	0.921527	0.867842	0.915072	0.0695851	0.0924191
3742	0.891986	0.639707	1.21643	1.06997	0.954525	0.248292	0.738448
3743	0.799071	0.72665	1.20966	0.868275	0.900914	0.213797	0.422337
3744	1.50821	1.0859	0.781305	0.927388	1.0757	0.314024	0.662699
3745	0.898771	0.918968	1.07672	0.713182	0.901909	0.148858	0.279133
3746	0.882615	1.01716	1.05616	0.989316	0.986313	0.0743698	0.737259
3748	1.11485	0.870051	1.57226	1.27083	1.207	0.294116	0.253976
3749	0.80413	0.953667	0.856146	0.911567	0.881378	0.065169	0.0357305
3750	0.608748	0.679569	1.27905	1.2591	0.956615	0.362043	0.826031
3751	0.587397	0.811933	1.5749	1.03395	1.00204	0.423185	0.992898
3752	0.921077	0.848495	0.9873	1.03751	0.948595	0.0820183	0.298821
3753	0.921548	0.91671	1.47953	1.298	1.15395	0.281097	0.35343
3754	0.735121	1.12912	1.26117	1.33481	1.11505	0.2672	0.452466
3756	1.15901	0.738665	1.53982	1.11683	1.13858	0.327522	0.459577
3757	0.637795	1.31405	0.643464	0.846892	0.860551	0.317594	0.444508
3758	1.12298	0.945395	1.08517	1.1448	1.07459	0.0895802	0.194455
3759	1.01584	1.04421	0.941405	0.905527	0.976746	0.0642938	0.521755
3761	1.49155	1.10406	1.46914	1.3537	1.35461	0.177623	0.0281394
3762	1.27234	1.58893	1.19307	1.04349	1.27446	0.23012	0.0971491
3763	1.42208	1.23166	1.22278	1.05628	1.2332	0.149541	0.0525171
3764	0.944111	0.937617	0.924162	1.0967	0.975648	0.0811301	0.590619
3766	0.745958	0.573154	0.931335	0.732889	0.745834	0.146511	0.0403587
3767	0.934858	0.949916	0.877325	0.890351	0.913112	0.034767	0.0154069
3771	1.25985	0.93733	1.14131	1.05109	1.09739	0.136728	0.249475
3772	0.903497	0.939732	1.03715	1.04446	0.981209	0.0704493	0.630712
3774	0.966839	1.01778	1.18119	0.990755	1.03914	0.0969569	0.478532
3775	1.01048	1.16487	1.06761	1.12979	1.09319	0.0682464	0.071882
3776	1.01534	1.05201	1.05988	1.0372	1.04111	0.0195832	0.0246574
3777	0.88953	1.02517	1.00792	0.934721	0.964336	0.0634391	0.342704
3779	1.12717	0.824143	1.23131	0.911591	1.02355	0.188149	0.818459
3780	0.983662	0.928917	0.966729	1.01024	0.972388	0.0340678	0.203464
3781	0.809975	0.838984	2.09774	0.860792	1.15187	0.630921	0.663145
3782	0.886859	1.00882	1.11967	1.10194	1.02932	0.106697	0.620847
3783	1.59787	1.0048	0.947782	0.853545	1.101	0.337067	0.591221
3785	0.742003	0.948172	1.27237	1.2845	1.06176	0.264018	0.67178
3786	1.03195	1.01402	1.07594	1.10193	1.05596	0.040198	0.0687536
3790	0.928007	1.1152	0.899208	0.958973	0.975346	0.096375	0.644198
3793	1.04301	1.17869	0.980876	1.1403	1.08572	0.0902544	0.153713
3794	1.02792	1.04274	0.963469	0.982896	1.00426	0.0372419	0.833881
3796	0.875604	0.653138	1.23511	1.15577	0.979905	0.266904	0.889864
3799	0.638437	0.688275	1.10584	0.839077	0.817906	0.210051	0.181368
3800	0.839181	0.586942	1.15983	0.879397	0.866339	0.234599	0.337246
3801	0.904829	0.969017	0.968334	1.06554	0.976929	0.0662971	0.536505
3803	0.904925	1.1353	1.0515	1.19127	1.07075	0.124578	0.338569
3804	1.0545	0.806113	0.973332	0.859991	0.923484	0.11174	0.264343
3805	1.04177	1.10754	1.17236	1.0661	1.09694	0.0571398	0.0426727
3806	1.67238	0.936863	1.5538	1.10427	1.31683	0.352196	0.169825
3807	1.24037	0.786584	1.10028	1.48843	1.15392	0.292793	0.370305
3808	0.860842	1.07054	0.911705	1.03347	0.969141	0.0990771	0.577478
3809	0.875731	0.869012	0.868272	0.920127	0.883285	0.0247891	0.00253766
3810	0.962875	0.899194	0.976588	0.942686	0.945336	0.0337661	0.04793
3811	0.98818	0.819562	0.97348	0.900177	0.92035	0.0774359	0.131851
3813	0.58948	0.66249	1.67713	1.6594	1.14712	0.602542	0.658773
3815	1.00657	1.00751	1.35236	1.14664	1.12827	0.163246	0.214104
3818	1.28738	0.947443	1.16553	0.916832	1.0793	0.177496	0.437425
3820	1.33726	0.856892	1.24833	1.33733	1.19495	0.229243	0.187532
3821	0.926477	1.03847	0.94903	0.990405	0.976096	0.0492956	0.403668
3822	1.0719	0.934118	1.00867	1.15154	1.04156	0.0924499	0.434884
3823	1.17709	1.69233	3.28092	1.55848	1.92721	0.928498	0.139702
3824	0.544312	0.672987	1.03059	0.821214	0.767276	0.208844	0.112134
3825	0.950533	0.952247	0.954267	0.987278	0.961081	0.017531	0.0212425
3826	0.973115	0.820807	1.09358	0.84366	0.932791	0.126445	0.365745
3827	0.965479	1.12091	1.07729	0.875179	1.00972	0.111038	0.872227
3828	0.716324	0.633737	1.25527	0.883488	0.872206	0.275703	0.422282
3829	0.978199	0.903779	1.14064	0.92935	0.987991	0.106344	0.835833
3830	0.920915	1.01449	1.16135	1.0098	1.02664	0.0995933	0.62981
3832	0.844896	0.891562	0.814398	0.867538	0.854598	0.0328835	0.00304767
3833	1.04177	1.10754	1.17236	1.0661	1.09694	0.0571398	0.0426727
3834	0.911953	1.0217	0.921819	0.998055	0.963382	0.0546978	0.273006
3835	0.760242	0.777192	0.841863	0.758443	0.784435	0.0392057	0.00161033
3836	0.828025	0.90679	1.06152	1.12375	0.980021	0.13634	0.788571
3837	0.948434	0.976349	0.903436	0.809962	0.909545	0.0728681	0.0890566
3839	0.938366	1.1844	0.948963	0.948792	1.00513	0.119617	0.937039
3840	0.671148	1.05583	1.20216	1.03	0.989785	0.225546	0.933538

## Sheet: mix-9
Supplementary Table 1. BI measurement of compounds in mix-9 from four individual MS affinity assays
Hits are in bold red with mean BI >2.0 and p <0.05
Cpd ID	BI-1	BI-2	BI-3	BI-4	Mean	s.d.	p-value
3841	1.2344	0.959414	0.852336	0.956901	1.00076	0.163555	0.993141
3842	1.10457	1.0104	1.13171	0.907605	1.03857	0.101613	0.502957
3843	1.13754	1.12384	1.56396	0.95574	1.19527	0.259321	0.229152
3844	0.978964	1.13418	1.50235	1.01803	1.15838	0.238602	0.2763
3845	1.13695	0.977063	0.95564	1.03832	1.02699	0.0812479	0.553905
3846	1.12974	0.881911	0.842263	0.956079	0.952498	0.127228	0.509425
3848	1.17333	1.17956	1.2776	1.19543	1.20648	0.0483166	0.0033655
3849	1.23042	0.654146	1.40763	0.537112	0.957327	0.426556	0.854212
3850	1.62287	0.636639	1.19979	1.0659	1.1313	0.406324	0.564135
3851	1.11474	0.992373	0.983705	1.03682	1.03191	0.0599209	0.364963
3852	1.12226	0.936951	0.982705	1.03584	1.01944	0.0795708	0.658619
3853	1.24309	1.04712	0.748964	1.08498	1.03104	0.206319	0.783143
3855	1.10991	1.09262	1.41819	0.785658	1.10159	0.258325	0.488956
3856	1.33148	1.50486	1.20921	0.847837	1.22335	0.278178	0.206673
3857	1.19645	1.13629	1.26751	1.19953	1.19994	0.05363	0.00499398
3858	0.998996	1.08129	1.21585	0.795643	1.02295	0.175933	0.811086
3859	1.49905	0.872506	1.38508	1.13125	1.22197	0.279126	0.209951
3862	0.831533	0.985237	1.24495	0.83855	0.975069	0.193375	0.813196
3863	0.835595	1.03541	1.83912	0.46629	1.0441	0.580078	0.88879
3864	1.08677	0.615892	1.17213	0.436822	0.827902	0.357489	0.406665
3868	1.22852	1.52031	1.21597	1.13261	1.27435	0.169406	0.0478879
3869	1.00973	0.987781	1.15996	1.05161	1.05227	0.0765181	0.265267
3870	1.08816	0.950591	1.09305	0.950065	1.02047	0.0810129	0.648172
3872	1.21875	1.11637	1.28694	0.807453	1.10738	0.211882	0.385428
3874	1.04763	0.806373	0.847466	0.887372	0.897209	0.10559	0.146706
3875	1.05155	1.01943	1.29892	1.05728	1.10679	0.129161	0.19677
3876	1.07149	0.902096	1.04389	0.910722	0.98205	0.0881365	0.711092
3877	1.08914	1.0128	0.978204	1.04589	1.03151	0.0473253	0.275157
3878	1.12288	0.621682	1.27464	0.38801	0.851804	0.416467	0.528011
3879	1.07598	0.960926	0.944783	0.919746	0.97536	0.0691885	0.527697
3880	1.34423	1.1355	1.19003	1.30938	1.24478	0.098324	0.0155698
3882	0.975503	0.575796	1.23965	0.471153	0.815526	0.356622	0.376956
3883	1.08399	0.868904	0.91907	0.874228	0.936549	0.100837	0.297243
3884	1.11088	0.893474	1.05367	0.709074	0.941773	0.180368	0.564494
3885	1.1507	1.05702	1.00806	0.847157	1.01573	0.127013	0.820328
3887	1.18973	0.904432	0.907481	1.14207	1.03593	0.151338	0.667355
3888	1.19864	1.23491	1.23618	1.587	1.31418	0.182708	0.0412615
3889	1.18403	1.00291	1.06123	1.20341	1.11289	0.0966432	0.101562
3890	0.926112	1.06215	1.08464	1.09565	1.04214	0.0785963	0.362186
3891	1.21071	1.13328	1.13616	1.05549	1.13391	0.0633868	0.0242464
3893	0.953647	0.888318	1.09492	0.7838	0.93017	0.130216	0.362089
3895	0.788521	0.630946	0.936538	0.631631	0.746909	0.146546	0.0408153
3897	1.1125	1.12428	1.45796	1.0017	1.17411	0.197123	0.175481
3899	0.842542	0.978044	1.00245	1.07856	0.975399	0.098374	0.651357
3900	1.01871	0.796728	1.639	0.580784	1.0088	0.456588	0.971662
3901	1.20102	1.20316	1.98007	2.19292	1.64429	0.517951	0.0886521
3902	1.49727	0.756554	1.64004	0.559511	1.11334	0.535052	0.700343
3903	1.03646	1.01029	1.00099	1.20198	1.06243	0.0942374	0.277049
3904	1.10202	0.891266	0.743613	0.748035	0.871233	0.168451	0.223775
3905	1.14645	1.12328	1.32085	0.66286	1.06336	0.281186	0.682816
3907	1.1875	1.0723	1.01965	1.25901	1.13462	0.108582	0.0893068
3908	1.29683	1.13447	1.04758	1.29653	1.19385	0.123918	0.0521166
3909	1.15949	0.945587	0.959359	0.967494	1.00798	0.101407	0.884918
3910	1.22108	1.2597	1.20912	1.35978	1.26242	0.0683993	0.0045985
3911	1.29683	1.13447	1.04758	1.29653	1.19385	0.123918	0.0521166
3912	1.09206	1.08403	1.31694	0.930746	1.10594	0.159045	0.27494
3913	0.81607	0.856129	1.1625	0.457452	0.823038	0.288693	0.307672
3914	1.03045	0.791186	0.679495	0.923092	0.856055	0.153066	0.156567
3915	1.15787	1.01512	1.07724	1.06236	1.07815	0.0593836	0.0781936
3917	1.03303	1.09831	1.19417	1.20097	1.13162	0.0807314	0.0471072
3918	1.46095	0.986432	1.17204	0.712664	1.08302	0.314775	0.634369
3919	0.952369	1.03272	1.60332	1.69925	1.32191	0.38374	0.191984
3920	0.889876	0.842854	0.934418	1.01092	0.919517	0.0714901	0.109776
3921	0.923467	0.890354	0.981423	1.03293	0.957045	0.0630569	0.266327
3922	1.01291	0.97088	1.16356	0.777001	0.981087	0.159231	0.827529
3923	1.10881	1.10107	1.03741	1.32775	1.14376	0.126765	0.108112
3924	1.62131	0.905097	1.12143	0.650425	1.07457	0.412207	0.74149
3925	1.15188	0.773413	1.02494	0.86018	0.952604	0.168914	0.61386
3926	1.1151	0.957849	0.923211	1.31509	1.07781	0.178872	0.448294
3929	1.1062	0.433696	0.58177	0.605471	0.681785	0.292977	0.118202
3930	1.56475	0.58383	1.34197	1.06476	1.13883	0.422762	0.558216
3931	2.71859	2.1349	2.79116	1.9966	2.41032	0.402945	0.00598616
3932	1.15692	0.966115	1.09385	0.81283	1.00743	0.152089	0.928327
3933	1.34465	0.881487	1.30408	1.12928	1.16488	0.210771	0.21566
3934	1.09071	0.931002	1.03806	0.98825	1.012	0.0683091	0.748484
3935	1.28991	1.01573	1.51696	1.12958	1.23804	0.21731	0.116165
3938	1.24912	1.11802	1.39892	0.997064	1.19078	0.172768	0.114258
3940	1.09395	1.05618	1.41034	0.953014	1.12837	0.197192	0.283864
3941	1.18638	1.41968	1.25418	1.18169	1.26048	0.111182	0.0183722
3942	0.778832	0.740636	1.72262	0.904748	1.03671	0.46262	0.883984
3943	2.883	2.49443	2.14047	2.53729	2.5138	0.303649	0.00214678
3945	1.24543	1.0027	1.09398	0.847226	1.04733	0.166787	0.610023
3946	0.983233	0.981315	1.08253	0.782673	0.957438	0.125734	0.54693
3948	1.1152	1.03661	1.17871	0.887213	1.05443	0.125721	0.450241
3949	1.21698	1.07646	1.179	1.19962	1.16801	0.0629777	0.0128688
3951	1.03995	0.977155	1.16597	1.04421	1.05682	0.0789615	0.245701
3952	1.09764	1.00143	1.05838	0.984127	1.03539	0.0522307	0.268341
3957	1.41956	0.949918	1.35699	0.84396	1.14261	0.288085	0.395148
3958	1.24266	1.14771	1.38224	0.858438	1.15776	0.221582	0.249645
3959	1.09287	0.928406	0.979723	1.13538	1.03409	0.096331	0.530075
3963	1.08225	1.058	1.13532	0.928338	1.05098	0.0879046	0.330044
3964	1.23006	1.39369	1.74888	0.995531	1.34204	0.316646	0.119532
3965	0.918521	1.34887	0.533065	0.87106	0.91788	0.334679	0.657265
3966	1.12717	0.92626	1.06676	0.955035	1.0188	0.0942914	0.716693
3967	1.0609	0.855157	1.26451	0.864499	1.01127	0.193657	0.914711
3968	1.18766	1.19912	1.22605	1.25659	1.21735	0.0307135	0.000764037
3969	0.968533	0.918606	1.08204	0.884196	0.963343	0.0863737	0.458356
3971	1.27708	1.26091	0.730716	0.700423	0.992282	0.319828	0.96454
3972	1.09899	0.942433	1.31968	0.788984	1.03752	0.226718	0.762415
3973	1.17084	0.961363	1.11571	0.72576	0.993418	0.19925	0.951477
3976	0.935856	1.04636	1.11394	1.05441	1.03764	0.0742506	0.385278
3977	1.1169	0.981208	1.11055	1.07505	1.07093	0.0625831	0.108263
3980	1.20913	1.00745	1.20013	0.585498	1.00055	0.291921	0.997225
3981	1.0776	0.979034	1.09264	0.942395	1.02292	0.0736218	0.577699
3982	1.19365	0.871976	0.935593	0.99543	0.999161	0.13911	0.991133
3983	1.22908	1.10848	1.17176	1.30894	1.20456	0.0852509	0.0172167
3987	1.11977	0.882043	0.997243	1.08397	1.02076	0.105819	0.721056
3988	0.681452	0.755965	0.792105	0.55397	0.695873	0.105224	0.0102953
3989	1.15647	0.76252	0.847552	0.774914	0.885365	0.18459	0.302469
3991	1.52821	1.03412	1.52905	0.815898	1.22682	0.359706	0.296416
3994	1.32685	1.06942	1.51217	0.993852	1.22557	0.23838	0.154762
3998	0.815501	0.990829	0.798088	0.4358	0.760054	0.233037	0.131585
3999	1.02459	0.702124	1.0542	0.666409	0.861831	0.205907	0.272111
4000	0.84516	0.847195	1.95938	0.891514	1.13581	0.549461	0.654995
4001	1.12501	0.760011	0.788603	0.659721	0.833335	0.202148	0.197721
4002	2.07075	1.19997	1.12787	0.735706	1.28357	0.563037	0.387993
4003	0.833627	1.00882	1.36907	1.05711	1.06716	0.223003	0.589466
4004	1.17045	1.57537	1.40132	1.59844	1.43639	0.197933	0.0216377
4007	1.1302	0.819167	0.773435	0.756462	0.869816	0.175598	0.234768
4009	0.92717	0.938598	1.29415	0.823882	0.995951	0.205388	0.971026
4010	1.32458	0.959571	0.893366	1.18154	1.08976	0.199235	0.433955
4011	1.22943	1.07379	1.1181	1.00137	1.10567	0.0955103	0.113804
4014	1.02987	1.10255	0.96159	1.67832	1.19308	0.32857	0.324668
4015	1.23053	1.06874	1.21221	0.836563	1.08701	0.181963	0.409442
4016	0.959594	1.0111	1.07771	0.992672	1.01027	0.0497549	0.707484
4017	0.832566	1.10962	1.63471	1.1218	1.17468	0.334515	0.373066
4021	1.198	1.12226	1.1481	0.90874	1.09427	0.127621	0.236081
4023	1.15526	0.886408	0.831824	0.91542	0.947228	0.142953	0.513841
4024	1.1213	0.854023	1.26201	0.642655	0.969998	0.276146	0.84192
4025	1.11932	0.883851	0.851415	0.97383	0.957105	0.119904	0.525964
4026	0.85739	1.08638	1.24922	0.970339	1.04083	0.167452	0.659191
4027	0.85739	1.08638	1.24922	0.970339	1.04083	0.167452	0.659191
4028	0.895778	1.22349	1.09629	1.57321	1.19719	0.284672	0.259962
4029	1.05174	1.06263	0.969353	1.03523	1.02974	0.0418029	0.249963
4030	1.14115	0.987992	1.09697	0.916496	1.03565	0.10224	0.53573
4031	0.976855	1.17684	1.69848	0.853478	1.17641	0.372678	0.413616
4032	1.21576	1.04058	1.09446	1.17713	1.13198	0.0792031	0.0446301
4033	0.658503	0.496983	0.612618	0.261422	0.507382	0.177498	0.0115312
4034	1.06402	0.85168	1.09918	0.968802	0.995921	0.110816	0.945943
4035	1.05174	0.90574	1.02788	0.847711	0.958269	0.0975804	0.455253
4036	1.00411	0.777463	0.908474	1.04356	0.933402	0.118424	0.342568
4037	1.01892	0.949588	0.986681	1.01945	0.993657	0.0331347	0.727359
4043	0.927385	1.28622	1.00424	1.03495	1.0632	0.155413	0.475593
4044	1.15348	1.03126	1.13925	1.11744	1.11036	0.0547773	0.0274778
4045	0.914056	0.784381	0.892294	0.783669	0.8436	0.0693634	0.0203735
4048	1.02852	0.982083	0.915114	1.01076	0.984119	0.0498228	0.569118
4051	1.33252	1.97264	0.743273	3.02264	1.76777	0.975652	0.213585
4054	0.752349	0.870763	0.688307	0.754891	0.766578	0.0759819	0.00867251
4058	1.22765	1.92562	1.82949	2.21842	1.80029	0.416058	0.0310023
4060	1.29899	0.82936	1.03467	0.760944	0.980992	0.241811	0.885062
4062	0.743061	0.791375	1.10745	0.795577	0.859365	0.167096	0.190909
4065	1.24192	0.911038	0.850232	1.07456	1.01944	0.17599	0.83936
4066	1.10916	1.08567	1.23085	1.02525	1.11273	0.0863151	0.0795388
4069	1.19728	1.2402	0.681024	1.59811	1.17915	0.377585	0.412656
4074	1.04513	1.26113	1.41462	1.53209	1.31325	0.210374	0.058691
4075	0.829667	1.09596	1.93914	1.6875	1.38807	0.513316	0.227723
4076	1.14292	1.03059	1.21037	0.928301	1.07804	0.124358	0.298291
4084	0.705301	1.96773	1.17338	1.31617	1.29064	0.521368	0.346154
4088	0.922892	0.881663	1.03022	0.842796	0.919393	0.0808	0.139973
4089	0.637378	1.08468	0.783782	1.17134	0.919295	0.250811	0.565677
4098	1.24195	0.713881	0.909416	0.656773	0.880505	0.264133	0.432266
4102	0.821049	0.716745	0.749716	0.799832	0.771836	0.0473639	0.00237349
4103	1.10989	0.933963	0.856662	0.766112	0.916655	0.145945	0.336298
4104	1.18682	0.983233	1.07914	0.902329	1.03788	0.122809	0.580948
4112	0.847636	1.65165	0.988064	2.08	1.39184	0.577423	0.267803
4114	1.20702	1.05162	1.22115	1.03026	1.12751	0.100515	0.0848878
4115	1.12077	1.04155	1.02659	1.10478	1.07342	0.0463091	0.0504425
4118	1.34105	1.08009	1.55234	0.626896	1.15009	0.398707	0.506206
4119	1.24195	0.713881	0.909416	0.656773	0.880505	0.264133	0.432266
4124	1.75837	1.27164	1.22732	1.00584	1.31579	0.317132	0.140472
4125	1.03872	0.935673	0.643433	0.835239	0.863267	0.168463	0.202983
4127	0.441065	1.34748	0.644192	1.55336	0.996524	0.537248	0.990488
4132	1.15798	1.37945	1.18645	1.46183	1.29643	0.147774	0.0277914
4133	1.03832	2.51344	1.30617	1.35361	1.55289	0.655242	0.190077
4135	1.04786	1.22755	1.11286	0.952481	1.08519	0.115523	0.236714
4136	1.35188	0.58379	0.878569	0.43439	0.812157	0.404381	0.421397
4140	2.20115	1.37885	0.409742	1.81175	1.45037	0.770778	0.326973
4141	1.21404	1.14414	1.23123	0.740633	1.08251	0.23101	0.526577
4147	1.18917	0.700704	0.948839	0.811126	0.912461	0.210557	0.466686
4150	1.033	2.9263	0.831466	2.42084	1.8029	1.02961	0.21675
4151	1.31561	0.996412	0.951616	1.1243	1.09698	0.163083	0.319853
4158	1.23181	1.15578	1.21934	1.04527	1.16305	0.0852843	0.0314961
4161	0.946995	1.13946	1.11115	0.982041	1.04491	0.0946334	0.412571
4162	0.705301	1.96773	1.17338	1.31617	1.29064	0.521368	0.346154
4163	1.30091	0.825343	1.59195	0.871663	1.14747	0.365578	0.478836
4164	1.13891	0.870852	1.18214	0.625943	0.954461	0.258697	0.748068
4165	1.32754	1.45503	1.25131	0.63652	1.1676	0.363892	0.424904
4166	1.04885	1.14187	1.44434	0.931888	1.14174	0.219264	0.286631
4170	1.25921	1.20302	1.17017	1.10166	1.18352	0.0657966	0.0113731
4172	1.08701	0.927579	1.14344	1.10965	1.06692	0.0957427	0.256574
4175	1.07641	1.57516	1.7241	1.66798	1.51091	0.296108	0.0409113
4176	0.576304	0.674044	1.50667	0.692274	0.862324	0.432574	0.569667
4183	1.06324	1.02628	1.31834	0.906875	1.07868	0.173146	0.430424
4184	0.93532	1.18435	0.804363	1.4959	1.10498	0.304561	0.540108
4191	0.772125	0.796284	1.05939	0.719805	0.836901	0.151722	0.120711
4192	1.17327	1.04266	1.30113	0.902677	1.10493	0.171221	0.307751
4198	0.979626	0.796435	0.789699	1.0605	0.906565	0.135179	0.260792
4199	1.05038	1.102	1.29795	0.960883	1.10281	0.142564	0.244918
4202	1.46873	1.08075	0.777787	0.935103	1.06559	0.295867	0.687507
4203	0.979626	0.796435	0.789699	1.0605	0.906565	0.135179	0.260792
4206	1.00553	0.830911	1.05454	0.821345	0.928081	0.119478	0.314961
4207	1.02476	0.994196	1.1231	0.994153	1.03405	0.0610932	0.346203
4212	1.95128	1.51181	0.802472	2.099	1.59114	0.581924	0.135126
4219	2.20115	1.37885	0.409742	1.81175	1.45037	0.770778	0.327035
4224	0.746325	1.20646	2.1495	0.87537	1.24442	0.633749	0.496694
4231	1.07599	1.00053	1.32019	0.873795	1.06762	0.187908	0.523684
4233	0.998204	1.34868	0.841481	2.38091	1.39232	0.692331	0.339457
4234	1.70167	2.37885	0.409742	1.81175	1.5755	0.831884	0.260455
4235	1.86298	1.9026	0.822393	1.4416	1.50739	0.502056	0.136491
4237	1.5504	1.26156	1.31342	0.798969	1.23109	0.314322	0.237812
4239	0.607536	0.531857	0.548815	0.530494	0.554675	0.0362125	0.000147348
4244	1.30395	1.13174	1.05089	1.29576	1.19559	0.12489	0.0519784
4249	1.0048	1.05981	1.36736	0.782086	1.05351	0.241237	0.687339
4250	1.20859	0.936335	0.762844	1.02762	0.983846	0.185763	0.873
4252	1.09892	1.003	1.5567	0.857592	1.12905	0.301868	0.45539
4253	0.913798	0.887154	1.52926	0.847921	1.04453	0.324283	0.801406
4254	0.975503	0.575796	1.23965	0.471153	0.815526	0.356622	0.376956
4255	1.09671	0.992644	0.779923	1.26113	1.0326	0.201475	0.76747
4259	0.83698	0.954424	1.34589	0.93913	1.01911	0.224009	0.8754
4267	0.978626	0.774175	0.82587	1.02614	0.901203	0.120299	0.199025
4270	0.85752	0.6357	0.836144	0.68505	0.753603	0.109867	0.0206707
4274	1.05181	1.17967	1.23816	0.858728	1.08209	0.168015	0.400534
4275	0.801921	0.703973	0.769909	0.918249	0.798513	0.0896369	0.020544
4276	1.29699	0.964887	1.02541	1.10473	1.098	0.144489	0.267984
4279	1.06626	0.960454	1.36485	1.35538	1.18674	0.204844	0.16579
4281	1.29899	0.82936	1.03467	0.760944	0.980992	0.241811	0.885062
4282	1.03887	1.02477	1.06443	1.05756	1.04641	0.0180184	0.0141833
4287	1.20266	1.00446	0.966464	1.01696	1.04764	0.105557	0.43328
4289	0.591937	1.53611	1.47191	1.77266	1.34315	0.517239	0.276507
4292	1.09502	0.837632	0.735484	0.960841	0.907245	0.155436	0.318457
4294	1.34257	0.918584	0.718321	0.939076	0.979638	0.261648	0.886195
4295	1.34672	0.76477	1.19467	1.06066	1.0917	0.247309	0.512098
4302	1.51991	1.39156	1.2191	1.01898	1.28739	0.217273	0.0772973
4304	1.16796	0.996837	1.14044	0.948751	1.0635	0.10715	0.321267
4306	0.393333	0.381717	0.459479	0.284468	0.379749	0.0721657	0.000428948
4309	0.823986	1.13608	1.48467	1.44325	1.222	0.307541	0.244547
4312	0.996247	1.10749	1.49286	1.00031	1.14923	0.234808	0.293314
4314	0.907611	0.735701	1.05621	0.630309	0.832457	0.187917	0.17257
4318	1.32281	1.08897	1.50953	1.05076	1.24302	0.214544	0.108382
4323	0.955705	2.4781	1.12479	2.51282	1.76785	0.843118	0.166079
4325	1.06318	0.935009	1.41923	0.858355	1.06895	0.248343	0.617444
4326	1.22606	0.992748	1.01474	0.891513	1.03126	0.140514	0.686467
4332	1.58113	1.27285	0.815128	0.911017	1.14503	0.351247	0.469452
