# Supplementary material for: High-throughput identification of G protein-coupled receptor modulators through affinity mass spectrometry screening
Source: Chem Sci. 2018 Feb 20;9(12):3192–9. doi: 10.1039/c7sc04698g (PMC5916221; doi:10.1039/c7sc04698g)
Supplement: Supplementary file 3 [file SC-009-C7SC04698G-s003.xlsx]

## Sheet: mix-1
Supplementary Table 4. BI measurement of compounds in mix-1 from four individual MS affinity assays
Hits are in bold red with mean BI >2.0 and p <0.05
Cpd ID	BI-1	BI-2	BI-3	BI-4	Mean	s.d.	p-value
3	1.68675	0.879649	1.22381	1.64081	1.35775	0.380738	0.156808
13	0.904882	1.09464	0.632392	0.903311	0.883806	0.190161	0.308948
18	0.734246	1.03942	1.00826	0.931211	0.928285	0.137121	0.372412
19	0.990577	1.03084	0.876698	0.949627	0.961935	0.0657905	0.330982
22	0.880645	1.02586	0.912214	1.22813	1.01171	0.157178	0.890996
23	0.804896	0.863406	0.73971	0.926659	0.833668	0.0799741	0.0252691
25	0.841217	0.834921	0.645572	0.983912	0.826406	0.138805	0.087609
37	1.30942	1.99206	1.04971	1.44669	1.44947	0.397424	0.108735
39	1.61827	2.1999	0.996015	1.81428	1.65712	0.502621	0.0793584
42	1.06265	0.846893	0.837082	1.01891	0.941383	0.116223	0.387423
48	0.723198	0.77477	0.861604	0.740314	0.774972	0.0616086	0.00529719
50	1.1708	1.04549	0.944792	1.04067	1.05044	0.0926796	0.35602
51	1.72073	1.83322	1.55579	2.85857	1.99208	0.588791	0.0434149
55	0.931884	1.09543	0.617725	0.927539	0.893145	0.199549	0.362685
61	1.14817	1.36521	0.924373	1.3638	1.20039	0.210381	0.152874
64	1.49493	0.80364	1.66525	1.40592	1.34244	0.374965	0.165247
66	0.899052	1.06974	0.79065	1.0238	0.945812	0.126099	0.453288
68	0.952442	1.08844	0.744955	0.851606	0.909361	0.14639	0.303664
70	1.06408	0.95184	0.740656	0.857215	0.903447	0.137577	0.255035
72	1.13901	1.30062	1.34307	1.49671	1.31985	0.147073	0.0224444
73	1.47287	1.32166	2.25879	2.95157	2.00122	0.755085	0.0768661
75	0.92172	1.07049	0.923597	1.09788	1.00342	0.0939282	0.946505
80	2.10729	1.04322	2.92579	1.65357	1.93246	0.792842	0.100105
81	1.01944	0.848553	0.885321	1.01519	0.942124	0.0881242	0.280437
87	0.972525	0.872222	0.875479	0.891355	0.902895	0.0471666	0.025957
90	1.82534	0.951326	2.14676	1.03919	1.49065	0.587987	0.193724
96	1.28199	0.872434	1.07114	1.26116	1.12168	0.191338	0.293057
99	1.04594	0.790073	1.01133	0.757733	0.901268	0.148334	0.275241
107	0.863896	1.08899	0.777313	0.913787	0.910997	0.131377	0.268444
108	0.985626	0.995606	0.742662	1.01293	0.934206	0.128193	0.380193
112	0.960088	0.642563	1.18832	0.817288	0.902066	0.230824	0.458469
116	1.09345	0.814972	0.917419	1.02821	0.963512	0.122824	0.594232
119	1.01323	1.01174	0.827215	0.933763	0.946488	0.0877514	0.309747
120	0.976611	1.05158	0.657101	0.804485	0.872445	0.176949	0.245048
124	1.13679	0.67429	1.17907	0.805102	0.948811	0.247902	0.707367
130	1.57333	1.81934	1.32405	1.82331	1.63501	0.238002	0.0128656
133	1.10457	0.715224	1.11418	0.965957	0.974983	0.185943	0.805313
134	1.15953	1.36356	0.784676	1.29552	1.15082	0.258413	0.327439
137	0.822674	1.17671	0.778307	0.599125	0.844205	0.241821	0.287944
147	0.867629	0.861703	0.755752	0.847371	0.833114	0.0522711	0.00777731
156	1.54586	1.04478	2.35331	1.91409	1.71451	0.555243	0.0822297
157	0.888502	0.888274	0.719726	0.909959	0.851615	0.0885122	0.0439653
158	0.987447	1.1852	0.722481	0.796194	0.922831	0.207517	0.510988
159	1.53016	0.677052	1.68459	1.55977	1.36289	0.462099	0.214298
160	1.53016	0.677052	1.68459	1.55977	1.36289	0.462099	0.214298
161	1.12069	1.17596	0.882787	1.15275	1.08304	0.135414	0.307487
165	1.2007	0.938263	1.22707	0.979374	1.08635	0.148606	0.329227
167	1.16331	1.05039	0.99259	1.19963	1.10148	0.0964751	0.126117
168	0.733625	0.898074	0.729037	0.843816	0.801138	0.0836154	0.0176386
169	1.07475	1.21042	0.898873	0.944675	1.03218	0.140249	0.677519
170	1.16011	0.521967	0.682755	0.84052	0.801338	0.272251	0.240557
173	1.3294	1.32259	2.04012	0.929932	1.40551	0.462448	0.177752
174	0.863411	0.853167	0.722455	0.966875	0.851477	0.100181	0.0593011
192	0.927291	1.10156	0.982585	1.1176	1.03226	0.0923241	0.534969
196	0.980472	1.06803	0.697894	1.09093	0.959333	0.180675	0.683129
203	1.05367	0.818972	0.892839	0.850835	0.90408	0.104216	0.162908
205	1.0685	0.800724	0.85073	0.831408	0.88784	0.122185	0.163702
207	1.00278	0.920252	0.740848	0.931753	0.898909	0.111516	0.16748
210	2.46686	1.54731	3.39823	2.94109	2.58837	0.79138	0.0277501
213	1.2058	1.18232	1.02598	1.21689	1.15775	0.0890226	0.0382539
217	1.59915	2.01775	0.980463	1.62434	1.55543	0.428558	0.0809291
219	1.2031	1.01086	1.23799	0.757472	1.05236	0.220501	0.667297
225	2.25796	0.970134	2.41935	2.09521	1.93566	0.657148	0.0652349
226	1.05134	0.803842	0.774401	0.967935	0.899381	0.132338	0.225688
227	1.47514	0.758843	1.56236	1.63532	1.35792	0.404714	0.175089
228	0.980473	1.00338	0.652407	0.817498	0.863439	0.163223	0.192861
230	1.1362	0.8544	1.09662	0.999667	1.02172	0.12543	0.751946
231	1.25583	0.90267	1.07322	1.27357	1.12632	0.174447	0.243378
232	0.878068	0.946192	0.734251	1.03378	0.898072	0.12645	0.205322
236	1.68886	0.702553	1.75508	1.0093	1.28895	0.516161	0.344439
244	0.919362	1.03274	0.732874	0.81499	0.874992	0.129937	0.150026
248	0.879042	0.914559	1.22287	0.679309	0.923946	0.224581	0.546772
255	1.63441	2.60169	0.833105	1.51547	1.64617	0.728314	0.174091
256	0.883255	0.859124	0.733002	0.951036	0.856604	0.0911254	0.051376
265	0.661441	0.721582	0.645634	0.930362	0.739755	0.131216	0.028628
266	1.20275	0.612509	1.18052	0.654876	0.912663	0.322719	0.62594
267	1.18855	0.683729	1.44533	0.855803	1.04336	0.340185	0.815281
270	0.943537	1.13805	0.910207	0.699963	0.922939	0.179423	0.45351
278	0.887975	0.85825	0.952865	0.872938	0.893007	0.0417099	0.014342
283	1.00693	1.13567	0.750351	0.911907	0.951216	0.162296	0.590112
286	0.875568	1.00538	0.814792	0.91307	0.902202	0.0798191	0.0916395
291	1.89706	1.84783	2.56943	1.1166	1.85773	0.5937	0.0630414
292	2.00384	1.50069	1.95701	1.98953	1.86277	0.242181	0.00569042
294	0.933358	0.809237	0.859502	0.805666	0.851941	0.0595845	0.0156507
299	1.45766	1.719	1.07995	1.61504	1.46791	0.280065	0.0443393
306	1.10581	1.18545	0.829783	1.02784	1.03722	0.152529	0.658965
307	0.948824	0.759769	0.816946	0.743346	0.817221	0.0932338	0.0295082
311	1.19544	1.32147	0.826436	1.15945	1.1257	0.211256	0.319634
314	0.963979	0.86195	0.667729	0.738769	0.808107	0.131287	0.0613339
316	0.947989	1.28884	0.922176	0.716903	0.968978	0.236986	0.810416
318	0.90109	0.97513	0.760924	0.858605	0.873937	0.0894134	0.0667511
320	1.19614	1.13034	0.798418	1.14504	1.06748	0.18158	0.511221
322	0.713079	1.07787	1.38382	1.25054	1.10633	0.290547	0.517214
323	1.00955	0.745989	1.4489	1.11565	1.08002	0.29091	0.620525
324	1.54656	2.17441	1.08266	1.72405	1.63192	0.451573	0.0679233
325	0.976687	0.811958	0.886573	1.06249	0.934426	0.108741	0.314234
327	0.987905	0.731153	0.899164	0.850736	0.86724	0.107038	0.08922
328	0.845652	1.15339	0.999324	1.0621	1.01512	0.129479	0.830412
333	1.86305	1.52423	1.48762	1.20916	1.52102	0.267935	0.0301389
337	1.0464	0.881185	0.813874	1.31288	1.01358	0.222163	0.910405
338	1.2133	1.36098	1.97384	1.18606	1.43354	0.3683	0.0999155
346	1.33579	1.39833	1.29653	1.2119	1.31064	0.0780401	0.00413461
349	1.06404	0.718419	0.931374	0.891957	0.901447	0.142502	0.260573
352	1.06933	0.938284	0.800133	1.08161	0.972339	0.131861	0.703052
358	0.924356	1.16133	2.07067	0.930362	1.27168	0.543965	0.391463
361	1.04065	1.23943	0.564372	1.16912	1.00339	0.304031	0.983592
363	1.04065	1.23943	0.564372	1.16912	1.00339	0.304031	0.983592
364	1.12852	0.964319	1.1312	0.943513	1.04189	0.10194	0.471422
374	0.980578	1.36813	0.389557	0.582446	0.830179	0.434946	0.491824
383	1.1174	0.721755	1.18191	1.08097	1.02551	0.206758	0.821023
394	0.987805	0.799495	0.83847	0.989641	0.903853	0.099286	0.148179
402	1.29238	1.51545	0.82449	1.71792	1.33756	0.383666	0.176698
404	0.663849	0.52336	0.988867	0.808176	0.746063	0.199305	0.084073
407	1.21236	0.89585	0.417846	0.884246	0.852575	0.327267	0.43402
409	1.48987	1.75104	1.19078	1.55948	1.49779	0.232565	0.0234159
415	0.938072	0.760135	0.792691	0.81047	0.825342	0.0779902	0.0207499
416	0.978944	1.18365	0.738675	0.983057	0.971082	0.182029	0.771521
417	0.974767	0.882619	0.765329	0.969406	0.89803	0.0980308	0.128958
418	0.900118	0.969036	0.690801	0.896017	0.863993	0.120222	0.108664
425	0.90994	0.772882	0.912248	0.778554	0.843406	0.0781994	0.0279173
430	0.765425	0.886185	1.29621	0.700635	0.912113	0.267359	0.557836
431	0.795455	1.22782	0.917827	0.798426	0.934883	0.203442	0.567612
437	1.22814	1.82765	1.01973	1.41715	1.37317	0.343725	0.11831
439	0.994125	0.826509	0.823836	0.819064	0.865884	0.0855497	0.0518479
446	0.814556	0.748141	0.838045	0.955489	0.839058	0.0864553	0.0337343
452	1.03103	2.74386	3.04825	1.32799	2.03778	1.00614	0.131131
459	2.09651	1.90649	1.35273	1.37554	1.68282	0.376186	0.0359879
462	2.35959	3.56456	2.21834	3.4861	2.90715	0.716859	0.0129685
464	0.949251	1.03562	0.712747	0.824229	0.880461	0.141533	0.189762

## Sheet: mix-2
Supplementary Table 4. BI measurement of compounds in mix-2 from four individual MS affinity assays
Hits are in bold red with mean BI >2.0 and p <0.05
Cpd ID	BI-1	BI-2	BI-3	BI-4	Mean	s.d.	p-value
488	1.12598	1.28968	2.47101	1.20075	1.52185	0.636301	0.199482
491	1.17001	1.73948	0.985593	0.785941	1.17026	0.410617	0.467769
492	1.19274	0.745569	1.14892	1.4325	1.12993	0.284948	0.429031
500	0.848098	0.830956	1.21707	0.920769	0.954224	0.179505	0.645189
502	1.06199	1.13349	0.845061	0.986893	1.00686	0.123359	0.91848
503	0.901122	0.77376	1.02173	0.875731	0.893086	0.101905	0.12677
507	0.968339	0.584176	0.577115	0.65886	0.697122	0.184554	0.046347
510	1.02847	1.06	0.653237	0.901565	0.910818	0.18487	0.405809
511	0.765987	0.691606	1.29954	1.04472	0.950464	0.277956	0.745115
524	1.32909	0.986545	1.41075	1.52945	1.31396	0.233263	0.0742944
528	0.964711	1.13563	1.07167	0.996463	1.04212	0.0767976	0.352853
539	0.925447	0.935299	0.792095	1.07489	0.931933	0.115534	0.323627
548	0.808008	0.610576	1.02578	1.19026	0.908657	0.252983	0.522415
558	0.89357	1.01526	0.806911	1.02202	0.934439	0.103497	0.294604
559	0.786034	0.737205	0.789518	0.672997	0.746439	0.0544749	0.00262403
566	1.18533	0.88634	0.940241	1.15842	1.04258	0.151306	0.612844
567	0.720764	0.887518	0.733544	1.0268	0.842156	0.144548	0.116912
569	1.30574	1.13379	1.67799	1.74938	1.46672	0.29512	0.0507566
570	0.969928	0.736829	0.853551	0.752148	0.828114	0.107799	0.0497489
580	0.925227	0.87853	0.692027	1.17751	0.918324	0.200016	0.473924
581	0.848176	0.745272	0.784415	0.944552	0.830604	0.0870019	0.0300394
586	0.996159	0.917976	1.46523	1.97488	1.33856	0.488219	0.259551
593	0.84474	1.07744	0.566504	0.879266	0.841987	0.210338	0.229993
595	0.840414	0.711236	0.538137	0.869913	0.739925	0.151147	0.0411956
597	0.817605	0.868175	0.698659	0.86819	0.813157	0.0799688	0.0185087
599	0.954561	0.970432	0.544644	0.895232	0.841217	0.200347	0.211126
602	1.28962	0.62929	1.04053	1.18817	1.0369	0.290349	0.815771
613	1.02473	0.848779	0.825684	0.874685	0.89347	0.089767	0.0981937
614	1.02712	0.826245	0.769253	1.18095	0.950894	0.189094	0.639381
615	0.887672	0.897308	0.625799	0.981687	0.848116	0.154111	0.143294
620	0.977164	0.834182	0.656493	0.98012	0.86199	0.152995	0.168982
622	0.902491	0.726779	0.965582	1.22817	0.955756	0.207825	0.698965
623	1.18607	1.06882	0.84681	1.11767	1.05484	0.146787	0.509163
626	0.662917	1.08487	0.98999	1.11092	0.962173	0.206161	0.738004
627	0.862185	1.02297	1.13469	1.21718	1.05926	0.153605	0.496587
641	0.802407	1.12236	1.57913	0.82609	1.0825	0.361678	0.679247
649	1.6884	2.18	2.23792	2.47195	2.14457	0.329261	0.00610435
650	0.962781	0.879492	0.70947	1.03628	0.897007	0.140477	0.23882
653	1.16988	0.927211	0.92819	1.07355	1.02471	0.118719	0.705218
660	1.26473	0.880724	1.18302	1.305	1.15837	0.191928	0.197445
664	1.20351	1.45385	0.834107	0.980641	1.11803	0.270538	0.447127
665	0.98261	0.903039	0.603328	0.893682	0.845665	0.166412	0.160648
666	1.0367	0.801605	1.0274	1.02832	0.973503	0.114675	0.675447
668	1.05485	0.938268	0.942319	1.06317	0.99965	0.0686433	0.992505
672	1.15999	1.03745	1.01177	1.01994	1.05729	0.0693028	0.196845
674	1.02024	1.09342	0.640573	0.908281	0.91563	0.198549	0.457843
681	1.15315	1.88888	2.32092	2.17393	1.88422	0.519333	0.0422988
682	1.22487	0.857176	1.22089	1.37177	1.16868	0.219214	0.221449
683	1.10034	0.646641	1.24144	1.08682	1.01881	0.257776	0.893224
685	0.799753	0.771958	0.618154	0.889346	0.769803	0.112827	0.026581
690	0.737372	1.01811	0.855763	0.708855	0.830025	0.140601	0.0943526
693	1.35033	1.05687	1.56388	1.58646	1.38939	0.245888	0.0505906
707	1.53337	0.722462	1.56638	1.38361	1.30145	0.394103	0.223545
717	1.12168	0.928799	0.793212	1.06078	0.97612	0.146118	0.765249
723	0.810736	0.779973	0.527863	0.751817	0.717597	0.128758	0.0219419
726	1.0961	0.923282	0.879716	1.1603	1.01485	0.134664	0.839609
730	2.06423	0.879001	3.21157	1.91728	2.01802	0.954674	0.122696
735	1.12781	0.800747	1.05826	0.961424	0.98706	0.141715	0.866736
736	1.47905	1.59523	1.12683	1.30234	1.37586	0.205097	0.0351169
740	1.31736	1.44385	1.52897	1.65169	1.48547	0.14085	0.0062548
742	1.19411	0.817958	0.795525	0.933214	0.935203	0.182844	0.52958
743	1.1085	1.17275	0.981337	1.32323	1.14645	0.14218	0.131482
744	1.59988	1.41251	1.18075	1.21742	1.35264	0.193686	0.0357077
752	0.945093	0.865995	0.831022	1.22709	0.967299	0.179645	0.739957
753	1.18534	0.884274	0.880976	0.91445	0.966261	0.146829	0.677079
766	1.09938	1.13942	0.78134	0.809246	0.957348	0.188182	0.681108
768	1.0363	1.13453	0.928526	0.956499	1.01396	0.0924413	0.782309
771	0.880059	1.06377	0.994107	1.48807	1.1065	0.265412	0.480931
772	0.942121	1.23968	0.811051	0.769798	0.940662	0.21245	0.615412
778	3.20995	2.32732	4.17204	3.04543	3.18868	0.759366	0.010376
779	0.556968	0.857092	0.530671	0.708576	0.663327	0.151109	0.021038
784	1.22736	1.06337	0.558264	1.41556	1.06614	0.367889	0.743009
789	0.936155	0.883717	0.685448	0.858462	0.840945	0.108598	0.0610385
790	0.973998	0.831286	0.869019	1.04361	0.929478	0.0971341	0.242414
791	0.841467	1.2495	1.4906	0.76538	1.08674	0.343037	0.647886
796	1.0897	0.994974	1.06541	1.33733	1.12185	0.14916	0.200801
797	1.11133	0.930828	1.0882	1.43073	1.14027	0.209586	0.273117
798	0.904488	1.10825	0.648468	1.04354	0.926187	0.20373	0.521086
799	0.919722	1.01958	1.16331	0.69577	0.949595	0.196546	0.643393
800	0.89572	0.999914	0.500935	0.816214	0.803196	0.215089	0.164673
802	1.03997	1.06659	0.8652	0.776752	0.937128	0.139321	0.433289
805	0.87379	0.957127	0.683182	0.892573	0.851668	0.117858	0.0863945
806	0.991392	1.75799	1.22905	0.562617	1.13526	0.498401	0.625004
812	1.37814	1.1713	1.08426	1.50133	1.28376	0.190344	0.0585259
814	1.68832	1.1968	1.52688	1.9694	1.59535	0.322532	0.0344753
820	0.857841	0.819007	0.651701	0.944451	0.81825	0.122792	0.0595298
821	0.883068	0.90723	0.644623	0.973217	0.852034	0.143428	0.131083
822	0.981607	1.17637	0.723766	1.00222	0.970989	0.186536	0.776121
826	1.20303	1.00153	0.92722	0.923606	1.01385	0.131134	0.846275
831	0.977489	1.15094	0.994936	0.979024	1.0256	0.0839348	0.584991
833	0.99605	0.653839	0.71072	0.89039	0.81275	0.158419	0.099042
835	1.05396	0.912199	1.03838	1.44364	1.11204	0.229995	0.401759
836	0.897399	0.755696	0.561605	1.56002	0.94368	0.433334	0.81173
838	1.57716	2.04173	1.2589	0.636568	1.37859	0.589946	0.289485
841	1.13782	1.06347	0.751507	0.965969	0.979692	0.167612	0.824154
844	1.48483	0.691026	1.50252	0.851456	1.13246	0.42227	0.574924
845	1.25513	1.34445	1.40562	1.53508	1.38507	0.117556	0.0072313
846	0.928597	0.958109	0.869867	0.943805	0.925094	0.03874	0.0305868
858	1.25904	1.12675	0.908468	1.08353	1.09445	0.144733	0.282929
859	1.00218	0.913866	0.816191	0.897679	0.90748	0.076243	0.0935817
860	1.93503	1.97497	2.28021	1.31472	1.87623	0.404847	0.0227339
863	0.995562	0.878933	0.99451	0.811711	0.920179	0.0906905	0.176583
864	1.30653	0.564865	1.29744	1.63356	1.2006	0.451743	0.439898
865	0.79415	0.630071	0.547948	0.921534	0.723426	0.167089	0.0453749
866	0.930654	0.814065	0.713354	0.948641	0.851678	0.109829	0.0737265
869	1.23125	1.13525	1.04617	0.890948	1.0759	0.144622	0.37096
872	1.93111	1.87211	1.12805	1.34668	1.56949	0.394489	0.063156
882	0.730922	0.740211	0.587726	0.697644	0.689126	0.0700265	0.00301252
884	0.886972	0.804466	0.570315	1.03955	0.825326	0.195925	0.172585
896	0.958137	0.784684	1.17571	1.34312	1.06541	0.24468	0.629957
897	0.862361	0.932363	0.574542	1.15051	0.879944	0.237721	0.386864
901	1.76907	2.63015	1.99516	2.34309	2.18437	0.379555	0.00829834
903	1.43411	0.904104	0.645001	0.832645	0.953965	0.338232	0.80312
909	1.77852	0.448931	1.90194	1.61327	1.43566	0.668368	0.283367
914	1.0189	1.2602	1.21326	1.49084	1.2458	0.193901	0.0850274
915	0.883068	0.90723	0.644623	0.973217	0.852034	0.143428	0.131083
916	1.10552	0.942986	0.645275	0.858417	0.888049	0.191598	0.32698
917	1.13799	0.774868	0.773952	1.00413	0.922735	0.179778	0.453235
918	1.16515	0.952658	0.791354	0.935953	0.961279	0.154007	0.64967
922	1.37975	1.81206	1.95069	1.68212	1.70616	0.243673	0.0102191
923	1.09124	0.741513	0.730217	0.875999	0.859742	0.167937	0.193439
925	0.913043	1.18031	1.13372	0.578583	0.951414	0.274533	0.746788
929	1.10135	1.15247	1.08128	0.592181	0.981822	0.261484	0.898228
933	0.955221	0.854921	0.44989	1.30105	0.890271	0.350306	0.575433
934	1.30948	1.38552	1.31205	1.55997	1.39175	0.117555	0.00688558
938	2.0957	1.73496	1.54513	2.41526	1.94776	0.386363	0.0162123
939	1.26459	0.879648	0.903793	0.970051	1.00452	0.17754	0.962595
940	1.71141	1.63925	1.75481	2.08728	1.79819	0.198536	0.00401716
942	0.989459	1.7306	0.998248	1.09409	1.2031	0.354847	0.335374
943	0.913283	0.868995	0.612108	0.788975	0.795841	0.132852	0.0544132
944	0.866561	0.867187	0.668539	1.01173	0.853504	0.140955	0.129173
950	1.04926	1.32772	0.819844	1.05677	1.0634	0.20771	0.584693
951	1.53448	1.11937	1.29991	1.20579	1.28989	0.178954	0.0478583
953	0.966936	1.0467	0.774612	1.02147	0.952429	0.12313	0.495996
958	1.18757	0.884235	1.14824	1.22688	1.11173	0.155026	0.245112
960	0.848176	0.745272	0.784415	0.944552	0.830604	0.0870019	0.0300394

## Sheet: mix-3
Supplementary Table 4. BI measurement of compounds in mix-3 from four individual MS affinity assays
Hits are in bold red with mean BI >2.0 and p <0.05
Cpd ID	BI-1	BI-2	BI-3	BI-4	Mean	s.d.	p-value
961	0.511437	0.908757	0.894841	0.781737	0.774193	0.184175	0.0915088
964	1.10694	1.29005	2.12631	1.55842	1.52043	0.444441	0.101043
965	0.844179	0.771945	1.1516	0.935509	0.925808	0.164735	0.434111
966	1.2541	1.11724	1.1624	1.05037	1.14603	0.085493	0.0419613
970	0.843216	0.95436	1.56329	0.680894	1.01044	0.385294	0.960188
973	1.45541	1.02401	1.41183	1.35089	1.31054	0.19577	0.0503849
978	1.78983	1.24395	1.2522	1.16847	1.36361	0.286634	0.0848927
984	0.972625	0.996499	1.35047	1.35576	1.16884	0.21302	0.211099
989	1.03284	1.0264	1.21174	1.14186	1.10321	0.0896755	0.104807
993	0.982324	0.806236	1.12628	1.15915	1.0185	0.161	0.833037
995	1.15534	1.16921	0.63858	0.961928	0.981265	0.247274	0.889175
996	0.469668	0.748196	0.588466	0.719107	0.631359	0.128237	0.0104527
997	0.994086	0.912777	1.13708	0.746678	0.947655	0.162937	0.566263
1004	1.438	0.888424	0.849809	0.907506	1.02093	0.279075	0.890266
1012	0.507072	0.703031	0.736761	0.712222	0.664771	0.106093	0.00800917
1019	0.877378	0.81629	0.935122	1.07771	0.926624	0.111798	0.280688
1020	0.788954	0.649001	0.877279	0.773318	0.772138	0.0939887	0.0167413
1022	0.704502	0.902956	1.01291	0.904012	0.881096	0.128536	0.161403
1024	0.638097	0.856499	1.4689	0.692931	0.914106	0.381319	0.682911
1025	0.506081	0.760003	0.885448	1.44733	0.899715	0.397722	0.648759
1029	0.692845	0.979566	0.993337	0.705979	0.842932	0.165904	0.154623
1031	0.499801	0.951413	0.924684	0.692888	0.767196	0.212728	0.116392
1034	1.03544	0.640736	0.985246	0.704322	0.841436	0.197821	0.207241
1035	0.476363	0.866106	0.819201	0.80109	0.74069	0.178335	0.0620911
1038	1.35562	0.802629	0.826729	0.762631	0.936903	0.280396	0.683203
1041	1.10763	0.879304	0.93497	0.948125	0.967508	0.0980637	0.554908
1042	1.01095	0.947865	1.02402	1.12618	1.02725	0.0738591	0.514036
1047	1.96301	0.921543	1.19874	1.40093	1.37105	0.440852	0.190896
1050	0.547878	0.638397	0.759401	0.722561	0.667059	0.0942215	0.00582478
1056	0.45394	0.841729	1.10886	0.767563	0.793022	0.269412	0.221999
1058	0.350699	0.82362	1.20792	0.70796	0.77255	0.353216	0.288137
1060	1.08614	0.860668	1.29343	1.18375	1.106	0.184173	0.333127
1063	0.476363	0.866106	0.819201	0.80109	0.74069	0.178335	0.0620911
1064	0.642485	0.784955	0.782003	0.60976	0.704801	0.0918349	0.00762899
1065	0.601727	0.75933	1.01087	0.774651	0.786645	0.168684	0.0854518
1066	0.880644	0.737116	1.16537	0.738959	0.880521	0.201446	0.320926
1068	0.539003	0.837517	0.821128	0.759284	0.739233	0.137672	0.0322615
1070	1.10661	0.670797	0.888317	0.699133	0.841215	0.201564	0.213216
1075	0.161296	1.22645	0.726297	0.990961	0.776251	0.458055	0.400642
1081	1.39454	1.12778	1.9403	0.86631	1.33223	0.45917	0.243674
1088	0.787481	0.869999	0.976789	0.727888	0.840539	0.107916	0.0597701
1091	0.722274	0.851276	0.737376	1.0017	0.828156	0.129234	0.0763766
1092	1.51159	1.14937	1.67812	1.05003	1.34728	0.296635	0.101089
1093	0.646161	0.639565	0.623261	0.703374	0.65309	0.0348769	0.000277593
1098	0.812741	0.963485	0.876824	1.03636	0.922353	0.0979416	0.211018
1099	1.21547	0.745152	1.14553	0.699609	0.95144	0.266681	0.739878
1104	0.997874	0.951599	0.593826	0.852345	0.848911	0.180568	0.192826
1105	0.750832	0.748314	1.09669	0.836734	0.858142	0.164256	0.182569
1108	0.683446	0.863208	0.850704	0.79343	0.797697	0.0820019	0.0159618
1109	1.32408	0.720357	0.578302	0.965866	0.897151	0.326553	0.573464
1111	1.06511	0.703682	0.96971	1.20534	0.985959	0.211609	0.902827
1112	0.668516	0.737895	1.0039	0.871928	0.820561	0.148554	0.0945233
1115	2.15125	1.19732	2.102	1.33332	1.69597	0.50077	0.0690128
1120	1.02921	0.724022	1.01571	1.08643	0.963842	0.162792	0.686968
1129	1.1119	0.743273	0.990416	0.728217	0.89345	0.188835	0.341203
1130	1.11604	0.916053	1.51234	1.18591	1.18259	0.247801	0.237004
1131	0.976585	0.869774	1.08325	1.05967	0.99732	0.0965563	0.959222
1132	0.766498	1.00829	0.895033	0.862383	0.883052	0.0997346	0.100745
1133	1.37598	0.713073	1.25821	0.773247	1.03013	0.33573	0.869007
1140	0.935364	0.78	1.09661	0.795876	0.901964	0.147348	0.275397
1142	0.943069	0.725132	0.542563	0.784713	0.748869	0.165453	0.0560587
1145	0.976429	1.13143	1.29724	1.14873	1.13846	0.131173	0.125241
1148	0.83424	1.01722	1.28757	0.685383	0.956104	0.259324	0.757263
1151	1.99279	1.04571	1.35021	1.39769	1.4466	0.396114	0.109439
1152	0.773104	0.735406	0.951444	0.793175	0.813282	0.0951697	0.0294492
1158	0.952398	0.840583	1.14982	0.767391	0.927548	0.166568	0.448347
1165	0.996082	1.39733	0.88908	0.961398	1.06097	0.228623	0.630759
1177	0.948005	0.674797	1.08276	1.9303	1.15897	0.541505	0.598382
1183	1.16576	0.964061	1.28705	1.11786	1.13369	0.133633	0.13922
1185	1.34388	1.16106	1.63964	1.38855	1.38328	0.197216	0.0301828
1187	0.994971	1.02912	1.03193	0.880589	0.984152	0.0710559	0.685773
1188	0.968483	0.856967	1.18045	0.963822	0.99243	0.135516	0.918104
1189	0.725568	0.81133	1.25263	1.4272	1.05418	0.339357	0.770425
1192	0.639798	0.691152	0.764421	0.768446	0.715954	0.0619658	0.00274396
1193	1.16649	1.29039	1.58982	1.02572	1.2681	0.240188	0.111742
1195	0.939651	0.874678	1.13675	0.903214	0.963574	0.118475	0.582107
1198	0.53673	0.74782	0.76459	0.603952	0.663273	0.110974	0.00898063
1202	0.517172	0.920144	0.980748	0.615203	0.758317	0.226786	0.122851
1207	0.824973	0.900199	1.00046	0.609741	0.833844	0.165797	0.138743
1208	1.33143	0.804799	1.23664	0.430522	0.950846	0.415766	0.828309
1213	0.894481	0.853415	1.04385	0.818725	0.902617	0.0991139	0.144138
1216	0.765264	0.930753	1.24717	0.772861	0.929012	0.225407	0.573489
1229	0.578917	0.899841	1.3575	0.760068	0.899081	0.332653	0.586852
1231	0.726916	0.64904	0.82098	0.699447	0.724096	0.072193	0.00465002
1232	0.78752	0.883829	1.26252	1.20955	1.03585	0.235462	0.780619
1233	1.29626	0.959698	1.15102	1.06808	1.11877	0.141913	0.192766
1235	1.09898	1.20113	1.26123	0.855538	1.10422	0.178805	0.327979
1236	0.899034	0.876775	1.1324	0.711617	0.904957	0.173148	0.352494
1238	1.15364	0.754696	1.04418	0.931925	0.971109	0.170319	0.756775
1240	0.98445	0.707377	0.822014	0.56602	0.769965	0.177223	0.0806546
1242	1.30367	0.403762	1.00504	1.13081	0.960823	0.391031	0.854001
1243	1.515	1.31094	1.43931	1.0648	1.33251	0.197351	0.0434183
1245	1.67642	1.00902	1.01622	1.08928	1.19773	0.321177	0.305933
1248	1.26325	0.69592	1.22156	0.863869	1.01115	0.276216	0.940746
1249	1.27776	1.04609	1.54398	1.49791	1.34144	0.228612	0.0582686
1252	1.75828	1.03077	1.71785	1.33394	1.46021	0.344279	0.075467
1255	0.72942	0.754675	1.23392	0.851553	0.892392	0.233692	0.425001
1257	1.10206	0.748287	0.923579	0.77592	0.887461	0.162448	0.25993
1261	1.12499	1.25259	1.17243	1.01715	1.14179	0.0983751	0.0633924
1266	1.20183	0.816711	0.789115	0.809803	0.904366	0.198658	0.406671
1270	0.78752	0.883829	1.26252	1.20955	1.03585	0.235462	0.780619
1271	0.655033	0.917546	1.11618	0.806334	0.873772	0.194139	0.284352
1272	1.90035	1.44684	1.80376	1.36196	1.62823	0.26373	0.0175623
1274	1.26574	0.965095	0.683479	1.06213	0.994109	0.242034	0.964236
1283	0.490646	0.798705	0.852903	0.733156	0.718853	0.159822	0.0389658
1284	0.650946	0.752429	1.46315	1.31333	1.04496	0.403207	0.837834
1288	0.451277	0.816428	1.02552	0.82451	0.779435	0.239198	0.162357
1292	0.477134	0.784606	0.877749	1.04416	0.795913	0.238099	0.184985
1294	1.25019	0.817706	1.04576	0.735569	0.962306	0.232495	0.767036
1300	0.597793	0.898567	1.22627	0.927572	0.912552	0.25685	0.544765
1305	1.11521	1.05653	1.38744	0.540776	1.02499	0.353537	0.896543
1308	1.69699	0.90127	1.0661	1.60617	1.31763	0.393189	0.204582
1316	0.813272	0.691403	0.946316	0.808629	0.814905	0.104185	0.0380039
1319	0.595631	0.734152	0.73626	0.689302	0.688836	0.0658027	0.00250574
1320	0.798002	0.666558	1.12901	0.940371	0.883484	0.198226	0.324564
1321	0.871975	1.42998	0.969106	0.74939	1.00511	0.29717	0.974709
1323	0.570982	0.804082	1.17069	0.650588	0.799086	0.265958	0.227991
1326	0.753747	0.822732	0.958014	0.631602	0.791523	0.136254	0.0549875
1327	1.35532	1.02657	1.47752	1.40486	1.31607	0.199418	0.0504853
1333	1.18974	0.630507	0.796131	0.784568	0.850237	0.238597	0.29823
1334	1.09291	0.762501	1.05341	0.719795	0.907152	0.193151	0.407274
1335	0.543141	1.09874	1.69335	0.699704	1.00873	0.512861	0.974968
1336	0.929844	0.816042	1.22298	0.761795	0.932665	0.205822	0.559604
1337	0.603714	1.09444	1.36229	1.46035	1.1302	0.383549	0.545875
1338	1.44328	1.19776	1.66298	1.15196	1.36399	0.236833	0.0543976
1338	1.44328	1.19776	1.66298	1.15196	1.36399	0.236833	0.0543976
1340	0.952261	0.89856	0.922049	0.84067	0.903385	0.0472357	0.0264068
1349	0.637626	1.06618	1.02236	0.712661	0.859707	0.216048	0.284852
1351	1.16193	1.19998	1.651	1.1128	1.28143	0.24895	0.108834
1353	1.13906	0.892183	1.01356	1.14515	1.04749	0.119991	0.486451
1356	1.26463	0.409091	2.17148	1.38611	1.30783	0.721485	0.4562
1365	1.19329	0.965417	1.77099	1.15307	1.27069	0.348004	0.217634
1366	0.605223	0.778772	0.83479	0.80267	0.755363	0.102692	0.0175592
1370	0.646546	0.782436	1.02404	1.03763	0.872661	0.19096	0.274527
1374	0.840568	0.583093	0.768243	0.240169	0.608018	0.268133	0.0613079
1375	0.422795	0.673008	0.80359	0.853546	0.688235	0.192635	0.0479657
1377	0.789328	0.706837	0.727587	0.739751	0.740876	0.0350436	0.000670779
1380	0.906429	0.733261	0.930377	0.826753	0.849205	0.089089	0.0429243
1405	0.673681	0.710579	0.724881	0.770599	0.719935	0.0400762	0.000793081
1406	2.09335	1.37334	1.68126	0.851437	1.49985	0.523322	0.152083
1407	0.555832	0.885032	0.966466	0.714531	0.780465	0.182882	0.0958031
1410	0.945076	0.85895	1.21893	0.850906	0.968466	0.172331	0.738671
1412	0.689135	0.808294	0.676667	0.69688	0.717744	0.0609381	0.00266191
1414	0.919745	1.67175	1.3574	1.13839	1.27182	0.320952	0.188868
1419	0.691815	0.712669	0.976624	0.708161	0.772317	0.136499	0.0445183
1428	1.86877	1.04611	0.990529	1.00867	1.22852	0.427462	0.363365
1429	0.782282	0.790981	1.08764	0.809952	0.867714	0.147072	0.169861
1435	0.692216	0.977832	0.945623	0.830501	0.861543	0.129393	0.121841

## Sheet: mix-4
Supplementary Table 4. BI measurement of compounds in mix-4 from four individual MS affinity assays
Hits are in bold red with mean BI >2.0 and p <0.05
Cpd ID	BI-1	BI-2	BI-3	BI-4	Mean	s.d.	p-value
1441	1.14306	1.17492	1.00923	1.07628	1.10087	0.073637	0.0713565
1443	1.61732	1.58891	0.917969	1.66622	1.4476	0.354531	0.0857958
1445	1.07803	1.26309	1.144	1.28807	1.1933	0.0992819	0.0300432
1446	1.10885	1.12618	1.30722	1.23033	1.19315	0.0930672	0.025414
1448	1.20778	0.945786	0.830968	1.0578	1.01058	0.160807	0.903609
1449	1.36444	1.32963	1.16598	1.31107	1.29278	0.0873794	0.00677964
1450	0.952445	1.05828	0.867067	1.1223	1.00002	0.11297	0.999693
1453	1.32377	1.22886	1.25671	1.28975	1.27477	0.0410645	0.000901979
1455	1.10285	1.25457	0.824182	0.98057	1.04054	0.182666	0.687174
1457	1.45847	1.26581	1.29872	1.30698	1.3325	0.0858466	0.00447431
1458	0.997185	1.00348	0.787669	0.943388	0.932931	0.100526	0.274326
1459	1.11947	1.22527	1.08285	1.42133	1.21223	0.151915	0.0681887
1460	1.07718	1.08075	0.8772	1.24217	1.06933	0.149421	0.421888
1463	1.0477	0.731197	1.06448	1.17272	1.00403	0.190137	0.968882
1468	1.50575	1.36712	0.919753	1.14032	1.23324	0.257615	0.167864
1471	1.25734	1.26055	1.10488	1.30192	1.23117	0.0866094	0.0128515
1472	1.38089	1.01461	0.911034	1.18151	1.12201	0.205428	0.320367
1474	0.756472	0.939994	0.96905	1.22679	0.973077	0.193562	0.798939
1475	1.11508	1.19497	1.00714	1.35846	1.16891	0.147959	0.106616
1476	2.4127	1.42002	1.30527	1.20099	1.58474	0.559173	0.127599
1478	1.15523	1.01685	1.01031	1.16872	1.08778	0.0858951	0.133544
1482	1.20663	1.03523	0.841897	1.41601	1.12494	0.244647	0.382242
1490	1.21623	1.10632	0.956039	1.14759	1.10655	0.110103	0.148381
1495	0.925226	0.643862	1.06333	0.593919	0.806584	0.224869	0.183873
1496	0.965632	1.22767	0.796048	1.04551	1.00871	0.179237	0.928665
1497	2.27134	1.68951	1.60463	1.98802	1.88838	0.303672	0.0099522
1498	0.667973	0.685009	0.533428	0.66478	0.637797	0.0701439	0.00193654
1499	1.16718	1.30944	1.08984	1.18594	1.1881	0.0909604	0.0256546
1504	0.830733	0.930751	0.764002	1.15863	0.92103	0.172589	0.427608
1506	1.16831	1.2001	0.765573	1.06732	1.05033	0.198096	0.646382
1508	0.984503	1.3025	0.980687	0.929451	1.04929	0.170667	0.604053
1510	1.02071	0.891293	1.1146	1.06768	1.02357	0.0961542	0.65756
1514	1.19175	0.979842	0.996091	0.946183	1.02847	0.11082	0.64289
1515	1.20996	1.276	1.29261	1.15617	1.23368	0.0628086	0.00502356
1516	0.928512	0.88851	0.764117	0.959574	0.885178	0.0857895	0.0752521
1518	0.932203	1.21978	1.22703	1.56011	1.23478	0.256695	0.16479
1519	1.40392	1.15718	1.11866	1.32785	1.2519	0.136142	0.0342638
1520	1.4083	1.34932	1.00834	1.45893	1.30622	0.203579	0.0572854
1521	1.25482	0.93449	1.38773	1.0142	1.14781	0.210055	0.254038
1526	1.22801	1.22603	0.968174	1.22964	1.16296	0.129867	0.0869624
1527	1.13333	1.34125	1.13084	1.34623	1.23791	0.122219	0.0300572
1529	1.25734	1.26055	1.10488	1.30192	1.23117	0.0866094	0.0128515
1530	1.12533	1.10578	0.634687	0.92937	0.948793	0.227194	0.682735
1532	1.31999	1.21937	1.17832	1.38162	1.27482	0.092796	0.00961495
1533	1.14949	1.16959	0.96757	1.10036	1.09675	0.090897	0.123152
1534	1.29109	1.17918	1.16544	1.45327	1.27224	0.133158	0.0264365
1535	0.865806	1.25137	0.807925	0.945089	0.967547	0.197391	0.763911
1536	1.16595	1.12891	0.984152	1.22802	1.12676	0.10349	0.0917078
1537	1.32399	1.34256	1.29473	1.48524	1.36163	0.0847285	0.00337771
1538	1.63772	1.94159	1.59898	1.89058	1.76722	0.173873	0.00306623
1539	0.984348	1.04952	0.847122	0.85645	0.934359	0.0990624	0.276979
1546	0.910896	0.848021	0.603139	1.62919	0.99781	0.441358	0.992706
1547	1.06185	1.13861	0.92382	0.849185	0.993365	0.130907	0.925655
1548	1.13797	1.09912	0.94442	1.12286	1.07609	0.0892269	0.186623
1550	0.851957	2.81129	1.52625	1.14376	1.58331	0.863957	0.269745
1551	0.67416	1.14605	0.753881	0.670446	0.811134	0.226569	0.194068
1555	1.3452	1.10328	1.49714	1.53731	1.37073	0.19656	0.0326168
1556	0.947827	0.883997	0.857646	0.977093	0.916641	0.0552963	0.0569847
1557	0.864761	1.29634	1.0531	1.35386	1.14202	0.226177	0.298095
1558	1.58609	1.85467	1.49473	1.83447	1.69249	0.179714	0.00454112
1559	3.32977	1.19192	1.57544	1.09579	1.79823	1.04184	0.222962
1563	0.912726	1.06977	0.817674	1.03977	0.959984	0.116767	0.542302
1565	1.33294	1.59915	1.0312	1.54743	1.37768	0.258141	0.0611907
1566	0.915653	1.20836	0.975784	1.3295	1.10732	0.194604	0.350561
1568	1.19286	1.12093	1.00262	1.10077	1.10429	0.0784641	0.0764425
1573	1.31087	1.01798	0.9645	1.56259	1.21399	0.277832	0.221108
1575	1.9949	1.32265	1.51752	1.50606	1.58528	0.287303	0.0266879
1576	0.505502	1.70482	1.591	1.26242	1.26594	0.540544	0.397689
1580	1.16911	1.25547	0.952673	1.29473	1.168	0.152838	0.115349
1582	1.02018	1.09031	1.12085	1.09419	1.08138	0.0430028	0.0323348
1589	1.12236	0.991364	0.944497	1.24687	1.07627	0.136383	0.344841
1591	1.4524	0.89019	1.61887	1.21109	1.29314	0.316526	0.161068
1593	1.15579	1.22597	0.897665	1.18682	1.11656	0.148729	0.215009
1595	1.63594	1.48432	1.09929	1.7221	1.48541	0.27554	0.038824
1598	1.12856	1.10126	0.942177	1.08087	1.06322	0.0830242	0.225172
1601	1.24205	1.36187	0.977046	1.65095	1.30798	0.279522	0.114784
1602	1.07616	1.09866	1.0864	1.1322	1.09835	0.0243643	0.00397007
1605	1.18914	1.32641	1.17038	1.35986	1.26145	0.0956171	0.0120193
1606	1.17127	0.826071	0.914366	0.796216	0.926982	0.170412	0.454465
1611	1.14673	1.10946	0.830967	1.04066	1.03195	0.141011	0.681162
1613	0.94318	1.52278	1.30779	1.28768	1.26536	0.239698	0.113666
1614	1.41206	1.13946	1.06422	1.19675	1.20312	0.149491	0.0727026
1617	1.374	1.60865	1.2811	1.50707	1.4427	0.144359	0.00871549
1618	1.38482	1.67998	1.33328	1.05752	1.3639	0.255049	0.0649188
1620	1.11369	1.37738	0.928418	0.682856	1.02559	0.2935	0.872695
1622	1.20342	1.31173	1.00401	1.67544	1.29865	0.281674	0.12412
1624	1.87454	2.11249	1.72025	1.86482	1.89302	0.162432	0.00161074
1625	1.01571	0.788328	0.784919	1.24008	0.957257	0.217287	0.720302
1626	1.13238	1.00575	0.857382	1.16301	1.03963	0.139269	0.609101
1627	1.12792	1.15474	0.936121	1.14416	1.09073	0.103664	0.178329
1628	1.46458	1.60928	1.18936	1.46779	1.43275	0.175727	0.0160402
1630	0.970308	1.37217	1.14794	1.0893	1.14493	0.168555	0.183985
1633	1.16162	0.991212	0.995523	1.2468	1.09879	0.126614	0.216554
1639	1.09287	1.19853	0.957177	1.45075	1.17483	0.208792	0.192589
1643	1.04799	1.15362	0.820515	0.606962	0.907272	0.243722	0.502041
1646	0.889654	1.06897	0.46139	1.4244	0.961101	0.400455	0.858374
1649	2.06183	2.15107	1.74262	2.19334	2.03722	0.203904	0.0020237
1652	1.44014	1.10786	0.949538	1.61121	1.27719	0.302298	0.164036
1655	1.72305	1.94708	1.62289	1.85639	1.78735	0.143132	0.00160809
1659	1.0788	1.21522	0.94559	1.07127	1.07772	0.110161	0.25307
1665	1.35846	1.27743	1.20046	1.18385	1.25505	0.0800931	0.00783486
1667	1.27549	1.91784	1.08695	1.25268	1.38324	0.366169	0.127382
1673	1.11963	0.982549	2.58603	1.58433	1.56813	0.725819	0.215437
1675	1.17809	1.12962	0.952432	1.12776	1.09697	0.0991381	0.145368
1679	0.983354	1.19187	0.955588	1.06716	1.04949	0.106109	0.419694
1680	1.1493	1.14699	0.918898	1.21859	1.10845	0.13066	0.195502
1681	1.15423	1.16628	0.903977	1.24245	1.11673	0.147118	0.210722
1682	1.5319	2.00495	1.35508	1.4514	1.58583	0.28861	0.0269417
1684	1.58589	1.35382	1.58007	1.19632	1.42902	0.189055	0.0200248
1685	1.1646	1.12136	0.934262	1.52379	1.186	0.246383	0.228226
1686	0.565123	1.21098	0.974555	1.21961	0.992567	0.306749	0.964391
1688	1.25764	1.10363	0.908452	1.97176	1.31037	0.463501	0.272916
1689	1.26476	1.28018	0.902002	1.13246	1.14485	0.174947	0.196317
1690	1.84028	2.04399	1.68533	2.1282	1.92445	0.200058	0.00268034
1695	1.02144	1.14244	1.00292	1.19735	1.09104	0.0940821	0.148398
1701	1.08913	0.962136	0.552164	1.20789	0.952828	0.285336	0.762662
1703	1.19386	1.02684	1.1108	1.03844	1.09249	0.0771183	0.0959989
1704	1.09959	1.16809	0.946467	1.02281	1.05924	0.0957803	0.304104
1705	1.27361	1.33285	0.990814	1.27618	1.21836	0.154144	0.0660129
1706	0.899428	1.23076	0.918021	1.23408	1.07057	0.187046	0.505316
1709	1.16521	1.32903	0.906669	1.2148	1.15393	0.17854	0.183123
1711	1.15157	1.11933	0.863575	1.3062	1.11017	0.183515	0.316047
1715	0.775114	0.993897	0.782774	0.951074	0.875714	0.113144	0.115501
1717	1.22137	1.07709	0.683404	1.2307	1.05314	0.256326	0.706272
1718	1.71848	0.866812	0.906053	1.24775	1.18477	0.394798	0.418304
1719	1.13697	1.34291	1.07906	1.32624	1.22129	0.133096	0.0448752
1724	1.11963	0.982549	2.58603	1.58433	1.56813	0.725819	0.215437
1725	1.83461	2.31189	1.68381	1.98743	1.95443	0.268612	0.00573317
1727	1.50133	1.70801	1.57258	1.44887	1.5577	0.112304	0.00217139
1728	0.785464	0.899778	0.939768	0.990519	0.903882	0.0872415	0.114797
1730	0.985653	0.825796	1.11051	1.00081	0.980693	0.117297	0.763654
1731	0.99222	1.06254	1.04051	1.15428	1.06239	0.0679353	0.163582
1733	1.40898	1.25243	1.18937	0.632141	1.12073	0.338556	0.527198
1735	1.23893	1.216	0.927851	1.17467	1.13936	0.143493	0.147362
1740	1.14713	1.12476	0.86367	1.31147	1.11176	0.185161	0.313871
1743	0.981159	1.72073	1.31928	1.23643	1.3144	0.306735	0.132766
1746	1.00688	1.58663	1.36903	1.16481	1.28184	0.251529	0.11086
1749	0.931259	1.17349	1.09816	1.01657	1.05487	0.104389	0.370339
1750	0.877762	0.924878	1.03111	1.18182	1.00389	0.134849	0.957574
1751	1.04043	1.23746	0.861567	0.993241	1.03318	0.15581	0.698918
1752	1.11029	1.01025	0.488217	1.34387	0.988156	0.36142	0.951867
1754	1.90833	2.24811	1.62488	1.87414	1.91386	0.256151	0.00566686
1755	0.882537	1.0702	0.973196	1.12579	1.01293	0.107392	0.825217
1757	1.57779	1.41703	1.32983	1.44144	1.44152	0.102704	0.00330769
1758	1.45458	0.932801	0.785457	0.63814	0.952744	0.355526	0.807588
1760	1.32873	1.23562	0.979523	1.73479	1.31967	0.31367	0.134275
1761	2.26103	0.859303	0.890941	1.16994	1.2953	0.658774	0.436036
1762	1.74589	1.68652	1.2272	1.88509	1.63618	0.285066	0.0209454
1763	2.22474	1.82449	1.47307	1.91223	1.85863	0.309154	0.011508
1765	0.970951	0.832368	1.11036	1.00159	0.978818	0.114502	0.735966
1767	1.50223	1.39393	1.44973	1.45259	1.44962	0.0442656	0.000260772
1769	0.904275	1.56532	1.62769	1.26927	1.34164	0.330851	0.130839
1770	1.55632	1.82028	1.58779	1.98108	1.73637	0.20118	0.00526528
1774	1.09881	1.05294	1.0236	1.06004	1.05885	0.0309625	0.0319809
1778	1.05106	1.16672	0.87497	1.23088	1.08091	0.156158	0.376294
1779	1.42195	1.58379	1.37894	1.62321	1.50197	0.119629	0.00354887
1780	1.28304	1.5451	0.927009	1.2748	1.25749	0.253569	0.135224
1781	1.24135	1.47391	0.955197	1.28637	1.23921	0.214458	0.111913
1784	0.63353	0.93935	0.853202	1.08026	0.876586	0.187124	0.278796
1785	1.17048	1.14018	0.957782	1.16268	1.10778	0.100821	0.122076
1792	1.25269	1.61725	1.42062	1.60968	1.47506	0.173927	0.0120554
1793	1.11811	1.1617	1.01786	1.14252	1.11005	0.0639973	0.0412624
1794	1.06302	1.16136	1.0216	1.14491	1.09772	0.0665198	0.0606
1795	1.19376	1.26754	1.06692	1.30196	1.20754	0.104052	0.0282063
1797	1.18981	1.17884	1.15365	1.17066	1.17324	0.0152391	0.000186332
1798	1.30711	1.15119	0.953618	1.0891	1.12525	0.146642	0.186114
1799	1.25674	1.09763	0.907675	1.22063	1.12067	0.157487	0.222938
1801	1.21805	1.29427	0.980913	1.33703	1.20756	0.158912	0.0795255
1802	1.42349	1.34297	1.22075	1.48685	1.36851	0.114762	0.00765162
1804	1.07101	1.19543	0.92537	1.19148	1.09582	0.127464	0.229743
1805	1.08482	1.03675	0.794285	1.03733	0.988296	0.131288	0.869853
1806	1.27995	1.18889	1.05074	1.12014	1.15993	0.0978913	0.0468647
1807	0.897339	1.29465	0.906967	1.39335	1.12308	0.258292	0.410899
1809	1.14319	1.41484	1.42894	1.36993	1.33923	0.133088	0.0145954
1811	1.34841	1.12111	0.602189	1.21814	1.07246	0.327053	0.687688
1813	1.57779	1.41703	1.32983	1.44144	1.44152	0.102704	0.00330769
1815	2.00629	2.28947	2.06024	2.08513	2.11028	0.123907	0.000378902
1816	1.65626	1.82177	1.46473	1.83701	1.69494	0.173937	0.00409026
1820	1.38856	1.50397	1.11898	1.36459	1.34403	0.161898	0.0238725
1822	1.12739	1.09858	1.04606	1.20842	1.12011	0.0678175	0.0383029
1824	1.10005	1.21507	1.07685	1.36093	1.18823	0.130035	0.0627552
1825	1.56287	2.07413	1.63148	2.02618	1.82367	0.263751	0.00827975
1827	1.21118	1.14389	0.849282	1.11837	1.08068	0.159156	0.385305
1828	1.46458	1.60928	1.18936	1.46779	1.43275	0.175727	0.0160402
1829	2.08408	2.4958	2.15977	2.14693	2.22164	0.185736	0.000949009
1830	0.990599	0.908239	0.670748	1.07182	0.910352	0.173135	0.37655
1832	1.85469	2.06303	1.19952	2.30601	1.85581	0.47481	0.0366362
1834	1.41413	1.83813	1.49129	1.72018	1.61593	0.197061	0.00825955
1840	1.21008	1.2859	0.916701	1.19831	1.15275	0.16208	0.155949
1841	1.26022	1.26709	0.897215	1.15216	1.14417	0.172847	0.193867
1842	1.1074	1.31526	1.02466	0.837999	1.07133	0.197843	0.52296
1843	1.37297	1.13586	1.21285	1.45582	1.29438	0.146074	0.0274569
1844	1.21805	1.29427	0.980913	1.33703	1.20756	0.158912	0.0795255
1845	1.18492	1.19058	0.919009	1.2801	1.14365	0.155979	0.162722
1846	1.05774	1.18319	0.844557	0.924019	1.00237	0.149224	0.976614
1848	1.04978	0.858552	0.316102	0.778019	0.750613	0.311289	0.207416
1849	0.933653	1.01652	0.971134	1.05887	0.995043	0.0543916	0.867
1850	1.01172	1.72778	1.31528	1.25729	1.32802	0.297221	0.114396
1852	1.42958	1.89783	1.50971	1.77484	1.65299	0.220026	0.00955861
1853	1.27328	1.52081	1.34319	1.25602	1.34833	0.121007	0.0104132
1855	1.82453	2.16071	1.75065	1.86367	1.89989	0.180086	0.00213214
1856	1.54168	2.99552	1.844	1.48824	1.96736	0.703108	0.0706436
1859	1.1536	1.26645	1.09858	1.12777	1.1616	0.0734267	0.0217401
1860	1.11676	1.25886	0.902108	1.13167	1.10235	0.14794	0.260441
1868	1.09881	1.05294	1.0236	1.06004	1.05885	0.0309625	0.0319809
1869	1.06304	1.17798	0.933025	1.2331	1.10179	0.132955	0.223238
1870	1.26193	1.27985	0.901964	1.13396	1.14443	0.174206	0.195876
1871	1.20285	1.71239	0.922	1.27723	1.27862	0.327148	0.187063
1873	1.08482	1.03675	0.794285	1.03733	0.988296	0.131288	0.869853
1874	1.11529	1.21174	0.947157	1.24156	1.12894	0.132628	0.147087
1878	1.97842	1.24963	1.22016	1.32315	1.44284	0.359671	0.0906685
1880	1.20183	1.20446	0.987481	1.27058	1.16609	0.123248	0.0740853
1881	1.43737	1.76676	1.40403	1.7188	1.58174	0.187475	0.00843051
1882	1.14173	1.3335	1.21588	1.14855	1.20991	0.0889261	0.018001
1883	0.638566	0.840637	0.672779	1.1113	0.815821	0.215875	0.186484
1884	1.00824	1.2158	1.03565	1.2305	1.12255	0.116859	0.126881
1885	1.58902	2.14893	1.56531	1.76507	1.76708	0.269712	0.0107703
1886	1.00415	1.40536	0.579652	1.08625	1.01885	0.34012	0.918731
1887	1.22711	1.1781	1.02107	1.22891	1.1638	0.0980194	0.0443166
1888	1.23786	1.21926	0.956811	1.35483	1.19219	0.168002	0.106155
1889	0.824516	0.893518	0.939669	1.02847	0.921542	0.0855583	0.164013
1894	1.02931	1.11527	0.942123	0.838359	0.981266	0.118632	0.772825
1898	1.05935	0.957343	0.929957	1.09671	1.01084	0.0798579	0.803604
1902	1.13116	1.09718	0.849992	1.06765	1.0365	0.127014	0.60578
1903	1.62978	1.6728	1.52794	1.6711	1.6254	0.0679525	0.000349881
1907	1.1461	1.07054	1.03393	1.36672	1.15432	0.149104	0.130243
1909	1.09959	1.16809	0.946467	1.02281	1.05924	0.0957803	0.304104
1910	1.04139	1.12201	1.12209	0.972176	1.06442	0.0722999	0.172782
1911	1.28961	1.60027	1.01147	1.40154	1.32572	0.245752	0.0769383
1912	0.877788	1.29941	1.33167	1.20872	1.1794	0.2077	0.182534
1913	1.59808	2.18515	1.72148	1.96462	1.86733	0.260925	0.00693553
1914	2.14021	2.02331	2.47952	1.80125	2.11107	0.283015	0.00430312
1915	1.25687	1.35925	0.993193	1.06057	1.16747	0.169875	0.14321
1917	1.25482	0.93449	1.38773	1.0142	1.14781	0.210055	0.254038

## Sheet: mix-5
Supplementary Table 4. BI measurement of compounds in mix-5 from four individual MS affinity assays
Hits are in bold red with mean BI >2.0 and p <0.05
Cpd ID	BI-1	BI-2	BI-3	BI-4	Mean	s.d.	p-value
1925	1.35358	0.965826	0.96174	0.93388	1.05376	0.200388	0.628824
1926	1.27274	1.12381	1.47852	1.38937	1.31611	0.153412	0.025898
1927	0.92091	0.969001	0.997992	1.02892	0.979205	0.0459223	0.431874
1928	1.36087	1.60429	1.95308	2.18233	1.77514	0.36436	0.0237992
1929	0.817445	1.03405	0.602781	1.0983	0.888145	0.225008	0.393394
1931	1.09954	1.03745	1.18773	1.86489	1.2974	0.383315	0.218528
1933	1.07981	0.767319	0.984026	0.914082	0.936309	0.131555	0.404327
1934	1.28153	0.645487	1.09067	0.775033	0.94818	0.29042	0.744822
1935	0.548854	0.784689	1.41744	0.898737	0.912429	0.366844	0.665682
1936	1.19927	0.663367	1.10229	0.788623	0.938387	0.253633	0.660353
1938	1.50317	1.06429	1.03996	1.07466	1.17052	0.222245	0.22246
1939	1.19019	1.25083	0.981407	1.17355	1.14899	0.116556	0.0834614
1943	1.04433	1.22693	1.10612	1.15855	1.13398	0.0775816	0.040818
1948	2.418	2.04043	2.39302	1.86942	2.18022	0.269542	0.00313582
1950	1.00771	0.963006	0.997777	1.00804	0.994135	0.0212923	0.62006
1951	0.92509	1.01961	0.712479	1.9657	1.15572	0.55505	0.613912
1953	1.1071	0.977317	0.982222	0.99242	1.01477	0.0618792	0.665803
1959	2.17155	2.02583	1.64858	1.41653	1.81562	0.345469	0.0179935
1963	0.959944	1.63883	0.597319	2.21024	1.35158	0.716959	0.399035
1966	0.982842	0.853598	1.00927	0.843745	0.922363	0.085867	0.168274
1968	2.68184	1.60467	1.82896	1.29668	1.85304	0.594057	0.0639506
1974	1.40758	0.607535	1.112	0.828167	0.98882	0.347237	0.952707
1975	1.03757	1.59042	1.2388	0.912477	1.19482	0.296016	0.27962
1976	0.91919	1.41177	1.04499	0.854895	1.05771	0.248893	0.67441
1978	0.988461	1.07086	1.15871	1.04037	1.0646	0.0713666	0.167924
1979	1.08599	0.908908	0.921075	0.837223	0.938299	0.105181	0.325376
1981	1.3566	0.891391	1.09406	0.857505	1.04989	0.229603	0.693246
1983	0.979488	1.20266	1.07306	1.14639	1.1004	0.0965044	0.128915
1986	1.27274	1.12381	1.47852	1.38937	1.31611	0.153412	0.025898
1987	1.10737	0.803237	0.981746	0.791564	0.92098	0.151709	0.374102
1988	1.0044	0.692709	1.06729	0.646753	0.852788	0.213754	0.262164
1989	1.06934	1.06365	0.843483	0.926819	0.975823	0.110113	0.690267
1991	1.08663	1.80681	1.11151	1.05172	1.26417	0.362595	0.24114
1994	0.548854	0.784689	1.41744	0.898737	0.912429	0.366844	0.665682
1996	0.959944	1.63883	0.597319	2.21024	1.35158	0.716959	0.399035
1997	1.86919	2.41088	1.38306	1.40055	1.76592	0.485358	0.0510244
1998	0.616324	1.05356	0.671743	1.17827	0.879974	0.278078	0.451492
1999	1.25623	1.75493	1.3717	1.02842	1.35282	0.303652	0.102723
2000	0.91919	1.41177	1.04499	0.854895	1.05771	0.248893	0.67441
2001	0.645245	1.00708	0.53283	1.19808	0.845809	0.309993	0.393158
2005	1.10624	1.03369	1.05067	0.864403	1.01375	0.104276	0.809039
2006	1.0823	1.1242	1.07715	1.31676	1.1501	0.113082	0.0766831
2007	1.46065	1.01089	0.877688	1.18449	1.13343	0.251727	0.366879
2009	0.747453	1.62999	1.16558	0.860234	1.10082	0.394533	0.644543
2010	2.0954	2.02113	0.992127	1.98478	1.77336	0.522852	0.0596285
2015	1.13803	1.355	0.446386	1.16897	1.0271	0.398822	0.900523
2017	0.930527	1.02147	1.08896	0.948282	0.997308	0.0726789	0.945618
2022	1.19615	0.697278	0.909614	0.764617	0.891914	0.221329	0.400749
2023	1.76692	2.12305	1.432	1.41843	1.6851	0.333502	0.0261072
2024	1.05141	1.14355	1.08666	1.25529	1.13423	0.0891925	0.0572205
2025	0.957396	1.1308	1.0349	1.02988	1.03824	0.071142	0.361093
2031	1.24757	1.76081	1.27026	1.38364	1.41557	0.237729	0.0395906
2032	1.02747	1.34575	0.886159	0.983941	1.06083	0.198925	0.58404
2034	1.06644	1.01634	0.92745	0.917558	0.981947	0.0717354	0.64937
2037	0.96308	1.49618	1.08361	0.910178	1.11326	0.265392	0.456093
2040	1.02565	1.34021	0.88555	0.984828	1.05906	0.196452	0.590056
2045	1.04297	1.21913	0.976936	1.3735	1.15313	0.178979	0.18557
2047	1.03956	0.922906	0.807601	0.923624	0.923422	0.0946958	0.204227
2048	1.52585	1.13089	1.06838	0.959442	1.17114	0.246856	0.25965
2049	1.19386	1.12401	1.05726	1.15362	1.13219	0.0575738	0.0194049
2055	1.07135	1.66889	1.10073	1.00128	1.21056	0.308387	0.26545
2057	1.0195	0.816703	1.00776	0.963446	0.951854	0.0932784	0.37786
2068	1.0129	1.01546	0.87902	1.01014	0.979378	0.0669407	0.581409
2070	1.0147	1.14303	0.295238	1.02741	0.870096	0.387562	0.550615
2071	1.48264	1.37316	0.243629	1.05487	1.03857	0.560162	0.899185
2072	0.921834	1.09653	0.866449	0.950324	0.958785	0.0982127	0.462912
2075	1.07135	1.66889	1.10073	1.00128	1.21056	0.308387	0.26545
2076	0.903781	1.31287	0.963342	1.00656	1.04664	0.182418	0.644375
2077	0.983631	1.02717	0.887148	0.976744	0.968674	0.0587575	0.364489
2078	1.69336	1.65042	1.39515	1.3058	1.51118	0.189929	0.0125587
2082	1.32793	2.39519	1.37805	1.5157	1.65422	0.50032	0.0793288
2084	1.06096	1.07436	1.06583	1.13253	1.08342	0.0332065	0.0151878
2088	0.837138	1.02903	0.768959	0.841798	0.869232	0.111615	0.100929
2091	1.49215	1.4249	1.23142	1.10628	1.31369	0.177013	0.0382484
2092	1.44854	1.53576	1.17653	1.13001	1.32271	0.19977	0.0481857
2093	1.10148	1.32872	0.637362	1.11529	1.04571	0.291429	0.774285
2094	1.5448	1.89127	0.988778	0.99755	1.3556	0.441777	0.205805
2095	0.796896	1.26263	0.686882	0.916323	0.915683	0.249555	0.547633
2096	1.11235	1.2735	0.553996	1.16792	1.02694	0.322304	0.877858
2097	1.9904	1.08082	1.53811	1.24103	1.46259	0.399637	0.10355
2099	1.22304	0.794841	1.09093	0.839759	0.987142	0.204223	0.907761
2102	1.01807	1.29278	1.02704	1.27243	1.15258	0.150413	0.1355
2103	1.19984	1.0625	1.26028	0.921634	1.11106	0.150984	0.237612
2109	1.17984	0.848005	0.992437	0.955215	0.993874	0.138271	0.934975
2112	1.2401	1.14871	1.1812	0.902083	1.11802	0.148845	0.210963
2113	1.4228	0.751916	1.13842	0.748299	1.01536	0.327555	0.931199
2115	1.21433	1.27708	1.24277	1.04376	1.19448	0.103707	0.0331021
2117	1.33974	1.17132	1.23406	1.07498	1.20502	0.111115	0.0345098
2118	0.613179	1.35237	1.05354	0.919134	0.984556	0.306727	0.926138
2119	1.34823	1.05803	1.30115	1.13714	1.21114	0.136395	0.0534638
2120	2.17155	2.02583	1.64858	1.41653	1.81562	0.345469	0.0179935
2121	1.3554	0.418533	1.03367	0.661839	0.867358	0.412117	0.56559
2125	0.928708	1.14532	1.0604	1.33188	1.11658	0.168951	0.261449
2129	1.29848	1.20588	0.479302	1.06177	1.01136	0.367833	0.954641
2133	1.07871	1.45021	1.04805	0.983442	1.1401	0.210514	0.275287
2134	1.27274	1.12381	1.47852	1.38937	1.31611	0.153412	0.025898
2137	0.966819	1.04777	0.948995	1.43071	1.09857	0.225556	0.446424
2138	1.6096	1.003	1.27705	0.926809	1.20412	0.309345	0.278617
2140	0.947005	1.05429	0.835044	0.941678	0.944505	0.0895349	0.303245
2141	1.2799	1.01767	1.03405	1.21525	1.13672	0.130868	0.127849
2145	0.930985	1.05768	0.832643	0.828006	0.912329	0.107914	0.202666
2150	0.936855	1.45338	1.19939	1.02716	1.1542	0.227253	0.267837
2154	1.16448	0.924124	0.810652	1.30474	1.051	0.224445	0.680375
2156	1.25558	0.714039	1.00716	1.01255	0.997332	0.221567	0.982301
2157	1.25558	0.714039	1.00716	1.01255	0.997332	0.221567	0.982301
2158	1.38027	1.05846	1.03075	0.897218	1.09167	0.204872	0.436764
2165	1.48565	1.30249	0.366666	0.92156	1.01909	0.494356	0.943296
2166	1.46412	1.03986	1.43312	1.26604	1.30079	0.194491	0.0535855
2168	1.28536	0.847018	0.835361	0.995409	0.990787	0.209462	0.935448
2169	0.98441	2.22515	1.83655	1.59241	1.65963	0.520113	0.0849402
2178	1.02582	1.22523	0.982084	1.03953	1.06816	0.107536	0.29434
2180	1.19742	1.31326	0.997738	1.7209	1.30733	0.304961	0.137247
2183	0.901862	1.6051	0.901453	1.14783	1.13906	0.331657	0.463257
2188	0.789175	0.787757	0.861962	0.908261	0.836789	0.0589159	0.0115905
2192	0.834381	1.29662	0.920348	1.1203	1.04291	0.207256	0.706621
2193	1.6096	1.003	1.27705	0.926809	1.20412	0.309345	0.278617
2194	1.40673	1.35001	1.39672	1.43347	1.39673	0.0347961	0.000184704
2195	1.07565	1.09737	1.13305	2.16196	1.36701	0.530495	0.260448
2196	0.782399	0.640451	1.23202	1.00015	0.913756	0.258656	0.552567
2198	1.4228	0.751916	1.13842	0.748299	1.01536	0.327555	0.931199
2199	1.38369	1.38634	1.213	1.04051	1.25589	0.164901	0.0531492
2201	1.16576	1.07486	1.12123	0.990174	1.08801	0.0750411	0.100709
2202	1.33974	1.17132	1.23406	1.07498	1.20502	0.111115	0.0345098
2203	1.81881	0.569037	1.2959	1.13258	1.20408	0.514688	0.485688
2209	0.952558	1.19701	0.96756	1.15594	1.06827	0.126216	0.358564
2211	4.62459	6.91737	2.47726	3.81201	4.45781	1.86341	0.0340118
2217	1.16125	0.999788	0.902899	0.743101	0.95176	0.175233	0.62027
2219	1.49137	1.39536	1.24437	1.25977	1.34772	0.117362	0.00960432
2221	1.31917	0.903774	2.15534	1.02192	1.35005	0.564588	0.303117
2224	1.04269	0.847018	0.835361	0.995409	0.930119	0.104594	0.273789
2226	1.12434	1.27649	1.02057	1.18428	1.15142	0.107357	0.0666906
2227	2.10487	2.03814	1.84762	1.64551	1.90904	0.206749	0.00309822
2240	1.10662	1.13294	0.971271	1.02137	1.05805	0.074932	0.219052
2241	0.973249	1.10925	0.77077	0.943663	0.949233	0.13912	0.518319
2244	1.17984	0.848005	0.992437	0.955215	0.993874	0.138271	0.934975
2245	1.04538	0.708966	0.755225	1.02409	0.883414	0.175961	0.277012
2248	1.20231	1.13312	0.919477	1.06125	1.07904	0.120963	0.282429
2254	1.00885	1.16384	1.05102	0.883705	1.02685	0.115708	0.674124
2257	0.854486	1.05612	1.03497	1.11575	1.01533	0.112553	0.802966
2258	1.19614	0.444775	0.542861	0.667433	0.712802	0.334858	0.18479
2260	0.954557	0.725633	1.46302	0.656251	0.949865	0.365073	0.801406
2263	0.781082	0.689929	0.995254	1.11899	0.896314	0.195999	0.367698
2265	0.931119	1.17102	1.08583	1.08306	1.06776	0.0998213	0.267703
2268	1.16203	0.637503	0.932871	0.73199	0.866098	0.232575	0.33298
2269	0.748546	1.32495	1.00348	0.972436	1.01235	0.237334	0.923653
2270	1.81313	1.80069	1.33856	1.478	1.60759	0.237141	0.0143882
2277	1.16827	0.977045	1.18098	0.924809	1.06278	0.131005	0.408568
2280	1.05422	0.786101	1.24757	0.879745	0.99191	0.203458	0.941623
2281	1.02609	1.41349	0.960242	1.16763	1.14186	0.200696	0.252347
2283	0.685548	1.0006	0.952255	0.992453	0.907713	0.14961	0.305155
2286	1.14118	0.939816	1.02252	0.877993	0.995377	0.113814	0.940375
2287	0.813407	1.06888	0.836566	0.954646	0.918374	0.117866	0.260055
2288	1.49631	1.57463	0.853165	1.37619	1.32508	0.32502	0.13928
2291	0.965072	1.21403	0.741991	1.34917	1.06757	0.269109	0.650099
2292	0.922524	0.923351	0.967451	1.18574	0.999767	0.125747	0.99727
2293	0.992293	1.1658	1.04639	1.10377	1.07706	0.0746416	0.130879
2296	1.22304	0.794841	1.09093	0.839759	0.987142	0.204223	0.907761
2301	1.08309	1.00222	0.961225	0.923296	0.992459	0.0684797	0.839816
2302	1.24004	0.651341	0.999286	0.685753	0.894106	0.278736	0.502617
2304	0.907484	1.30764	0.894778	1.07561	1.04638	0.192688	0.663179
2306	1.17984	0.848005	0.992437	0.955215	0.993874	0.138271	0.934975
2309	1.03588	1.23622	1.10741	0.893522	1.06826	0.142976	0.410117
2310	1.19445	1.10013	1.07987	1.07253	1.11175	0.0563566	0.0286471
2312	1.10148	1.32872	0.637362	1.11529	1.04571	0.291429	0.774285
2321	0.999753	0.952396	0.982874	0.984764	0.979947	0.0198585	0.136705
2325	1.27063	1.23094	1.37685	1.31448	1.29823	0.0625391	0.00244497
2330	1.9954	1.02113	0.992127	1.98478	1.49836	0.567943	0.177535
2333	0.998763	0.677458	0.957752	0.669054	0.825757	0.17692	0.143483
2335	0.959556	1.48191	1.08198	0.909202	1.10816	0.259513	0.465685
2337	1.31541	1.14704	1.09387	1.40647	1.2407	0.145366	0.0453381
2343	1.02843	1.07521	0.927519	1.03174	1.01572	0.0625479	0.649693
2345	1.90836	0.930693	1.36603	1.08911	1.32355	0.429381	0.228899
2348	0.582044	1.18996	0.494986	1.23705	0.876009	0.391793	0.571726
2349	0.579167	0.616609	0.474436	0.738482	0.602173	0.108987	0.00530686
2353	2.04835	2.42238	1.57978	1.4234	1.86848	0.454827	0.0315962
2355	1.74835	2.42238	1.57978	1.4234	1.79348	0.439765	0.0365387
2356	0.916796	0.832214	1.05788	0.67128	0.869543	0.161664	0.204946
2357	1.53191	1.24378	1.49661	1.17511	1.36185	0.178781	0.0271463
2358	2.36087	1.60429	1.95308	1.18233	1.77514	0.501783	0.0537321
2359	1.11701	0.837448	0.960171	1.03776	0.988099	0.11911	0.854393
2363	1.25383	1.14888	0.827117	1.14494	1.09369	0.184731	0.385115
2364	1.62072	1.59037	0.914872	1.95956	1.52138	0.437601	0.0973625
2367	1.4307	1.3931	1.05845	1.30256	1.2962	0.16738	0.0383834
2370	1.4093	0.565812	1.12442	0.958513	1.01451	0.352327	0.939539
2371	0.692775	1.00967	0.888361	0.774868	0.841418	0.137884	0.104967
2374	1.11215	0.825728	1.16507	0.805685	0.97716	0.187856	0.823555
2377	1.93251	1.23504	1.61074	1.12697	1.47631	0.368074	0.0812053
2381	0.932172	1.07793	0.993245	0.966286	0.992409	0.0622526	0.823062
2383	1.0321	0.88861	1.00511	1.02243	0.98706	0.0665763	0.723431
2384	1.63574	0.919459	1.2212	0.912742	1.17229	0.340815	0.38647
2386	1.18323	0.709567	1.03828	0.748662	0.919936	0.228707	0.53425
2387	1.22621	1.84241	0.868713	1.7237	1.41526	0.45168	0.163245
2388	1.31043	1.06624	1.27493	0.736308	1.09698	0.263475	0.51498
2390	1.85889	1.75931	1.62524	1.30295	1.6366	0.242161	0.0134043
2392	1.51956	1.9958	1.11456	1.68151	1.57786	0.366725	0.0512085
2394	1.40758	0.607535	1.112	0.828167	0.98882	0.347237	0.952707
2395	1.10707	1.48984	0.774954	1.02068	1.09813	0.296625	0.555462
2398	1.02327	2.31112	1.90404	1.68188	1.73008	0.538447	0.0730535
2399	0.426644	0.897897	0.364688	0.427035	0.529066	0.247627	0.0319269
2400	1.13554	0.983308	1.16639	1.00265	1.07197	0.0924165	0.217216

## Sheet: mix-6
Supplementary Table 4. BI measurement of compounds in mix-6 from four individual MS affinity assays
Hits are in bold red with mean BI >2.0 and p <0.05
Cpd ID	BI-1	BI-2	BI-3	BI-4	Mean	s.d.	p-value
2401	2.07233	2.29523	2.39029	2.20633	2.24104	0.135253	0.00035305
2404	1.50773	0.490194	0.521406	0.685771	0.801275	0.478719	0.467301
2405	0.428152	0.810598	0.98594	1.09617	0.830216	0.292703	0.32994
2411	1.69328	1.87222	2.08518	1.79681	1.86187	0.165963	0.0019045
2414	1.7796	1.83114	1.82838	1.72774	1.79172	0.0487789	6.42523e-05
2422	1.04136	1.19234	1.24473	1.28678	1.1913	0.107166	0.0375465
2423	0.90459	1.01766	1.08274	0.924301	0.982322	0.0831478	0.69933
2425	1.13607	1.07601	1.1585	1.04869	1.10482	0.0511183	0.0262345
2426	1.13592	1.13656	1.01983	0.825164	1.02937	0.146781	0.715827
2427	1.37998	1.2294	1.29336	1.28305	1.29645	0.0623486	0.00246594
2430	0.721458	0.882439	0.551394	0.876497	0.757947	0.156576	0.0536367
2431	0.605129	0.76996	0.813316	0.807734	0.749035	0.097851	0.014348
2433	0.766576	0.791225	0.802451	0.733379	0.773408	0.0306043	0.000668204
2438	0.872201	0.773839	0.781065	0.827731	0.813709	0.0457282	0.00386628
2443	0.300624	0.361725	0.462962	0.464969	0.39757	0.080627	0.000650346
2444	0.704452	0.65669	0.740743	0.721879	0.705941	0.0360234	0.000500028
2445	1.24317	1.08303	1.08772	1.00501	1.10473	0.0997833	0.126659
2447	0.569664	0.68494	0.688029	0.667329	0.65249	0.0559654	0.00112511
2449	0.63916	1.55672	1.07395	1.20988	1.11993	0.379528	0.572281
2450	0.496804	1.05052	0.869856	1.04956	0.866685	0.260807	0.381871
2451	0.757024	0.583208	0.49986	0.803946	0.661009	0.143378	0.0179233
2453	0.584984	0.713822	0.803739	0.801066	0.725903	0.102814	0.0128941
2455	0.45544	0.57347	0.553271	0.524512	0.526673	0.0515626	0.0003526
2461	0.318927	0.80434	0.774978	0.711531	0.652444	0.225693	0.0541402
2462	0.643814	0.615002	0.648155	0.551628	0.61465	0.044516	0.000419924
2463	0.85848	1.33919	1.60137	1.43341	1.30811	0.318764	0.148705
2464	1.51161	1.16101	1.53057	1.23419	1.35935	0.1893	0.032079
2465	0.999646	0.921298	0.873429	0.818027	0.9031	0.0769635	0.0863224
2467	0.951956	0.684845	0.700034	0.49267	0.707376	0.188396	0.0530272
2468	0.484717	0.663077	0.783253	0.811865	0.685728	0.148706	0.0242209
2469	1.4767	1.60351	1.39801	0.991593	1.36745	0.264489	0.069072
2470	0.883917	0.796687	0.824738	0.750403	0.813936	0.0558212	0.00688154
2471	0.598977	0.609997	0.638341	0.644336	0.622913	0.0218838	5.37166e-05
2473	0.519027	0.572335	0.581511	0.734448	0.60183	0.0926042	0.00330612
2474	0.59764	0.511237	0.742527	0.877371	0.682194	0.161359	0.0291533
2476	1.5641	0.757369	1.01223	0.860771	1.04862	0.359238	0.804203
2477	0.590825	0.656896	0.626851	0.669455	0.636007	0.0350255	0.000243582
2478	0.701073	0.836729	0.941891	0.765396	0.811272	0.103212	0.0353164
2480	1.78688	1.65412	1.98982	2.05933	1.87254	0.185914	0.00256156
2481	0.787639	0.719848	0.75045	0.701526	0.739866	0.0377049	0.000823817
2482	0.560208	0.588294	0.640784	0.574488	0.590943	0.0351499	0.00017375
2483	0.548763	0.607532	0.628193	0.68192	0.616602	0.0550309	0.000800307
2488	1.74224	2.11698	1.62092	1.88263	1.84069	0.212986	0.0042363
2490	1.84924	1.74819	2.59194	2.35756	2.13673	0.403978	0.0110967
2493	1.54677	1.42371	1.34029	1.29084	1.4004	0.11193	0.00562325
2494	0.992778	1.0376	0.924889	0.932536	0.971951	0.0532666	0.3696
2496	2.24398	2.71128	2.58448	2.26485	2.45115	0.233148	0.00111723
2499	0.560407	0.57174	0.654031	0.767666	0.638461	0.0957087	0.00480876
2501	0.7929	0.731058	0.734887	0.71614	0.743746	0.0337521	0.000620204
2503	0.492073	0.532229	0.560721	0.847547	0.608143	0.162068	0.0168643
2504	0.956224	1.01488	0.895999	0.735993	0.900774	0.120099	0.197021
2505	0.777545	0.706863	0.643081	0.613041	0.685133	0.0729789	0.00327326
2508	0.609655	0.725397	0.673977	0.642606	0.662909	0.049246	0.00084328
2509	0.951956	0.684845	0.700034	0.49267	0.707376	0.188396	0.0530272
2510	0.697146	0.823037	1.07133	0.674378	0.816472	0.182047	0.13715
2513	0.363317	0.58153	0.645491	0.521671	0.528003	0.120872	0.00437001
2514	0.723082	1.15502	1.14222	1.25191	1.06806	0.23514	0.603273
2520	1.05011	1.19702	1.36742	1.1318	1.18659	0.134709	0.0695549
2522	0.581517	0.565934	0.615321	0.623522	0.596574	0.0273443	8.54858e-05
2523	0.873796	0.858268	0.87542	0.809497	0.854245	0.0308176	0.0025044
2525	0.828693	0.820706	0.70045	0.778846	0.782174	0.0587046	0.00506268
2530	0.790996	1.42543	1.44399	1.4309	1.27283	0.321315	0.188035
2531	0.913733	1.2085	0.788245	0.750216	0.915174	0.207658	0.473783
2533	0.483863	0.592912	0.63333	0.562011	0.568029	0.0632549	0.000849143
2536	1.20041	1.65127	1.85384	1.75055	1.61402	0.287876	0.0236365
2537	1.24383	1.22669	1.21441	1.087	1.19298	0.0716785	0.0125476
2538	0.966039	0.600759	0.549621	0.517387	0.658451	0.207912	0.0462336
2542	0.358026	0.49348	0.619996	0.958298	0.60745	0.257198	0.0553185
2543	0.519023	0.698778	0.86239	0.662546	0.685684	0.141077	0.0210388
2545	0.404178	0.688161	0.749278	0.641798	0.620854	0.151008	0.015212
2546	0.951086	0.962489	0.844151	0.673101	0.857707	0.134117	0.123955
2548	0.340246	0.775746	0.419221	1.03136	0.641643	0.321545	0.112104
2549	1.10695	1.30748	1.2352	1.30992	1.23989	0.0951629	0.0150465
2550	0.335786	0.493122	0.731196	0.609465	0.542392	0.168582	0.0122652
2551	0.853309	0.787619	1.26367	1.13777	1.01059	0.227066	0.931551
2552	0.717187	0.972091	0.969466	0.92048	0.894806	0.120768	0.179858
2553	0.600953	1.39785	0.464317	0.650676	0.778448	0.420382	0.369251
2556	1.03073	1.03783	1.10092	0.845425	1.00373	0.11015	0.950294
2561	1.18034	1.23443	1.27253	1.04762	1.18373	0.0983071	0.0333946
2566	1.17122	1.1621	1.38896	1.07988	1.20054	0.132156	0.0560932
2568	1.71698	1.54171	1.60449	1.33128	1.54861	0.162017	0.00657929
2576	0.371442	0.581841	0.777463	1.10044	0.707796	0.309849	0.155752
2577	0.561946	0.623156	0.69733	0.538142	0.605144	0.0711291	0.00156555
2578	0.506111	0.696859	0.846954	0.647024	0.674237	0.140653	0.0189524
2579	1.32923	0.864031	1.13395	0.788247	1.02887	0.24922	0.831708
2580	0.550815	0.552324	0.610436	0.509583	0.555789	0.0414651	0.000222467
2581	0.636874	0.699051	1.05258	0.974376	0.840719	0.203609	0.215642
2583	0.452357	1.20025	0.87472	0.783801	0.827781	0.307577	0.344352
2584	0.948685	0.867614	0.911825	0.856231	0.896089	0.0424792	0.016337
2586	0.50541	0.559894	0.63654	0.599049	0.575223	0.0560842	0.000624666
2587	0.458983	0.69235	0.809143	0.865842	0.70658	0.180176	0.0472371
2588	0.539346	0.721177	0.480211	1.01586	0.689147	0.240734	0.0815999
2589	0.911143	0.819304	1.13097	1.09484	0.989064	0.148566	0.892295
2590	1.12331	0.847706	1.29273	1.2228	1.12163	0.195404	0.301535
2592	0.561946	0.623156	0.69733	0.538142	0.605144	0.0711291	0.00156555
2593	0.148312	0.123809	0.115396	0.0994157	0.121733	0.020404	3.45493e-06
2594	0.793521	0.368776	0.876275	0.693207	0.682945	0.222419	0.0650573
2595	0.560123	0.605375	0.724793	0.651413	0.635426	0.0702751	0.00191026
2597	1.02216	1.01149	0.918518	0.944798	0.974242	0.0505169	0.382904
2598	2.59832	1.66124	2.6339	2.10434	2.24945	0.460637	0.0122906
2602	2.39438	1.94833	1.67368	1.42374	1.86003	0.41569	0.0256222
2604	0.655022	0.688006	0.634549	0.778584	0.68904	0.0636284	0.00227559
2605	0.503303	0.514966	0.62112	0.57285	0.55306	0.0546221	0.000496514
2607	1.02616	0.914838	0.919878	0.861421	0.930574	0.0689942	0.137647
2608	0.496194	0.578428	0.75668	0.798377	0.65742	0.143707	0.0175265
2609	0.587382	0.531007	0.609914	0.575399	0.575925	0.0331883	0.000131408
2610	1.06263	1.20918	1.03744	1.03935	1.08715	0.0821555	0.124
2614	0.623597	0.624745	0.489149	0.421867	0.53984	0.101179	0.00280762
2621	0.519023	0.698778	0.86239	0.662546	0.685684	0.141077	0.0210388
2622	0.793521	0.368776	0.876275	0.693207	0.682945	0.222419	0.0650573
2623	0.664483	0.511993	0.513317	0.740386	0.607545	0.113868	0.00625538
2626	0.784957	1.31833	1.07672	0.871557	1.01289	0.237556	0.920418
2628	1.14642	1.17032	0.706924	0.456475	0.870036	0.348425	0.5098
2631	0.911413	0.941201	0.931753	0.998179	0.945637	0.0371681	0.0612343
2632	1.21943	1.22656	1.84481	1.54408	1.45872	0.298615	0.0544637
2633	0.560876	0.594683	0.670169	0.660094	0.621456	0.0524485	0.000720737
2635	0.514255	0.518432	0.533781	0.522972	0.52236	0.0084053	1.50182e-06
2636	0.862253	0.781075	0.806644	0.739759	0.797433	0.0512525	0.00422033
2639	0.916027	0.743816	0.85964	0.825201	0.836171	0.0720591	0.0199246
2640	0.511141	0.78336	0.875883	0.916962	0.771836	0.182558	0.0877349
2642	0.238166	0.863126	1.00406	1.10591	0.802815	0.389372	0.385728
2643	0.793917	0.465455	0.678512	0.598425	0.634077	0.138115	0.0131184
2647	0.97056	0.696713	0.544429	0.569115	0.695204	0.195324	0.052434
2648	1.46141	1.01332	1.04402	0.787539	1.07657	0.280892	0.623532
2649	1.11381	0.999712	0.906261	1.0501	1.01747	0.0876163	0.716703
2651	0.555123	0.558015	0.794222	0.780263	0.671906	0.133307	0.0160659
2652	0.458709	0.591598	0.730308	0.657755	0.609592	0.115443	0.00660341
2654	1.03467	1.24113	1.48381	1.53845	1.32452	0.232454	0.0683006
2656	0.561677	0.683388	0.674223	0.614506	0.633448	0.0567641	0.00100208
2657	1.3419	1.51839	1.8885	1.46846	1.55431	0.234847	0.0180058
2658	0.563178	2.50362	1.53223	1.66221	1.56531	0.794812	0.250032
2666	0.591677	0.624342	0.740828	0.716634	0.66837	0.0716469	0.00266725
2668	0.5104	0.61278	0.739805	0.741474	0.651115	0.111506	0.00823532
2670	0.566312	0.766987	0.839223	0.807351	0.744969	0.122717	0.0253212
2672	0.919838	1.25313	1.40987	1.19648	1.19483	0.204338	0.15259
2673	0.895117	0.775101	1.10308	0.979173	0.938117	0.138228	0.436566
2676	0.87262	0.708007	0.971456	1.11661	0.917174	0.171714	0.405857
2680	0.765372	0.971524	1.20087	1.04007	0.994461	0.180458	0.954912
2681	0.702461	0.692935	0.879868	0.819877	0.773785	0.0912905	0.0157702
2683	1.22855	1.08038	1.45579	1.16678	1.23288	0.160554	0.0624562
2686	2.88181	1.42267	1.46454	1.22686	1.74897	0.762298	0.144143
2687	0.75919	1.02478	1.25845	1.14141	1.04596	0.213658	0.696086
2692	0.675576	0.697253	0.765131	0.842014	0.744993	0.0750916	0.00652537
2694	1.16712	2.05417	1.36026	1.05685	1.4096	0.447638	0.16466
2695	1.18049	1.12653	0.975823	0.955269	1.05953	0.111053	0.362257
2696	0.806589	0.598355	0.65605	0.906556	0.741888	0.14056	0.0349363
2699	0.737426	0.608974	1.36112	0.760049	0.866892	0.336135	0.486214
2700	0.710204	0.469336	0.748574	0.545234	0.618337	0.132849	0.0104707
2701	0.574244	0.46576	0.803231	0.758764	0.6505	0.158105	0.0214861
2704	1.27447	1.26274	1.01339	0.968824	1.12986	0.161314	0.205777
2706	2.08184	1.54264	0.455299	1.1659	1.31142	0.683404	0.429294
2707	0.496804	1.05052	0.869856	1.04956	0.866685	0.260807	0.381871
2709	0.814979	1.05288	0.912181	0.851593	0.907909	0.104631	0.176581
2710	0.623625	0.842935	0.820656	0.945758	0.808244	0.1346	0.0651481
2714	0.558842	0.728135	0.361183	0.670012	0.579543	0.161631	0.013799
2715	0.323961	1.16631	1.01151	0.747143	0.812232	0.36866	0.383361
2716	0.459565	1.16301	1.36034	0.996933	0.994962	0.386607	0.980842
2717	0.438141	0.778224	0.984899	0.987646	0.797228	0.258705	0.21497
2718	0.563651	0.750755	0.900445	0.926753	0.785401	0.166922	0.0824039
2719	0.951956	0.684845	0.700034	0.49267	0.707376	0.188396	0.0530272
2722	0.6674	1.25713	1.15713	1.11259	1.04856	0.261197	0.734714
2723	1.17183	1.14715	1.11409	0.643298	1.01909	0.251643	0.889023
2725	0.434399	0.487298	0.508236	0.499422	0.482339	0.0330926	7.1753e-05
2728	0.700306	2.47148	1.95163	2.01543	1.78471	0.759095	0.130556
2730	1.14322	0.880891	1.20023	0.824037	1.0121	0.187234	0.905376
2732	1.11115	1.27494	1.40418	1.35881	1.28727	0.129045	0.0210858
2733	0.666519	0.554625	0.671749	0.686275	0.644792	0.0606893	0.0013396
2734	0.834456	0.774908	0.859555	0.80223	0.817787	0.0369822	0.00222204
2736	0.486359	2.19366	1.58797	1.49414	1.44053	0.707641	0.301499
2739	0.699053	0.729656	0.767371	0.716597	0.728169	0.0289864	0.000330859
2740	0.591363	1.03453	0.873725	0.897273	0.849223	0.185957	0.203333
2749	1.00093	1.08068	1.26606	1.80384	1.28788	0.361463	0.209441
2751	2.05924	2.1627	1.97287	2.24814	2.11074	0.120057	0.000344482
2757	0.623532	0.731929	0.898507	0.85821	0.778044	0.125084	0.0381207
2759	1.64784	1.44057	1.54516	1.68508	1.57966	0.109995	0.00182424
2763	1.17781	0.985437	0.985002	0.93828	1.02163	0.106445	0.711665
2764	1.52605	1.17743	0.8796	1.21726	1.20009	0.264432	0.227408
2765	1.30648	1.23513	1.25449	1.08845	1.22114	0.0934487	0.0178803
2766	0.728843	0.686069	0.789606	0.757342	0.740465	0.0439458	0.00130452
2768	0.674605	0.538522	0.718296	0.650014	0.645359	0.0766177	0.00266719
2769	1.15101	1.0868	1.603	1.45679	1.3244	0.246076	0.0778853
2770	0.973349	1.0849	1.23365	1.21822	1.12753	0.122576	0.128906
2771	2.21105	2.18142	2.26875	2.27735	2.23464	0.0461023	1.43345e-05
2775	0.382843	0.669328	0.959952	1.01013	0.755563	0.290364	0.190836
2776	0.709088	0.706153	0.790997	0.751011	0.739312	0.0400882	0.000981525
2777	0.778461	0.94309	1.06105	0.933136	0.928933	0.115922	0.307623
2778	0.647294	0.706838	0.6365	0.772721	0.690838	0.0627416	0.00222137
2779	0.543507	1.00157	0.971935	0.96871	0.87143	0.219115	0.32527
2780	0.38438	0.674033	0.742668	1.07566	0.719184	0.283877	0.142274
2783	1.50612	1.30679	1.24057	1.20964	1.31578	0.133208	0.0177949
2784	0.770058	0.739128	0.873286	0.878277	0.815187	0.0711277	0.0138432
2785	1.30396	1.25154	1.22175	1.30019	1.26936	0.039715	0.000866599
2788	0.788253	0.811596	0.884422	1.06859	0.888215	0.127034	0.17665
2790	0.932593	0.775343	0.800008	0.855032	0.840744	0.0697065	0.0196641
2791	0.859678	0.605731	0.629015	0.769371	0.715949	0.120024	0.0178758
2792	1.82351	1.06633	2.10031	2.14429	1.78361	0.498821	0.0515895
2793	0.41849	0.486864	0.548823	0.704925	0.539776	0.122292	0.00486108
2794	0.478295	0.566457	0.783923	0.750214	0.644722	0.146434	0.0167066
2795	0.516266	0.609564	0.604137	0.658453	0.597105	0.0591698	0.000856522
2797	1.5072	1.65454	2.24307	1.84412	1.81223	0.318618	0.01459
2798	0.324601	0.578568	0.477719	0.664579	0.511367	0.146064	0.00681066
2800	1.19994	1.10218	0.88785	1.06665	1.06415	0.130348	0.397521
2802	0.558842	0.728135	0.361183	0.670012	0.579543	0.161631	0.013799
2806	0.839627	0.780657	1.05165	0.574597	0.811633	0.196246	0.150683
2808	0.667351	0.746294	0.905672	0.883122	0.80061	0.113365	0.038982
2809	0.381253	0.913243	1.11778	1.15106	0.890836	0.355622	0.582676
2811	0.717028	0.92018	1.20287	1.02905	0.967283	0.203441	0.768834
2812	1.73059	1.63575	2.08144	2.13907	1.89671	0.250704	0.00562555
2813	1.13645	1.34596	1.55007	1.4474	1.36997	0.176578	0.0247812
2814	0.524904	0.679426	0.632252	0.618224	0.613701	0.0647285	0.00126483
2816	0.611511	0.652919	0.804096	0.929798	0.749581	0.145896	0.0414521
2817	0.300205	0.352758	0.972104	0.858002	0.620767	0.34366	0.114419
2818	1.13382	0.804835	0.613407	0.938947	0.872752	0.219402	0.329996
2819	0.365158	0.604598	0.854318	1.02354	0.711903	0.288181	0.139406
2822	0.48253	0.627543	0.584064	0.534361	0.557125	0.0626286	0.00076576
2825	0.69495	0.977302	1.02576	1.02865	0.931664	0.159557	0.454653
2827	0.577612	1.09638	1.21532	1.26659	1.03898	0.315732	0.820914
2830	1.18595	1.0984	0.94824	0.98129	1.05347	0.109321	0.40011
2834	0.594927	0.594503	0.527348	0.85038	0.641789	0.14264	0.0152035
2836	1.19972	1.17071	1.22868	1.1178	1.17923	0.0472967	0.00476531
2840	1.15779	1.08848	1.03146	0.726939	1.00117	0.189978	0.990948
2841	0.60109	0.514068	0.590171	0.491815	0.549286	0.0544625	0.000480056
2844	1.12888	1.11657	1.40998	1.0462	1.17541	0.160567	0.116814
2845	1.00748	0.920428	0.743214	1.05713	0.932065	0.137998	0.397425
2847	0.954712	0.88434	0.363417	0.483208	0.671419	0.292049	0.109921
2849	0.565719	0.542722	0.810015	0.684	0.650614	0.122979	0.0108026
2850	0.477429	0.69835	0.824217	0.738055	0.684513	0.147715	0.0235523
2851	2.0665	2.16033	2.58805	2.60451	2.35485	0.281484	0.00237931
2856	1.73261	1.60568	1.71285	1.16422	1.55384	0.265665	0.0251121
2863	1.15495	1.10925	1.05179	1.05045	1.09161	0.0503397	0.0357505
2864	1.3147	1.30853	1.38368	1.16454	1.29286	0.0920825	0.00786252
2865	0.733882	1.01359	0.790097	1.01657	0.888535	0.147919	0.228884
2868	1.21807	0.989879	1.19674	0.963731	1.09211	0.133849	0.262476
2869	1.22456	1.15747	1.35763	1.38011	1.27994	0.106668	0.0134663
2872	0.5163	0.556753	0.637982	0.520079	0.557779	0.0564957	0.000566454
2873	0.959671	1.18724	1.66758	1.69198	1.37662	0.362315	0.129133
2874	1.35837	1.14382	1.19398	1.40173	1.27447	0.124877	0.0218172
2875	0.686005	0.597448	0.69693	0.719024	0.674852	0.0533989	0.00119204
2880	1.32676	1.60602	1.63567	1.67386	1.56058	0.158331	0.00579212

## Sheet: mix-7
Supplementary Table 4. BI measurement of compounds in mix-7 from four individual MS affinity assays
Hits are in bold red with mean BI >2.0 and p <0.05
Cpd ID	BI-1	BI-2	BI-3	BI-4	Mean	s.d.	p-value
2886	0.920794	0.933872	0.74775	0.677661	0.820019	0.127288	0.0663023
2888	1.38326	2.99873	1.23717	1.00651	1.65642	0.908214	0.244077
2891	0.717669	0.703386	0.83755	0.713786	0.743097	0.0632563	0.00390107
2894	0.939665	1.00456	0.891092	0.890618	0.931483	0.0538772	0.0844251
2895	0.80906	0.686019	0.684746	0.740024	0.729962	0.0586891	0.00271406
2897	0.806072	0.802905	0.823577	0.748388	0.795235	0.0325281	0.00108048
2898	0.899924	0.766463	0.74617	0.761327	0.793471	0.0714896	0.0103088
2899	0.681819	0.545276	0.982092	0.62004	0.707307	0.191508	0.0551353
2901	1.11207	1.03349	0.928144	1.17421	1.06198	0.106187	0.327426
2903	0.578292	0.570213	0.510255	0.661608	0.580092	0.0622441	0.000880419
2905	1.20873	1.11594	1.12592	1.12139	1.14299	0.0440114	0.00740081
2907	1.00388	0.899965	0.887238	0.87323	0.916079	0.0595461	0.0668115
2909	0.596564	0.620833	0.829112	0.664294	0.677701	0.104757	0.00863628
2911	0.566139	0.38005	0.749576	0.365746	0.515378	0.180858	0.0127133
2912	1.09594	1.7942	0.81552	1.94164	1.41182	0.542301	0.22612
2913	0.634758	0.528281	0.751872	0.665445	0.645089	0.0923181	0.00457141
2916	0.757256	0.515499	0.561222	0.543943	0.59448	0.110142	0.00517724
2918	0.676873	0.246329	0.736447	0.635827	0.573869	0.222233	0.031255
2919	0.819859	0.55388	0.777245	0.521264	0.668062	0.152261	0.0222995
2920	0.891994	0.603033	0.793808	0.798474	0.771827	0.121278	0.0328268
2921	0.534515	0.621704	0.748923	0.692756	0.649474	0.0926468	0.00478695
2922	1.21151	1.17016	1.04827	1.05085	1.1202	0.0832966	0.0632187
2923	1.13959	1.05878	1.04366	1.15966	1.10042	0.0577335	0.0400894
2926	1.04423	0.893667	0.983889	0.892389	0.953544	0.0740961	0.298684
2927	0.663106	0.576702	0.737327	0.706122	0.670814	0.0697309	0.00251806
2929	0.952002	1.06619	0.915455	0.869033	0.95067	0.0841647	0.325721
2930	0.928159	1.59562	0.850454	0.65495	1.0073	0.408712	0.973763
2931	0.55037	0.522842	0.640106	0.600813	0.578533	0.0522247	0.000517306
2934	0.431135	0.529543	0.602	0.734127	0.574201	0.127556	0.00685263
2936	0.98743	0.543502	0.721304	0.689158	0.735349	0.185005	0.0645233
2938	0.643294	0.54409	0.81991	0.728879	0.684043	0.117923	0.0127162
2939	0.832666	0.844795	0.957223	0.807492	0.860544	0.0662984	0.024525
2940	0.658002	0.610417	0.871243	0.641784	0.695361	0.118906	0.0143906
2943	0.695689	0.5997	0.792454	0.803231	0.722768	0.0952354	0.0100912
2944	0.546234	0.49053	0.676976	0.587803	0.575385	0.0785813	0.00169483
2945	0.936491	0.859402	0.965775	0.812607	0.893569	0.0701861	0.056185
2946	1.19518	1.11098	0.643701	1.39865	1.08713	0.319333	0.623232
2947	1.432	1.61283	1.2985	1.58821	1.48288	0.146702	0.0071321
2948	1.21565	0.966397	0.999517	1.24142	1.10574	0.142814	0.235226
2950	0.817034	0.864397	0.841253	0.689502	0.803046	0.0781272	0.0150443
2951	1.12097	1.14796	1.02334	1.17144	1.11593	0.065078	0.0377474
2952	0.821512	0.772792	0.930351	0.720701	0.811339	0.0893838	0.024303
2953	0.951835	0.563671	0.736879	0.642009	0.723599	0.167831	0.0459467
2959	0.697639	0.651744	0.989776	0.782463	0.780406	0.149716	0.060829
2961	0.658728	0.540976	0.498838	0.615498	0.57851	0.0720174	0.00133979
2962	0.741456	1.09803	0.795622	0.899301	0.883603	0.15724	0.235318
2963	0.750488	0.648681	0.571742	0.868157	0.709767	0.128489	0.0202759
2966	0.988489	0.867196	0.821291	0.73892	0.853974	0.104203	0.0676997
2971	0.693268	0.637616	0.70581	0.686486	0.680795	0.029878	0.000224292
2972	1.32587	1.3222	1.1436	1.49687	1.32213	0.144246	0.0209065
2973	0.192113	0.905045	1.03068	0.987543	0.778846	0.394613	0.343979
2978	0.764468	0.80089	0.689192	0.835591	0.772535	0.0626928	0.00539969
2982	0.646437	0.20436	0.620207	0.548608	0.504903	0.204583	0.016823
2985	0.659862	0.597758	0.830629	0.589113	0.66934	0.112048	0.00971175
2986	0.745004	0.576384	0.694762	0.694765	0.677729	0.0715939	0.00289323
2987	1.06475	0.466818	0.743227	0.507647	0.695609	0.274593	0.113356
2994	0.847051	0.694272	0.733022	0.90637	0.795179	0.0984881	0.0252747
2998	0.504213	0.393938	0.727824	0.517145	0.53578	0.139456	0.00690756
2999	0.678241	0.527057	0.651318	0.665125	0.630435	0.0697901	0.00179856
3000	2.04545	1.37911	1.46042	1.52043	1.60135	0.301676	0.0282527
3003	0.825649	0.829785	0.741437	0.822331	0.804801	0.0423523	0.00270069
3005	1.35569	1.27552	1.15027	1.39499	1.29412	0.108018	0.0121604
3008	1.21713	1.28036	1.25927	1.1876	1.23609	0.0416652	0.00147376
3009	0.697045	0.929627	0.945436	0.80415	0.844065	0.116626	0.0754266
3010	1.30857	1.25151	1.13067	1.36349	1.26356	0.099692	0.013196
3011	1.07406	1.76829	1.41737	1.86509	1.5312	0.360385	0.0601223
3013	1.41228	1.32363	1.11773	1.51491	1.34214	0.16879	0.0270407
3015	0.934846	0.91895	1.19176	0.945685	0.997811	0.129767	0.975207
3016	0.988659	1.06518	0.97526	0.958715	0.996954	0.0471048	0.905273
3017	0.550225	0.702215	0.677572	0.652134	0.645536	0.0667493	0.00178368
3018	1.31046	1.15093	1.28168	1.54103	1.32102	0.162272	0.0288186
3022	2.40438	2.5137	1.61383	2.08297	2.15372	0.40369	0.0106249
3023	0.864863	0.772086	0.810022	0.764788	0.80294	0.0457974	0.00329903
3025	0.797852	0.707046	0.698214	0.696411	0.724881	0.0488686	0.00150214
3026	1.94084	1.62877	1.58093	1.52468	1.66881	0.186282	0.00556504
3027	0.95399	1.04817	0.86709	0.850094	0.929837	0.0910739	0.221017
3028	0.463903	0.446222	0.620065	0.386641	0.479208	0.0995518	0.00186395
3029	0.645938	0.638976	0.782533	0.616836	0.67107	0.075337	0.00316202
3030	0.934981	1.89512	0.89441	1.6499	1.3436	0.505548	0.267199
3031	0.416751	0.353134	0.58134	0.370273	0.430375	0.10417	0.00163652
3032	1.3172	1.28378	1.20504	1.37542	1.29536	0.0711308	0.00365832
3035	1.30857	1.25151	1.13067	1.36349	1.26356	0.099692	0.013196
3039	0.491214	0.601532	0.675418	0.552741	0.580226	0.0778759	0.00170707
3041	0.614482	0.89251	0.774516	0.580561	0.715517	0.145177	0.0295425
3042	1.77115	1.63355	1.29312	1.69988	1.59943	0.211792	0.0109177
3047	0.542053	0.469866	0.745257	0.662136	0.604828	0.122692	0.00758613
3049	1.45706	1.40675	1.30003	1.31285	1.36917	0.0754761	0.00226996
3050	1.13339	1.00893	0.946659	1.02702	1.029	0.0776394	0.50924
3052	1.20746	1.26449	0.855474	2.62116	1.48715	0.777347	0.298864
3053	0.520881	0.814158	0.930063	0.51224	0.694336	0.210689	0.0624229
3054	1.75195	1.55988	1.45996	1.89224	1.66601	0.193467	0.00627665
3055	0.418275	0.325978	0.318209	0.263156	0.331405	0.0643115	0.000243306
3056	1.12721	1.03431	0.931843	1.17046	1.06595	0.105924	0.30143
3057	0.743711	0.610677	0.673544	0.741666	0.6924	0.0634933	0.00233451
3059	1.01405	1.01873	1.00206	1.00765	1.01062	0.00729433	0.0618583
3060	0.428965	0.61917	0.934703	1.08159	0.766108	0.296204	0.212396
3061	1.2511	1.18261	1.08447	1.18174	1.17498	0.0685308	0.0145258
3062	0.846411	0.60154	0.869888	0.658999	0.744209	0.133984	0.0316115
3068	1.65901	1.22376	0.993344	2.17873	1.51371	0.522246	0.143822
3071	0.615581	0.486168	0.677509	0.749522	0.632195	0.111682	0.00712143
3072	0.98503	0.834548	1.02978	1.00633	0.963922	0.0881641	0.473066
3073	1.2364	1.13724	1.15394	1.13313	1.16518	0.048327	0.0064063
3075	0.511753	0.528137	0.745673	0.718818	0.626095	0.123243	0.0089839
3095	0.767502	0.752702	0.687073	0.968554	0.793958	0.121532	0.0427516
3096	0.837315	0.816071	1.05568	0.700531	0.8524	0.148251	0.140516
3097	0.773221	0.816369	1.07502	0.731963	0.849143	0.154476	0.145824
3102	1.09993	1.3633	2.15538	1.12005	1.43467	0.49516	0.17741
3104	0.949433	0.505315	0.805671	1.05158	0.828	0.237598	0.243488
3108	1.01719	1.12342	1.46661	1.47555	1.27069	0.235445	0.105046
3112	0.866715	1.45575	2.88857	2.67151	1.97064	0.96912	0.138904
3113	0.939309	1.06432	1.07961	1.03853	1.03044	0.0630757	0.405618
3120	0.865098	1.04413	0.971552	1.16589	1.01167	0.126399	0.865302
3121	0.600057	0.456218	0.793693	0.551211	0.600295	0.142092	0.0111059
3123	0.511676	0.42992	0.722662	0.565636	0.557473	0.123452	0.00559039
3127	0.629451	0.664009	0.800194	0.808221	0.725469	0.0920659	0.00943198
3129	1.28043	1.16262	1.20141	1.28705	1.23287	0.06089	0.00464041
3130	0.739642	0.55562	0.616958	0.782141	0.67359	0.10531	0.0084574
3136	0.675333	0.617247	0.616342	0.709474	0.654599	0.0458254	0.000633712
3138	0.913038	0.93063	0.963242	0.827492	0.908601	0.0579346	0.0510577
3141	0.527105	0.576073	0.664716	0.577422	0.586329	0.0572611	0.000718713
3143	1.36698	1.3332	1.09519	1.37513	1.29263	0.132869	0.0217002
3144	0.98503	0.834548	1.02978	1.00633	0.963922	0.0881641	0.473066
3145	0.560868	0.378313	0.701429	0.595357	0.558992	0.134486	0.00720879
3147	1.97948	1.80773	1.69699	1.88345	1.84191	0.119472	0.000773678
3148	0.491214	0.601532	0.675418	0.552741	0.580226	0.0778759	0.00170707
3153	0.95399	1.04817	0.86709	0.850094	0.929837	0.0910739	0.221017
3154	1.2511	1.18261	1.08447	1.18174	1.17498	0.0685308	0.0145258
3156	1.249	1.22993	1.25341	1.51777	1.31253	0.137207	0.0198246
3159	1.10436	1.61487	0.769259	0.837305	1.08145	0.383898	0.699921
3171	0.831446	0.665878	0.837261	0.614293	0.73722	0.114145	0.0192637
3172	0.621725	0.507424	0.617282	0.565139	0.577893	0.0535452	0.000554651
3174	0.923506	0.935044	0.989431	0.828133	0.919028	0.0670694	0.0946289
3176	0.547897	0.521073	0.620558	0.755652	0.611295	0.105014	0.00509856
3178	0.761934	0.765987	0.789727	0.784219	0.775467	0.0135763	6.07375e-05
3191	1.4068	1.32137	1.29366	1.61113	1.40824	0.143576	0.0107778
3194	0.221487	0.560566	0.536267	0.803596	0.530479	0.238752	0.0292693
3195	0.626038	0.478393	0.58181	0.623503	0.577436	0.0690724	0.00117563
3196	0.845127	0.742258	0.695548	0.822384	0.776329	0.0696193	0.00764036
3209	0.902809	0.938381	0.974367	0.865382	0.920235	0.0468049	0.0421995
3213	0.655252	0.638401	0.647916	0.718092	0.664915	0.0361163	0.00034159
3214	0.805056	0.831166	0.75882	0.793288	0.797083	0.0300206	0.00087537
3215	0.336249	0.676101	0.622946	0.714925	0.587555	0.171728	0.0171742
3216	0.679705	0.634227	0.662249	0.698386	0.668641	0.0272786	0.000152866
3217	0.482382	0.53214	0.815131	0.722156	0.637952	0.15693	0.0191532
3218	0.848724	0.943317	0.943331	1.01048	0.936464	0.066511	0.152043
3220	1.17486	1.20728	0.929854	1.08571	1.09943	0.124185	0.207634
3221	1.01905	1.05374	0.967346	0.921785	0.990479	0.0579417	0.764029
3222	1.29188	1.37656	1.1287	1.26329	1.26511	0.102875	0.014161
3225	0.753062	0.819529	0.910909	0.563072	0.761643	0.147349	0.048023
3226	1.47827	1.25352	1.19919	1.76822	1.4248	0.258864	0.0463552
3227	0.896296	0.871593	0.911901	0.859141	0.884733	0.0238005	0.00233668
3228	1.17425	1.12632	1.14739	1.11237	1.14008	0.0269451	0.00189842
3229	0.669873	0.800854	0.764721	0.619707	0.713789	0.0835751	0.00637072
3231	0.499514	0.439621	0.641221	0.625148	0.551376	0.0977978	0.0027381
3232	1.4471	1.30635	1.30429	1.29569	1.33836	0.0726422	0.00261869
3233	0.854065	0.403378	1.01668	0.785801	0.764982	0.259795	0.168116
3235	1.02152	1.29623	0.96492	1.24421	1.13172	0.162974	0.204417
3236	1.30017	1.23236	1.58894	1.54259	1.41601	0.176135	0.017973
3237	0.675666	0.801079	0.857167	0.808516	0.785607	0.0773996	0.0115939
3238	1.35674	1.20775	1.16607	1.51437	1.31123	0.158238	0.0292572
3239	1.78067	1.70661	1.64273	2.04497	1.79374	0.176715	0.00291152
3240	1.04682	1.10959	0.908403	0.910841	0.993913	0.100652	0.911377
3242	0.778796	0.830029	0.761628	0.84002	0.802618	0.0382878	0.00194593
3243	2.16178	1.86668	1.55287	1.77705	1.83959	0.252098	0.0068979
3244	0.915746	0.974867	0.871954	1.03378	0.949088	0.0704724	0.244238
3246	0.655528	0.501658	0.684837	0.600102	0.610531	0.0806394	0.00235558
3247	0.581192	0.49121	0.761995	0.850044	0.67111	0.164039	0.027828
3248	1.19434	1.12505	1.34852	0.750662	1.10464	0.253798	0.470038
3249	1.11657	1.28134	1.09468	0.940971	1.10839	0.139278	0.217467
3250	0.596358	0.427741	0.535104	0.403176	0.490595	0.0908472	0.00151996
3251	0.4634	0.777095	0.903313	0.878624	0.755608	0.202317	0.0945131
3252	0.695665	0.538018	0.580532	0.603376	0.604398	0.0665996	0.00128248
3253	0.240723	0.522296	0.894989	1.05225	0.677563	0.366332	0.176573
3254	1.17551	1.04291	0.909531	0.950679	1.01966	0.117922	0.760777
3255	0.176372	0.744897	0.767094	0.760672	0.612259	0.290741	0.0758673
3256	0.799768	0.799432	0.735378	0.729276	0.765963	0.0389202	0.00123694
3257	1.18263	1.35583	0.994946	0.948787	1.12055	0.186629	0.286928
3258	1.17634	1.17775	1.03205	1.12155	1.12692	0.068445	0.0340715
3259	1.4471	1.30635	1.30429	1.29569	1.33836	0.0726422	0.00261869
3261	1.79977	1.79943	1.73538	1.72928	1.76596	0.0389202	0.00128248
3263	0.550585	0.570821	0.569757	0.751797	0.61074	0.0944966	0.00374405
3264	1.3185	1.11102	1.08705	1.03653	1.13828	0.124096	0.112147
3265	0.612793	0.738938	0.928306	0.86882	0.787214	0.140617	0.0564695
3266	0.663219	0.501206	0.790056	0.430455	0.596234	0.16183	0.0154772
3267	0.660846	0.527089	0.736123	0.650206	0.643566	0.0865568	0.00374769
3269	1.23775	1.25279	1.22556	1.44634	1.29061	0.104414	0.0114405
3270	2.0122	1.68702	1.57794	1.89223	1.79235	0.196106	0.00395975
3271	0.646656	0.446809	0.594695	0.683926	0.593021	0.104117	0.00435737
3273	0.780455	0.672071	0.772008	0.658536	0.720767	0.0643749	0.00322283
3274	0.872667	0.939777	0.927135	0.949578	0.922289	0.0343333	0.0201652
3275	1.34708	1.11281	1.16278	1.39884	1.25538	0.138912	0.034835
3276	0.798138	0.84327	0.811714	0.83381	0.821733	0.0205493	0.000417244
3278	0.921096	0.24162	1.00416	0.995083	0.79049	0.3678	0.337326
3279	2.53787	2.52644	2.26548	2.77531	2.52627	0.2083	0.000689157
3280	0.601223	0.520926	0.707343	0.57143	0.60023	0.0787247	0.00203391
3281	1.38271	1.30371	1.1537	1.402	1.31053	0.112869	0.0118148
3282	1.32781	1.2881	1.30955	1.38427	1.32743	0.041222	0.000542298
3285	2.007	2.02782	1.87863	1.2575	1.79273	0.362872	0.0221755
3286	2.66245	2.04596	1.77464	2.30107	2.19603	0.378006	0.00797851
3287	0.971411	1.01846	0.988429	1.06203	1.01008	0.0397213	0.646671
3288	0.941106	1.07797	0.922846	0.965196	0.97678	0.069655	0.552646
3289	1.19023	1.14626	1.22748	1.16703	1.18275	0.0348113	0.00184493
3290	0.916339	1.05932	1.03346	0.901668	0.977697	0.0802443	0.617065
3292	0.957881	1.05034	0.862815	0.877836	0.937218	0.0861893	0.241204
3294	0.976964	0.909428	0.863484	0.971532	0.930352	0.0540914	0.082121
3298	1.0435	1.08343	1.01665	0.972693	1.02907	0.0465328	0.300138
3304	1.02936	0.92194	1.01818	0.973935	0.985854	0.0488707	0.603259
3305	0.869221	0.866202	1.11366	1.00951	0.964648	0.119743	0.596407
3306	1.83025	1.5763	1.82226	1.46837	1.67429	0.180946	0.00500063
3307	1.35302	1.03897	1.40374	1.38898	1.29618	0.172791	0.0415943
3309	0.824358	0.880142	0.882707	0.72882	0.829006	0.0720127	0.0177154
3311	1.37463	1.54259	1.23209	1.5388	1.42203	0.148878	0.0108699
3312	0.762169	0.601721	0.85025	0.461725	0.668966	0.172261	0.0310781
3317	0.796006	1.27888	1.14935	1.03924	1.06587	0.204841	0.56591
3318	0.813544	0.824773	0.874716	0.78088	0.823478	0.0389031	0.00282666
3319	0.766589	0.595158	0.779647	0.612119	0.688378	0.0982387	0.00792141
3321	0.934991	0.710266	0.944317	1.0187	0.902068	0.133241	0.23791
3322	0.699109	0.623222	0.680081	0.578479	0.645223	0.0549474	0.00100244
3323	0.868009	1.21486	1.28109	0.814443	1.0446	0.237395	0.732109
3325	1.3714	1.3308	1.23385	1.29119	1.30681	0.0586387	0.00186303
3326	0.876815	0.877214	1.16816	0.669782	0.897993	0.204899	0.392793
3327	1.3758	1.24299	1.26487	1.23053	1.27855	0.0663663	0.00354619
3328	1.41681	1.26175	1.31923	1.36931	1.34178	0.0665828	0.00197062
3330	1.21245	1.24802	1.07081	1.21778	1.18726	0.0791982	0.0179193
3331	0.7341	0.66083	0.676252	0.648047	0.679807	0.0379874	0.00045456
3332	1.72609	1.49045	1.58941	1.68545	1.62285	0.105238	0.00129627
3334	1.16239	1.00223	1.05404	1.19494	1.1034	0.090429	0.106265
3336	1.26389	0.333998	1.401	1.44748	1.11159	0.524221	0.698992
3339	0.61609	0.699769	0.856619	0.612187	0.696166	0.114343	0.0130118
3340	1.68253	1.56346	1.44644	0.907792	1.40006	0.342038	0.10129
3341	1.45741	1.26995	1.1477	1.50598	1.34526	0.166443	0.0254456
3342	1.65225	1.56769	1.24379	1.49159	1.48883	0.176045	0.0115155
3343	0.757595	0.668423	0.757879	0.785043	0.742235	0.0508641	0.00204611
3345	0.933415	1.01219	1.06571	0.844094	0.963852	0.0965742	0.508437
3346	1.42188	1.32279	1.10385	1.47769	1.33155	0.164765	0.0275628
3348	1.1441	1.12518	1.29547	0.821072	1.09645	0.198778	0.403392
3349	0.634562	0.567034	0.683819	0.740868	0.656571	0.0738234	0.00262832
3350	1.35985	1.29197	1.19059	1.37335	1.30394	0.0835389	0.00535683
3354	0.360414	0.7597	0.832926	0.711322	0.666091	0.209826	0.0499893
3356	0.089734	0.502629	0.642562	0.540912	0.443959	0.24342	0.019673

## Sheet: mix-8
Supplementary Table 4. BI measurement of compounds in mix-8 from four individual MS affinity assays
Hits are in bold red with mean BI >2.0 and p <0.05
Cpd ID	BI-1	BI-2	BI-3	BI-4	Mean	s.d.	p-value
3361	0.680107	0.560359	0.708449	0.701006	0.66248	0.06913	0.00228204
3362	1.14182	1.1406	0.948014	0.940159	1.04265	0.113856	0.508148
3363	0.92455	0.972542	1.05065	0.884599	0.958086	0.0714201	0.325203
3365	0.741071	0.702141	0.74423	0.817148	0.751148	0.0479828	0.00191191
3366	1.31138	1.37783	1.36402	1.20599	1.31481	0.0779866	0.00397033
3367	0.512548	0.768292	1.10112	0.993631	0.843897	0.260825	0.317272
3368	0.951337	0.749339	0.806113	1.03382	0.885152	0.130608	0.176873
3370	1.20523	1.13939	1.08747	1.16531	1.14935	0.0493482	0.00904655
3371	1.105	1.08047	1.01375	0.973586	1.0432	0.0603386	0.247562
3373	2.05407	1.86446	1.37503	1.47661	1.69254	0.32026	0.0227873
3374	0.61213	0.77409	0.992842	0.825143	0.801051	0.156825	0.0848862
3375	1.10487	1.06267	0.958248	1.11195	1.05943	0.0708791	0.192125
3376	1.17695	1.11677	0.971882	0.979265	1.06122	0.101944	0.315927
3377	0.790598	0.811977	0.782383	1.01788	0.85071	0.112143	0.076176
3378	1.57456	1.22277	1.23974	1.53654	1.3934	0.188003	0.0248657
3379	0.695312	0.647641	0.877245	0.707009	0.731802	0.100305	0.0127891
3380	0.470297	0.644567	0.881309	0.782688	0.694715	0.178358	0.0417427
3382	1.30864	1.22032	1.09126	1.14711	1.19183	0.0941111	0.0266472
3383	0.463202	0.509123	0.754139	0.727235	0.613425	0.148548	0.013784
3384	0.68317	0.762608	1.5143	0.982886	0.985741	0.374487	0.944094
3385	1.67756	1.66648	1.64341	1.93083	1.72957	0.134927	0.00169147
3387	1.23454	1.31741	1.09002	1.36833	1.25257	0.121592	0.0253526
3388	2.3753	1.75492	1.02868	2.06871	1.8069	0.577334	0.0681201
3390	1.94676	1.63136	1.45954	1.63264	1.66757	0.203104	0.0071614
3391	0.529973	0.677387	0.760801	0.729034	0.674299	0.102173	0.00781167
3392	1.28784	0.840251	0.909211	0.94941	0.996679	0.199275	0.975503
3393	0.904179	0.804111	0.845919	1.29101	0.961305	0.223602	0.752116
3394	0.593375	0.576131	0.684006	0.741344	0.648714	0.077796	0.00286698
3397	0.24727	0.484113	0.65098	0.63863	0.505248	0.187996	0.0133637
3398	0.671008	0.689542	0.693241	0.926971	0.745191	0.121577	0.0247607
3399	1.18972	1.11584	1.12182	1.31244	1.18496	0.091357	0.0271275
3400	1.29532	1.18111	1.06282	1.05149	1.14769	0.114556	0.0818928
3401	0.722104	0.627598	0.845923	0.71586	0.727871	0.0897561	0.00900082
3402	0.592064	0.683038	0.665039	0.802624	0.685691	0.0873172	0.00552381
3404	0.862471	0.900069	0.692698	0.845015	0.825063	0.0911843	0.0312127
3409	0.590513	0.735181	0.798324	0.68152	0.701384	0.0879897	0.00653737
3410	1.14362	1.12556	0.816485	1.06176	1.03686	0.151053	0.65899
3411	1.44648	1.0756	1.44487	1.74411	1.42776	0.2737	0.0522363
3412	1.09821	1.10719	0.979775	1.07822	1.06585	0.0586463	0.110383
3413	0.627742	0.644719	0.51099	0.859385	0.660709	0.145178	0.0184954
3417	0.733393	0.788651	0.829016	0.81157	0.790658	0.0416014	0.00208886
3418	0.614207	0.629883	0.701085	0.651019	0.649049	0.0378284	0.000341641
3421	0.422014	0.830359	0.786436	0.773026	0.702959	0.18889	0.0514591
3422	0.856714	1.03891	0.891891	0.898356	0.921468	0.0804056	0.145791
3423	1.46404	0.629105	0.751629	0.660904	0.876418	0.39517	0.576017
3424	1.38037	1.27269	1.34319	1.3328	1.33226	0.0446552	0.000658473
3426	1.06479	1.0811	1.02573	1.16062	1.08306	0.0566868	0.0609797
3428	0.678473	0.575958	0.765159	0.739663	0.689813	0.0841695	0.00516319
3429	0.947249	1.18571	1.11429	1.07324	1.08012	0.100033	0.207492
3430	0.618753	0.542006	0.674256	0.74706	0.645519	0.0867329	0.00383031
3431	0.654759	0.790957	0.862273	0.896651	0.80116	0.107068	0.0339412
3432	1.03754	0.81185	1.00992	1.13181	0.997782	0.13449	0.97576
3434	0.577383	0.89772	0.739625	0.721184	0.733978	0.131058	0.0269431
3436	1.44761	1.33412	1.22017	1.42226	1.35604	0.102812	0.00617079
3437	0.77702	0.832239	0.897618	0.856175	0.840763	0.0503513	0.00798949
3438	0.632721	0.732441	0.681318	0.74245	0.697233	0.0506598	0.00125953
3442	0.797248	0.624222	0.570929	0.750306	0.685676	0.105781	0.00952546
3443	0.753293	0.901248	0.936986	0.900727	0.873064	0.0816306	0.0528807
3444	0.142999	0.606019	0.756034	0.607394	0.528112	0.266218	0.0382234
3447	0.615735	0.630394	0.74386	0.633143	0.655783	0.0592131	0.00136675
3449	0.707684	0.597034	0.738017	0.644725	0.671865	0.0632332	0.00190867
3450	0.898797	0.866926	0.96374	1.01767	0.936784	0.0673111	0.156953
3451	0.901366	0.813955	1.64803	0.906812	1.06754	0.389324	0.751531
3453	1.01977	0.84109	0.976077	0.974687	0.952907	0.0774285	0.310801
3455	0.562334	0.700924	0.622621	0.688005	0.643471	0.0640367	0.00155208
3456	0.870668	0.944767	0.948388	0.968707	0.933132	0.0429554	0.0527438
3457	0.870668	0.944767	0.948388	0.968707	0.933132	0.0429554	0.0527438
3461	1.23634	1.09	1.0623	1.06377	1.1131	0.0831359	0.0724964
3463	0.591035	0.516137	0.608774	0.595152	0.577775	0.0417854	0.000264853
3465	0.838604	0.962459	0.937773	0.853573	0.898102	0.061206	0.0447305
3467	0.479494	0.670769	0.645216	0.561555	0.589259	0.0867774	0.00249873
3469	1.24056	1.18117	1.06351	1.54555	1.2577	0.205523	0.0871127
3470	1.25897	1.26692	1.06812	1.14224	1.18406	0.0960347	0.0312921
3471	0.824454	0.79777	1.01256	1.01226	0.911761	0.116729	0.227759
3475	0.953769	0.669161	0.770764	0.917027	0.82768	0.131971	0.0795834
3479	0.535837	0.763407	0.668966	0.763446	0.682914	0.107689	0.00977284
3480	1.08527	0.557432	0.725638	0.731256	0.774899	0.222076	0.135704
3481	0.823117	0.543528	0.526253	0.751114	0.661003	0.148726	0.0197885
3484	0.628754	1.14058	1.42277	0.839717	1.00796	0.347256	0.96633
3486	0.936282	1.02394	1.07335	0.980328	1.00348	0.0587436	0.913272
3487	0.610564	0.732885	0.831861	0.987817	0.790782	0.159521	0.0787924
3492	1.04573	1.23207	1.16425	1.08957	1.1329	0.0822488	0.0481507
3495	0.759736	0.83526	0.758932	0.777171	0.782775	0.0359878	0.00122318
3496	0.673467	0.679597	0.696333	0.949381	0.749694	0.133475	0.0331025
3501	1.88327	1.66814	0.814295	1.72264	1.52209	0.480616	0.11817
3503	1.30739	1.26535	1.15666	1.22985	1.23981	0.0638564	0.00489036
3505	0.429764	0.58644	0.80108	0.660448	0.619433	0.15464	0.0160697
3508	0.605215	0.580105	0.817096	0.723997	0.681603	0.109989	0.0102504
3509	1.16712	1.22502	1.2107	1.51871	1.28039	0.16078	0.0398285
3510	0.973708	0.993667	0.934728	0.92857	0.957668	0.031231	0.0731103
3511	0.281075	0.347262	0.329087	0.210712	0.292034	0.0609821	0.000175009
3512	0.691165	0.652377	0.728998	0.902941	0.74387	0.110565	0.0189417
3513	0.928199	1.01264	1.16865	1.22179	1.08282	0.13603	0.310393
3514	0.869	0.83448	0.838889	0.733964	0.819083	0.058783	0.00862785
3515	0.567384	0.627035	0.60396	0.757705	0.639021	0.0828464	0.00318085
3516	0.810179	0.730693	0.672137	0.363565	0.644143	0.19542	0.0356923
3517	1.16719	1.18903	1.24312	1.27574	1.21877	0.0496103	0.00307184
3518	1.15912	1.14161	1.13934	1.20539	1.16137	0.0306542	0.00183018
3519	0.904294	0.787965	0.814123	0.793973	0.825089	0.0539759	0.00745593
3520	1.31691	1.16325	1.26636	1.12273	1.21731	0.089805	0.0168267
3523	0.616965	0.642785	0.815248	0.784804	0.714951	0.0995793	0.0105772
3524	1.04539	0.924744	0.906398	0.915619	0.948037	0.0653321	0.209901
3525	1.37127	1.11088	1.20366	0.998994	1.1712	0.157453	0.117941
3526	0.736674	0.989711	1.00095	0.950172	0.919377	0.123734	0.283518
3527	1.57959	1.42975	1.43093	1.35902	1.44982	0.0928166	0.00233205
3528	0.782691	0.743985	0.622658	0.818344	0.741919	0.0851089	0.00899675
3529	0.862765	0.898501	1.02268	1.10256	0.971625	0.110976	0.644348
3530	0.753016	0.732105	0.624215	0.825517	0.733713	0.0832524	0.00773709
3531	0.616089	0.705041	0.825754	0.673598	0.705121	0.088455	0.00687884
3532	1.04165	0.860377	0.980717	0.943804	0.956636	0.0758	0.335572
3533	1.01953	1.45727	1.38628	1.0851	1.23704	0.216924	0.116745
3534	1.47633	1.33016	1.25119	1.3814	1.35977	0.0943769	0.00468436
3535	1.0081	1.71914	1.7461	1.07863	1.38799	0.399134	0.147111
3537	0.880056	0.749683	0.857571	0.795984	0.820823	0.0592642	0.00907246
3538	0.721562	0.80892	0.840033	0.901725	0.81806	0.0750068	0.0167171
3539	1.05608	1.03535	0.965138	1.00259	1.01479	0.0397558	0.510887
3540	1.34582	1.11266	1.12314	1.05579	1.15935	0.127785	0.0881689
3541	0.461007	0.573743	0.78645	0.809308	0.657627	0.16862	0.0269208
3542	1.88384	1.48537	1.2022	1.48465	1.51401	0.280285	0.0350537
3544	1.32436	1.22319	1.12031	1.25025	1.22953	0.0844428	0.0122187
3546	1.00622	0.777476	0.565966	0.621299	0.74274	0.197167	0.0797148
3548	0.520332	0.684061	0.614752	0.799178	0.654581	0.117454	0.00980632
3549	0.537337	0.611483	0.627992	0.544512	0.580331	0.0460923	0.000361286
3550	0.646705	0.755194	0.63924	0.814852	0.713998	0.0856069	0.00683664
3551	1.21169	1.32962	1.11297	1.22989	1.22104	0.088759	0.0155562
3552	1.54412	1.60584	1.22404	1.46162	1.45891	0.167352	0.0119239
3553	0.482562	0.609114	0.703118	0.686058	0.620213	0.100465	0.00479855
3554	1.36737	0.886355	0.884782	0.94624	1.02119	0.232553	0.867042
3555	1.13384	1.0304	0.992601	0.988533	1.03634	0.0676765	0.361516
3557	0.671042	0.681783	0.749857	0.79341	0.724023	0.057946	0.00245393
3558	0.978986	1.16626	1.2097	0.914	1.06724	0.143028	0.416481
3559	0.759997	0.63024	0.602649	0.681278	0.668541	0.0691257	0.00240583
3560	0.740759	0.773758	0.820726	0.793729	0.782243	0.0336939	0.000999631
3561	1.31825	1.08108	1.07882	1.28235	1.19013	0.128063	0.0591032
3562	1.18746	1.13009	1.28751	1.47753	1.27065	0.152488	0.0380978
3563	1.34727	1.15052	1.2262	1.18441	1.2271	0.0858843	0.0131888
3565	1.07371	1.126	1.05858	0.973204	1.05787	0.0634059	0.165418
3566	1.27575	1.10813	0.994025	0.983812	1.09043	0.135791	0.27505
3567	0.99083	0.883725	0.708969	0.959725	0.885812	0.126187	0.168022
3569	0.998198	1.15002	1.06317	0.927962	1.03484	0.0945768	0.51469
3570	0.373102	0.607158	0.500398	0.489119	0.492444	0.095701	0.00179042
3571	1.124	1.0899	1.05804	0.960786	1.05818	0.0702958	0.19643
3572	1.09372	1.03547	1.00214	0.972075	1.02585	0.0521316	0.394423
3573	0.561437	0.620038	0.585851	0.764346	0.632918	0.0908557	0.00396011
3576	1.43823	1.36334	1.14595	1.4016	1.33728	0.13117	0.0142475
3577	1.60324	0.759622	0.78506	0.730839	0.969691	0.422948	0.895121
3578	0.924631	0.916755	1.06626	1.03205	0.984924	0.075539	0.716493
3579	0.915214	0.7306	1.15429	1.18225	0.99559	0.213471	0.969636
3581	1.15275	0.94955	0.903853	0.845385	0.962885	0.133564	0.617129
3582	2.14814	1.76348	1.61339	1.66737	1.79809	0.241477	0.00704975
3583	0.581659	0.645653	0.707902	0.741097	0.669078	0.070439	0.00255394
3584	1.09933	1.06852	1.02928	1.10395	1.07527	0.0344561	0.0221765
3585	0.77199	0.716007	0.941571	1.01761	0.861794	0.141376	0.145538
3587	1.57707	1.42886	1.35357	1.60885	1.49209	0.121163	0.00390081
3588	1.05313	1.02081	0.860258	1.0934	1.0069	0.102172	0.901099
3589	0.548647	0.897748	0.757961	0.898197	0.775638	0.165095	0.0726739
3590	0.473282	0.681685	0.762618	0.816558	0.683536	0.15073	0.0246465
3592	0.419435	0.618288	0.764739	0.766948	0.642353	0.164087	0.0223114
3593	1.35894	1.24226	1.14313	1.24976	1.24852	0.0882058	0.0110561
3594	0.876614	0.988212	1.01588	1.07518	0.988971	0.083229	0.808161
3596	0.767466	0.723948	0.836964	0.728841	0.764305	0.0522039	0.00286806
3597	1.0824	1.04193	0.969536	0.930325	1.00605	0.0687625	0.871556
3598	1.36581	1.25429	1.32982	1.33382	1.32094	0.0472602	0.00086337
3599	0.863137	0.8986	1.07286	1.01897	0.963391	0.0988612	0.512631
3600	0.466281	0.664959	0.718193	0.763921	0.653339	0.131098	0.0131885
3601	1.03664	0.998017	0.892311	1.09702	1.006	0.0860474	0.897964
3602	1.12985	0.601358	0.756063	0.764323	0.812898	0.2242	0.193698
3603	1.22839	1.2375	1.45805	1.50899	1.35823	0.146202	0.0162626
3604	0.586321	0.675426	0.752455	0.770295	0.696124	0.0839832	0.00544241
3606	0.442482	0.733923	0.884172	0.738038	0.699654	0.185141	0.0476877
3607	1.24182	1.50044	1.3711	1.31003	1.35585	0.10991	0.00747507
3609	0.728982	0.687212	0.823588	0.738001	0.744446	0.0572125	0.00295905
3611	1.62704	1.22608	1.18874	1.25002	1.32297	0.204275	0.0507889
3612	1.90696	1.63825	1.49649	1.62203	1.66593	0.172722	0.00453365
3613	0.724076	0.930098	1.04743	0.941987	0.910899	0.135252	0.279238
3615	1.29715	1.23562	1.1269	1.12476	1.19611	0.0849518	0.0191222
3616	0.660637	0.78984	0.854495	0.738055	0.760757	0.082	0.0100275
3617	1.36384	1.44744	1.34809	1.37007	1.38236	0.0443596	0.000425291
3618	0.775338	0.730604	0.699971	0.90369	0.777401	0.0897004	0.0157073
3619	0.405964	0.676746	0.815424	0.491592	0.597431	0.184095	0.0221178
3620	0.724939	0.744807	0.829308	0.792312	0.772841	0.0470748	0.00236168
3621	1.00983	0.89685	0.902507	1.01656	0.956435	0.0656356	0.27633
3622	0.705235	0.800857	0.644054	0.998335	0.787121	0.154891	0.0708154
3623	0.988491	0.85302	0.855932	0.962041	0.914871	0.0705792	0.0948217
3624	1.1906	1.28643	1.19815	1.23501	1.22755	0.0437901	0.00190107
3625	1.50531	1.30179	1.23212	1.49949	1.38468	0.138894	0.0115983
3626	1.15564	0.978817	1.01849	1.25516	1.10203	0.127125	0.206809
3627	0.534343	0.557258	0.67088	0.625979	0.597115	0.0627251	0.00101805
3628	1.4568	1.34078	1.24722	1.55216	1.39924	0.1332	0.00929634
3630	0.56906	0.72927	0.96219	0.783623	0.761036	0.162108	0.0601113
3631	0.795151	0.92301	0.986822	0.896663	0.900411	0.0797316	0.0878541
3632	0.860878	0.664804	0.688513	0.833944	0.762035	0.0996664	0.0174519
3633	0.591684	0.519219	0.598564	0.593208	0.575669	0.0377484	0.000192698
3634	0.466659	0.656344	0.636199	0.832721	0.647981	0.149683	0.018184
3635	1.44887	0.923591	1.21272	1.4062	1.24785	0.239347	0.130116
3636	1.22187	1.07848	1.09188	1.07762	1.11746	0.0699111	0.0437255
3637	1.38267	1.09218	1.08217	1.11828	1.16882	0.143373	0.0998479
3638	0.476681	0.861538	0.672897	0.92891	0.735007	0.203469	0.0800461
3639	1.85727	1.48268	1.40789	1.88463	1.65812	0.247898	0.0130447
3640	0.801431	0.791196	0.772254	0.783325	0.787051	0.0123398	5.34774e-05
3641	0.817188	0.974429	0.94232	0.903447	0.909346	0.0679485	0.0757989
3642	1.45747	1.07158	1.19092	1.23361	1.2384	0.161347	0.0597804
3643	0.879845	1.1181	1.11933	0.795242	0.97813	0.16597	0.809199
3644	0.592372	0.713142	0.809751	0.836813	0.738019	0.110661	0.0178597
3646	2.52771	1.82461	1.63469	1.99131	1.99458	0.384121	0.0139776
3647	0.618951	0.772147	0.996408	0.829149	0.804164	0.155896	0.0867548
3649	0.833684	0.839003	0.971228	0.626605	0.81763	0.142358	0.0830595
3650	2.00976	0.997177	1.0344	1.18569	1.30676	0.475708	0.287586
3651	1.21576	1.18285	1.07495	1.12252	1.14902	0.0626805	0.0176563
3652	0.751987	0.781938	0.790763	0.74031	0.766249	0.0239674	0.000294369
3653	0.841635	1.19903	1.19161	0.731056	0.990833	0.240418	0.944015
3654	0.785591	0.678832	0.669005	0.617414	0.68771	0.070595	0.00304375
3655	1.37229	1.32601	1.2703	1.45701	1.3564	0.0789741	0.00287174
3656	0.710428	0.99621	0.997163	0.834322	0.884531	0.139034	0.195293
3658	0.850837	0.701257	0.719575	0.707373	0.744761	0.0711264	0.00557289
3659	0.631722	0.717412	0.83793	0.830062	0.754282	0.0985222	0.0154935
3661	0.866494	0.84753	0.753906	0.898588	0.841629	0.062163	0.0146146
3662	0.935458	0.948892	0.627342	0.929179	0.860218	0.155468	0.169984
3665	0.493981	0.714066	0.718573	0.719834	0.661613	0.111782	0.00904007
3666	1.05323	1.06515	1.02496	1.04721	1.04764	0.0168546	0.010958
3669	0.534136	0.617686	0.755497	0.660406	0.641931	0.0920983	0.00442552
3670	0.783859	0.831288	0.806876	0.948189	0.842553	0.0730378	0.0229779
3672	1.5267	1.27408	1.20069	1.21219	1.30341	0.152308	0.0282996
3674	0.806711	1.13691	0.714731	1.09418	0.938133	0.209	0.595486
3675	0.52071	0.742854	0.796597	0.774091	0.708563	0.127159	0.019497
3677	1.0282	1.02612	0.90168	0.9611	0.979274	0.0603847	0.541718
3678	0.753867	0.794538	0.969172	0.789324	0.826725	0.0966686	0.0371565
3681	0.536708	0.698791	0.705234	0.572907	0.62841	0.0863043	0.00329301
3682	0.804689	0.698894	0.753358	1.21239	0.867334	0.234061	0.339359
3683	2.08826	1.41482	1.55566	1.72586	1.69615	0.290698	0.017311
3684	1.08296	1.03648	0.819596	0.79519	0.933558	0.147251	0.433345
3685	0.558713	0.62183	0.729772	0.738009	0.662081	0.0868951	0.00442251
3686	2.08462	1.69913	1.71238	1.72963	1.80644	0.185871	0.00322042
3689	1.17301	1.05807	1.0569	1.01442	1.0756	0.0680389	0.112808
3690	0.579257	0.520128	0.888526	0.714637	0.675637	0.163621	0.0286628
3691	1.04539	0.924744	0.906398	0.915619	0.948037	0.0653321	0.209901
3692	0.427072	0.584827	0.650609	0.644028	0.576634	0.104004	0.00387507
3693	1.14811	0.594115	0.48837	0.882762	0.778338	0.297575	0.23305
3697	0.751851	0.932945	0.994937	1.02067	0.925101	0.121227	0.304514
3698	2.39144	1.87784	1.68845	1.83441	1.94803	0.306501	0.0085072
3699	1.19817	1.10919	0.970306	1.05639	1.08351	0.0954931	0.178592
3700	1.52413	1.4507	1.4454	1.23275	1.41324	0.125582	0.00713807
3701	0.395151	0.588945	0.768963	0.740501	0.62339	0.171451	0.0218533
3702	0.479994	0.757561	0.843946	1.38083	0.865582	0.376958	0.527209
3704	0.783526	0.716561	0.875649	0.813284	0.797255	0.0660874	0.00870644
3705	1.57376	1.20518	1.04053	1.53593	1.33885	0.25877	0.0790748
3706	1.2573	1.09777	1.09437	1.20124	1.16267	0.0802488	0.0270391
3707	0.956277	0.979776	0.989037	1.05423	0.99483	0.0419325	0.821141
3708	1.2039	1.10764	0.959388	1.05512	1.08151	0.102099	0.208606
3709	0.812739	0.795608	0.765328	0.900108	0.818446	0.0578628	0.00816988
3710	0.69766	0.850495	0.89153	0.687923	0.781902	0.104326	0.0249282
3711	1.19314	0.94647	0.884549	1.07579	1.02499	0.137533	0.740413
3712	1.03341	0.998929	0.998594	1.30605	1.08425	0.148768	0.339731
3713	0.606401	0.63702	0.842702	0.786021	0.718036	0.114294	0.0159628
3719	0.582908	0.651522	0.63339	0.678779	0.63665	0.0403934	0.000374565
3720	1.31451	1.11083	0.998252	1.00552	1.10728	0.14742	0.241566
3723	1.4466	1.43965	1.21628	1.40151	1.37601	0.108315	0.00612812
3725	0.856309	1.04122	1.11312	0.558654	0.892325	0.247355	0.448031
3726	0.518457	0.585005	0.626316	0.656258	0.596509	0.0596737	0.000874469
3727	0.440265	0.724063	0.739383	0.694675	0.649596	0.140782	0.0155798
3728	0.689071	0.546364	1.08802	0.940691	0.816037	0.243829	0.228446
3730	1.86357	1.5914	1.50091	1.71788	1.66844	0.157609	0.00344051
3731	1.30331	1.29998	1.29039	1.19547	1.27229	0.0515054	0.00180739
3732	0.905979	0.796853	0.826768	0.842	0.8429	0.0460448	0.00643867
3733	0.925676	0.9713	0.874545	0.839158	0.90267	0.05792	0.0437059
3734	1.9737	1.54447	1.45234	1.65651	1.65676	0.227192	0.0102906
3736	0.250337	1.16774	1.45923	1.09862	0.993981	0.519809	0.982978
3737	0.396964	0.555796	0.579167	0.752605	0.571133	0.145564	0.00975627
3738	0.702216	0.878227	0.575385	0.750589	0.726604	0.125202	0.0222021
3739	1.52587	1.34389	1.31974	1.51827	1.42694	0.110328	0.00448561
3740	0.829338	0.877774	0.843811	0.720291	0.817804	0.0681044	0.0127703
3741	1.29236	1.30427	1.19078	1.35623	1.28591	0.06922	0.00371482
3742	0.624892	0.630585	0.710121	0.752976	0.679644	0.0624795	0.00197707
3743	0.64029	0.680665	0.889448	0.882499	0.773225	0.13126	0.040778
3744	0.72734	0.983199	0.904064	0.931247	0.886463	0.111046	0.133419
3745	0.791251	0.723161	0.571331	0.962786	0.762132	0.16231	0.0609497
3746	1.45912	1.35259	1.2365	1.37785	1.35651	0.0920208	0.00447055
3748	2.11709	1.78157	1.90047	1.68651	1.87141	0.185709	0.00256295
3749	0.903587	1.05752	0.888558	1.00072	0.962595	0.0804708	0.421126
3750	0.466497	0.710844	0.647297	0.745906	0.642636	0.124317	0.0104532
3751	0.592695	0.683118	0.782523	0.523284	0.645405	0.112421	0.00804948
3752	1.55001	1.38558	1.26218	1.24284	1.36015	0.141482	0.0146477
3753	1.41424	1.89578	1.82447	2.20253	1.83426	0.324509	0.0142552
3754	1.28697	0.748311	1.05311	1.29621	1.09615	0.257736	0.50974
3756	0.550013	0.701394	0.788097	0.741897	0.69535	0.103163	0.00969289
3757	0.599381	0.250187	0.296924	0.32987	0.36909	0.156969	0.00402013
3758	0.953468	0.945423	0.932728	1.07442	0.976511	0.0658318	0.526976
3759	1.10366	0.964566	0.97984	1.01656	1.01615	0.0622813	0.639765
3761	1.0624	1.0809	1.04596	1.28494	1.11855	0.111838	0.124181
3762	0.735863	0.866789	1.01746	0.8437	0.865953	0.116008	0.103935
3763	1.82814	1.60428	1.60897	1.66974	1.67778	0.104581	0.000991368
3764	1.33398	1.09392	1.07633	1.50862	1.25321	0.206897	0.0918671
3766	0.686658	0.735155	0.840946	0.928191	0.797738	0.108229	0.0333976
3767	0.955964	0.874976	0.881378	1.04187	0.938547	0.0780793	0.213529
3771	1.00853	1.18513	0.978799	0.815101	0.99689	0.151597	0.969854
3772	0.91118	0.770055	0.902755	0.893586	0.869394	0.0666144	0.0295008
3775	1.54585	1.32732	1.14451	1.39259	1.35257	0.166217	0.0239874
3776	1.24101	1.21879	1.07277	1.36331	1.22397	0.119153	0.0329042
3777	0.963227	1.14165	1.07819	0.898405	1.02037	0.109835	0.73539
3779	0.61972	0.641971	0.65299	0.761897	0.669144	0.0633645	0.00187435
3780	0.907335	0.923452	0.877888	0.932978	0.910413	0.0241284	0.00505343
3781	0.954738	0.867568	0.896437	0.977415	0.924039	0.0508011	0.0581071
3782	0.660408	0.671201	0.790685	0.916905	0.7598	0.120228	0.0280865
3785	1.61797	1.3714	1.60345	1.33385	1.48167	0.149907	0.00763817
3786	1.29538	1.21209	1.07002	1.28013	1.2144	0.10284	0.0251091
3790	1.0202	0.945855	0.992677	0.95348	0.978053	0.0347898	0.296245
3793	1.6546	1.57324	1.81129	1.75424	1.69834	0.105586	0.00093352
3794	1.00876	1.12404	0.986369	1.33572	1.11372	0.15982	0.249869
3796	0.535137	0.83783	0.859885	0.857614	0.772617	0.158629	0.0642156
3799	0.652353	0.776287	0.87415	0.851218	0.788502	0.0999245	0.024124
3800	0.681862	0.669442	0.715709	0.74321	0.702556	0.0334191	0.000386579
3801	1.17335	1.07313	0.985355	1.0719	1.07593	0.0768534	0.142604
3802	0.808249	0.953137	0.783149	0.902779	0.861829	0.0797401	0.0404769
3803	1.07374	1.03988	0.966785	1.02117	1.02539	0.0447197	0.338623
3804	0.749983	0.897704	0.881601	1.22209	0.937844	0.200716	0.579544
3805	1.50347	1.59402	1.33805	1.28249	1.42951	0.144354	0.00949029
3806	0.694484	0.785308	0.795488	0.881441	0.78918	0.0764508	0.0117392
3808	1.44419	1.24364	1.357	1.27865	1.33087	0.0891811	0.00506445
3809	1.10097	1.19014	0.996758	1.06859	1.08911	0.0802023	0.112809
3810	1.18637	1.06611	1.02953	0.95935	1.06034	0.0949834	0.293471
3811	0.903353	1.01407	1.32142	1.04901	1.07196	0.177515	0.476836
3812	0.84129	0.729145	0.859593	0.782535	0.803141	0.0592793	0.00695452
3815	1.17615	1.17245	1.23837	1.27292	1.21497	0.0490568	0.0031285
3818	1.33876	1.70837	1.75177	1.43358	1.55812	0.203065	0.0118477
3821	1.07325	1.13372	1.02772	0.957903	1.04815	0.0741923	0.285102
3822	1.5238	1.43472	1.25196	1.30806	1.37963	0.122803	0.00852043
3823	0.330074	0.378019	0.401055	0.387624	0.374193	0.0308928	3.30885e-05
3824	0.471395	0.688825	0.894573	1.0482	0.775747	0.250688	0.171544
3825	1.12947	0.931462	0.86661	0.957803	0.971337	0.112172	0.644543
3826	0.61198	0.719795	0.795416	0.891949	0.754785	0.118438	0.0255735
3827	1.00342	1.00133	1.06602	0.900167	0.992735	0.068625	0.845881
3828	0.557533	0.679684	0.739765	0.736567	0.678387	0.0851655	0.00481306
3829	2.83344	2.51478	1.73634	2.8276	2.47804	0.516387	0.01058
3830	1.18574	1.15935	1.05804	1.07904	1.12054	0.0616086	0.0296605
3832	1.17098	1.176	1.05718	1.23868	1.16071	0.0755782	0.0238288
3833	1.50347	1.59402	1.33805	1.28249	1.42951	0.144354	0.00949029
3834	1.37452	1.24995	1.203	1.2691	1.27414	0.0724502	0.00478538
3835	0.88036	1.03838	0.957289	1.06474	0.985193	0.0835177	0.746367
3836	0.836225	0.756965	0.791849	0.783893	0.792233	0.0329081	0.00107112
3837	1.59046	1.42672	1.19401	1.29564	1.37671	0.17141	0.021824
3839	1.04539	0.924744	0.906398	0.915619	0.948037	0.0653321	0.209901
3840	0.536976	0.700756	0.771382	0.706319	0.678858	0.0998743	0.00762224

## Sheet: mix-9
Supplementary Table 4. BI measurement of compounds in mix-9 from four individual MS affinity assays
Hits are in bold red with mean BI >2.0 and p <0.05
Cpd ID	BI-1	BI-2	BI-3	BI-4	Mean	s.d.	p-value
3841	1.47627	1.96003	2.0357	1.91932	1.84783	0.252354	0.00672814
3842	0.508024	0.656372	0.68238	0.626244	0.618255	0.0769844	0.00218071
3843	0.639451	0.711395	0.660242	0.61885	0.657484	0.0397145	0.000424579
3844	0.653936	0.732578	0.65145	0.718455	0.689105	0.0424504	0.000690152
3845	0.718048	0.928938	0.904532	0.805929	0.839362	0.0967915	0.0450788
3846	0.597185	1.11162	1.18225	0.986777	0.96946	0.261011	0.830034
3848	0.687726	0.848357	0.757084	0.716762	0.752482	0.0699583	0.00580369
3849	0.7885	0.943476	1.12627	0.97749	0.958933	0.138601	0.595154
3850	0.520559	0.812182	0.974203	0.895698	0.80066	0.198107	0.137658
3851	1.05828	1.31059	1.70719	1.39679	1.36821	0.267771	0.0707303
3852	0.629485	0.8644	0.819033	0.797833	0.777688	0.102629	0.0226828
3853	0.487812	0.701427	0.982677	0.642086	0.7035	0.20675	0.0641453
3855	0.410497	0.568068	0.618825	0.807115	0.601126	0.16348	0.0164519
3857	1.18011	1.86831	1.89729	1.49662	1.61058	0.340057	0.0369958
3858	0.328983	0.49965	0.57891	0.449094	0.464159	0.104764	0.00199146
3859	1.20122	1.83632	1.60288	1.69214	1.58314	0.272175	0.023356
3862	0.422855	0.421716	0.407512	0.669382	0.480366	0.126204	0.003749
3863	0.401385	0.517393	0.503641	0.559428	0.495462	0.0670572	0.000637048
3864	0.424513	0.481527	0.390053	0.513327	0.452355	0.0554536	0.000283582
3868	0.477512	0.622158	0.705247	0.596219	0.600284	0.0941368	0.00342878
3869	1.29609	1.59753	1.68664	1.76202	1.58557	0.20436	0.0105478
3870	0.900449	0.988037	1.11282	0.993844	0.998787	0.0872032	0.979551
3872	0.434241	0.701684	0.906953	0.620981	0.665965	0.195849	0.0421153
3873	0.584031	0.676278	0.656149	0.625673	0.635533	0.0401448	0.000364395
3874	0.535847	0.727477	0.682992	0.576301	0.630654	0.0895479	0.00373023
3875	1.53118	1.45513	1.46067	1.40551	1.46312	0.0517056	0.000379359
3876	1.10939	1.17639	1.18966	1.14295	1.1546	0.0359793	0.00331261
3877	1.19003	1.35797	1.4789	1.3721	1.34975	0.119383	0.00991223
3878	0.584579	0.75407	0.777263	0.880839	0.749188	0.122801	0.0265071
3879	0.614315	0.758992	0.753628	0.68981	0.704186	0.0676552	0.00314885
3880	1.48626	1.88426	2.20509	1.93436	1.87749	0.296455	0.00962993
3882	0.548585	0.664869	0.495023	0.634652	0.585782	0.0780253	0.00178527
3883	1.30274	1.55695	1.68449	1.59711	1.53532	0.163942	0.00729632
3884	0.38744	0.596783	0.671577	0.608193	0.565998	0.123502	0.00591762
3887	0.757508	0.884741	0.962311	0.817334	0.855473	0.0881716	0.0464851
3888	4.99783	6.93344	9.94827	8.18331	7.51571	2.08501	0.00826375
3889	1.63549	1.91588	2.06482	1.95962	1.89395	0.183294	0.00228921
3890	0.589467	0.654199	0.803298	0.629889	0.669213	0.0932916	0.0057679
3891	1.208	1.1269	1.2124	1.19392	1.1853	0.0397286	0.00260831
3893	0.422346	0.615743	0.662769	0.554274	0.563783	0.104232	0.00357602
3895	1.03576	0.976215	0.856078	1.03681	0.976216	0.0849522	0.614618
3896	0.520302	0.779055	0.518759	1.43193	0.812511	0.430687	0.448013
3897	0.386388	0.67856	0.747118	0.631729	0.610949	0.157027	0.0157765
3898	0.416436	0.540527	0.664391	0.755298	0.594163	0.147604	0.0118355
3899	0.605352	1.27504	1.23711	0.970142	1.02191	0.309075	0.896245
3900	0.926546	0.796903	0.700006	0.670136	0.773398	0.115551	0.029484
3901	1.52815	1.9044	1.42208	1.60419	1.6147	0.207067	0.00955104
3902	0.457046	0.592922	0.625498	0.749279	0.606186	0.120094	0.00720879
3903	2.26995	1.97939	2.45666	2.27034	2.24409	0.197154	0.0010728
3904	0.468957	0.796277	0.761697	0.683031	0.677491	0.146876	0.0218751
3905	0.358783	0.486254	0.555853	0.581228	0.495529	0.0996139	0.00205021
3907	1.81246	1.98981	1.32286	1.93409	1.7648	0.303795	0.0151008
3908	1.32124	1.4584	1.59528	1.43894	1.45347	0.112292	0.00396577
3909	0.799273	0.968783	0.942234	0.865352	0.89391	0.0768394	0.0700739
3911	1.32124	1.4584	1.59528	1.43894	1.45347	0.112292	0.00396577
3912	1.04808	1.00736	1.12684	1.12148	1.07594	0.0581455	0.0795442
3913	0.298121	0.302996	0.318328	0.319499	0.309736	0.0107929	1.05355e-06
3914	0.367491	0.443241	0.693932	0.60832	0.528246	0.149368	0.00801942
3915	1.60563	1.37533	1.95172	1.59829	1.63274	0.238	0.0129933
3917	1.43852	1.37785	1.3699	1.43956	1.40646	0.0377676	0.000219446
3918	0.279673	0.525508	0.53493	0.438621	0.444683	0.11824	0.00255629
3919	1.47926	1.43585	1.32855	1.91171	1.53884	0.256522	0.0246145
3920	1.06323	1.2347	1.14512	1.01417	1.11431	0.0967498	0.099138
3921	0.964955	1.10479	1.12676	0.998655	1.04879	0.0790707	0.305043
3922	0.505312	0.770905	0.719621	0.715784	0.677905	0.117774	0.0120128
3923	0.708279	0.87629	0.886232	0.792118	0.81573	0.083149	0.0213412
3924	1.17938	0.841496	0.915547	0.876091	0.953127	0.153836	0.585321
3925	0.882534	1.16786	1.37222	1.22219	1.1612	0.204897	0.213668
3926	0.98498	1.22445	1.28782	1.21498	1.17806	0.132718	0.0748429
3929	0.726239	1.09767	0.668475	0.850886	0.835817	0.190441	0.183132
3930	0.633545	0.884346	1.01581	0.849323	0.845757	0.158593	0.146971
3931	0.731588	1.07264	0.949416	0.991123	0.936192	0.145687	0.445535
3932	0.294484	0.494532	0.605051	0.498087	0.473039	0.129613	0.00388894
3933	1.18971	1.72883	1.6839	1.59057	1.54825	0.245868	0.0209912
3934	1.04645	1.12701	1.25006	1.11498	1.13462	0.0847429	0.050202
3935	0.655871	0.391452	0.597054	0.298279	0.485664	0.168688	0.00885873
3938	1.40864	0.380609	1.02676	0.993816	0.952457	0.425184	0.837406
3940	0.565937	0.641364	0.68122	0.65506	0.635895	0.0494828	0.000680602
3942	1.21117	0.874081	0.576956	1.08696	0.937293	0.277639	0.682133
3943	0.515433	0.67253	0.833918	0.657995	0.669969	0.13027	0.0148413
3945	1.73946	2.71746	3.4952	2.49423	2.61159	0.722581	0.0209796
3946	0.467136	0.618561	0.668871	0.548893	0.575865	0.0876024	0.00233878
3948	0.761312	0.821925	0.924559	0.83482	0.835654	0.0673798	0.0164667
3949	1.18775	1.4005	1.47455	1.34436	1.35179	0.121664	0.0102837
3951	1.26409	1.10017	1.3184	1.26248	1.23628	0.0943914	0.0153383
3952	1.13939	0.996274	1.11749	0.997668	1.06271	0.0764305	0.199365
3953	0.634616	0.672962	0.835925	0.738149	0.720413	0.0880728	0.00790438
3957	0.796522	0.832374	0.759802	0.948987	0.834421	0.0819226	0.0272464
3958	0.349926	0.507212	0.572542	0.492636	0.480579	0.0937768	0.00157584
3959	2.65337	4.40719	4.29144	3.33635	3.67209	0.83156	0.00763649
3963	0.51341	0.56807	0.764025	1.00439	0.712475	0.222376	0.0813603
3964	0.54072	0.652476	0.61975	0.677823	0.622692	0.0595948	0.00106231
3965	0.724957	1.01065	1.09216	0.889374	0.929283	0.159676	0.440987
3966	1.17292	1.22294	1.31698	1.11538	1.20706	0.0854503	0.0167643
3967	0.802775	0.896206	1.09586	0.586284	0.84528	0.211555	0.239733
3969	0.957941	0.821463	0.801058	0.900641	0.870276	0.0725285	0.0373608
3971	1.30578	0.435324	0.50565	0.440535	0.671823	0.423849	0.219247
3972	1.15869	1.2672	1.45259	1.40426	1.32069	0.133525	0.0171749
3973	1.10097	0.939886	1.21264	1.07237	1.08147	0.112123	0.242134
3976	0.378831	0.781423	0.672536	0.606189	0.609745	0.170049	0.0194273
3977	1.4733	1.50708	1.66747	1.63013	1.56949	0.093851	0.00120425
3980	0.754171	0.604566	0.897233	0.760955	0.754231	0.119575	0.0260708
3981	1.34043	1.63697	1.74566	1.53903	1.56552	0.172162	0.00717395
3982	1.92572	2.30072	2.31595	2.42491	2.24182	0.21787	0.00144841
3983	1.70643	1.78883	2.02128	1.92421	1.86019	0.13998	0.00116024
3987	1.1782	1.39262	1.5945	1.13951	1.32621	0.210677	0.0534316
3988	1.40057	0.865435	1.3074	1.64684	1.30506	0.326197	0.158189
3989	1.06803	1.34801	1.59144	1.47425	1.37043	0.224774	0.0458701
3991	0.410924	0.511322	0.72204	0.631335	0.568905	0.136164	0.00796458
3994	0.810388	1.38932	0.482546	0.625536	0.826948	0.398212	0.448719
3998	0.684216	0.42816	0.479204	0.365252	0.489208	0.138106	0.0051101
3999	0.564424	0.614486	0.641964	0.704771	0.631411	0.0585002	0.00107763
4000	2.43913	0.900575	0.763433	1.47189	1.39376	0.761457	0.377093
4002	0.865551	0.560466	0.886332	0.833846	0.786549	0.152259	0.06764
4003	0.448042	0.638325	0.539241	0.525052	0.537665	0.0781584	0.00129831
4007	1.11513	1.20763	1.21758	1.37512	1.22886	0.107867	0.023969
4009	0.406548	0.660405	0.521597	0.55992	0.537117	0.104895	0.00306561
4010	1.72576	1.55175	1.88336	1.58565	1.68663	0.151241	0.00282214
4011	1.02351	1.09189	1.06875	1.17671	1.09022	0.0642743	0.0674477
4013	0.61295	0.700227	0.657271	0.618859	0.647327	0.0403712	0.000408678
4014	4.57341	5.27239	8.33634	6.18717	6.09233	1.63544	0.00834876
4015	1.21091	0.999946	0.801339	0.908687	0.980221	0.1739	0.834675
4017	0.468033	0.589784	0.491721	0.611253	0.540198	0.0708649	0.000987992
4021	0.540613	0.629354	0.884811	0.55922	0.653499	0.158871	0.0222733
4023	0.831807	0.888957	1.30994	0.879999	0.977676	0.222927	0.854067
4024	1.44529	1.31655	1.40464	1.33275	1.3748	0.0606103	0.00113888
4025	0.598616	1.10133	1.16587	0.991349	0.964291	0.254207	0.797015
4026	0.628639	0.847231	0.842988	0.751077	0.767484	0.102645	0.0201214
4027	0.628639	0.847231	0.842988	0.751077	0.767484	0.102645	0.0201214
4028	0.969603	0.943244	1.05005	0.841793	0.951172	0.0859129	0.338253
4029	1.16187	1.71297	1.96301	1.89891	1.68419	0.364001	0.0329066
4030	0.753099	0.848545	0.897339	0.853764	0.838187	0.0607971	0.0129535
4031	0.495077	0.573065	0.488675	0.538277	0.523773	0.0395618	0.000157064
4032	1.70418	1.74831	1.69491	1.66215	1.70239	0.0355278	3.55925e-05
4033	1.11682	1.01626	1.13313	1.02606	1.07307	0.0604385	0.0943495
4034	0.613451	0.775978	0.775561	0.756287	0.730319	0.0784519	0.00630252
4035	0.974743	1.12892	1.13628	0.971868	1.05295	0.0920269	0.333203
4036	0.702608	0.871432	0.806752	1.20246	0.895813	0.215937	0.405737
4037	0.866284	0.876123	0.957071	0.922089	0.905391	0.0421725	0.0206536
4043	0.835429	0.794448	0.705284	0.669809	0.751243	0.0768063	0.0074676
4044	1.03241	1.25929	1.19027	1.12713	1.15228	0.0964292	0.0509383
4045	0.936725	0.96044	1.0265	0.972049	0.97393	0.0380078	0.263701
4048	1.24322	1.1973	1.30265	1.22043	1.2409	0.0452368	0.00176899
4054	0.799944	0.918756	1.3442	1.0144	1.01933	0.233675	0.879139
4060	0.804749	0.951237	0.631644	0.676856	0.766122	0.143541	0.0471782
4061	1.14364	1.11855	1.08042	1.12579	1.1171	0.0266289	0.00309696
4062	0.832536	0.924348	0.861431	1.06287	0.920296	0.102486	0.217693
4065	1.14251	1.22738	1.49362	1.14021	1.25093	0.166799	0.0572678
4066	0.40017	0.669541	0.763989	0.689719	0.630855	0.159062	0.018849
4069	1.16374	1.08445	1.38784	1.09963	1.18392	0.140223	0.0787852
4072	0.914779	0.776488	0.69231	0.858189	0.810442	0.0970809	0.0298182
4074	0.371822	0.557821	0.589489	0.538939	0.514518	0.09739	0.0021473
4075	1.19673	0.900486	0.801471	1.15551	1.01355	0.192758	0.897117
4076	1.26061	1.21173	1.24361	1.24769	1.24091	0.0207577	0.00017517
4082	0.552732	0.952073	1.52753	0.745599	0.944483	0.421514	0.809285
4084	0.347708	0.98229	1.84338	1.13714	1.07763	0.614218	0.816772
4086	1.31671	1.1859	1.21083	1.37463	1.27202	0.0888571	0.00875894
4088	1.21491	1.52866	1.28126	1.13721	1.29051	0.169332	0.0414999
4089	0.794502	1.063	0.731187	0.754559	0.835812	0.153698	0.122256
4098	0.542891	0.919406	0.739241	0.788946	0.747621	0.156208	0.0481672
4102	0.501636	0.669433	0.918658	0.645111	0.68371	0.173248	0.0354601
4103	0.441165	0.658942	0.714853	0.708035	0.630748	0.12882	0.0105371
4115	1.12026	1.08935	1.32472	1.16971	1.17601	0.104521	0.043476
4118	0.475302	1.05871	0.852837	0.798375	0.796307	0.241593	0.190334
4119	0.542891	0.919406	0.739241	0.788946	0.747621	0.156208	0.0481672
4125	0.456813	0.672856	1.07812	0.691186	0.724743	0.258506	0.123058
4127	0.928707	1.00418	0.744775	0.726279	0.850985	0.137041	0.117928
4132	1.59971	1.40404	1.48396	1.14398	1.40792	0.193431	0.0243585
4133	1.39661	0.694003	0.928803	0.899441	0.979715	0.296913	0.899972
4135	0.553545	0.832843	0.69033	0.72162	0.699585	0.114973	0.0136308
4136	0.363664	0.858912	0.76819	1.16254	0.788328	0.329528	0.289108
4140	1.15809	1.51687	2.92841	1.50226	1.77641	0.785694	0.142562
4143	0.931528	1.19216	1.18541	1.31649	1.1564	0.161573	0.1483
4144	0.931528	1.19216	1.18541	1.31649	1.1564	0.161573	0.1483
4147	1.20853	1.6393	1.83736	1.48641	1.5429	0.265202	0.0263475
4151	1.43039	1.80921	1.77457	1.72539	1.68489	0.173118	0.0042084
4158	0.391579	0.837258	0.870155	0.656408	0.68885	0.219332	0.065795
4160	0.746908	0.746212	0.709851	0.788491	0.747865	0.0321412	0.000562802
4161	0.407989	0.570335	0.635924	0.653708	0.566989	0.1119	0.00448603
4162	0.347708	0.98229	1.84338	1.13714	1.07763	0.614218	0.816772
4163	0.262746	0.596144	0.549849	0.497452	0.476548	0.148127	0.00582378
4164	1.42678	1.46129	1.49555	1.27806	1.41542	0.0957815	0.00322379
4165	0.418594	0.547287	0.73156	0.50772	0.551291	0.131681	0.00646217
4166	0.603644	0.631435	0.730884	0.622776	0.647185	0.0569947	0.00113536
4170	2.09067	1.57627	2.12638	2.3228	2.02903	0.318627	0.00752809
4172	1.28659	1.54315	1.60214	1.36482	1.44917	0.148077	0.00898806
4175	0.814259	0.808139	0.943755	0.852311	0.854616	0.0625564	0.0187771
4176	0.96959	0.768044	0.485889	0.666875	0.7226	0.201831	0.0708109
4179	0.552943	0.598027	1.15013	0.693295	0.748599	0.274008	0.163854
4183	0.8362	0.530487	0.73737	0.583919	0.671994	0.14026	0.0184636
4191	0.81504	0.954794	0.934257	1.07278	0.944218	0.105556	0.368127
4198	0.562439	1.18231	1.46284	1.04688	1.06362	0.376353	0.757584
4199	0.642052	0.763372	0.807158	0.71362	0.73155	0.0708533	0.00476751
4202	0.695657	0.81642	0.877423	0.580308	0.742452	0.13187	0.0297998
4203	0.562439	1.18231	1.46284	1.04688	1.06362	0.376353	0.757584
4206	1.24164	1.16477	1.34665	1.26051	1.25339	0.0746954	0.00654509
4207	1.22273	1.07565	1.34572	1.22548	1.21739	0.110534	0.0292623
4211	0.552732	0.952073	1.52753	0.745599	0.944483	0.421514	0.809285
4212	0.661617	0.836542	1.17822	0.751408	0.856946	0.225775	0.294505
4219	1.11809	2.41687	1.92241	1.56226	1.75491	0.550424	0.0711589
4224	0.272249	0.390032	0.381918	0.596249	0.410112	0.135217	0.00316959
4225	0.552943	0.598027	1.15013	0.693295	0.748599	0.274008	0.163854
4231	0.176522	0.788524	0.498568	0.773273	0.559222	0.287828	0.0548727
4233	0.421643	0.497929	0.829085	0.605626	0.588571	0.177218	0.0188308
4234	1.35309	2.31387	1.92141	1.50226	1.77266	0.433662	0.0377286
4239	0.622722	0.82214	0.90922	0.704962	0.764761	0.126375	0.0337401
4244	1.30036	1.46195	1.59591	1.47933	1.45939	0.121562	0.00480315
4247	1.59589	0.372921	1.27454	1.39713	1.16012	0.541247	0.595695
4249	0.27605	0.469251	0.624648	0.500504	0.467613	0.144269	0.00514326
4250	0.74507	0.795766	0.982332	0.734153	0.814331	0.115173	0.04843
4252	0.914106	0.865748	0.690943	0.820491	0.822822	0.0958692	0.0343673
4253	0.827419	0.859196	0.662111	0.812101	0.790207	0.0876206	0.0173191
4254	0.548585	0.664869	0.495023	0.634652	0.585782	0.0780253	0.00178527
4255	0.761008	1.70676	1.60325	1.13414	1.30129	0.437961	0.262585
4259	0.614367	0.68524	0.64838	0.686863	0.658713	0.0344939	0.000282012
4266	1.14309	1.50587	2.78441	1.60526	1.75966	0.71146	0.122374
4267	1.0536	1.28583	1.44832	1.24251	1.25756	0.162289	0.0503209
4270	1.31546	1.51058	1.42337	1.35009	1.39987	0.0864307	0.00267086
4274	0.60926	0.771171	0.76348	0.598334	0.685561	0.0945704	0.00693051
4275	0.907986	1.06357	1.08897	0.930155	0.997671	0.0917976	0.962715
4279	1.82944	2.40878	2.19151	2.2177	2.16186	0.241846	0.00239254
4281	0.804749	0.951237	0.631644	0.676856	0.766122	0.143541	0.0471782
4282	1.56327	1.56055	1.7276	1.44184	1.57332	0.117407	0.00228103
4286	0.448371	0.74793	0.895326	0.771662	0.715822	0.189649	0.0578127
4287	0.56041	1.19513	0.898352	0.617727	0.817904	0.291629	0.300304
4292	0.551123	0.736156	0.824174	0.749373	0.715207	0.116051	0.0161944
4295	1.15627	1.54934	1.67791	1.69808	1.5204	0.251534	0.0256231
4302	0.581765	0.867446	0.656134	0.673683	0.694757	0.121826	0.0152988
4304	1.22675	1.45875	1.14272	0.934775	1.19075	0.216755	0.17663
4306	1.23406	1.19368	1.71155	1.16312	1.3256	0.258935	0.0865605
4309	1.26557	1.01174	0.897012	1.01793	1.04807	0.1553	0.579744
4312	0.810479	0.842052	0.693729	0.769259	0.77888	0.0641154	0.00624394
4314	0.487621	0.791552	0.910199	0.801611	0.747746	0.181546	0.0690506
4318	0.803065	1.39591	0.481522	0.625409	0.826478	0.401759	0.451226
4323	1.08108	1.08562	1.03972	1.05493	1.06534	0.0217866	0.00928095
4325	0.746865	0.899256	1.19068	0.822525	0.91483	0.194136	0.444851
4332	0.533879	0.777252	0.918448	0.802949	0.758132	0.161622	0.057991
